# Supplementary material for: Expeditious preparation of β-sec-alkyl vicinal amino alcohols used for chiral ligand synthesis
Source: Royal Society of Chemistry journal article supplement (doi:10.1039/d3ob00803g), 2023-01-01
Supplement: d3ob00803g1.pdf [file d3ob00803g1.pdf]

## Supporting Information

### Expeditious Preparation of $\beta$ -*sec*-Alkyl Vicinal Amino Alcohols Used for Chiral Ligand Synthesis

Guoqi Huang, Yu Wu, Hegui Gong\* and Yunrong Chen\*

Center for Supramolecular Chemistry and Catalysis and Department of Chemistry, College of Sciences, Shanghai University, 99 Shangda Road, Shanghai 200444, People's Republic of China

E-mail: hegui\_gong@shu.edu.cn; yr\_chen@shu.edu.cn

#### Table of Contents

|                                                                   |    |
|-------------------------------------------------------------------|----|
| General Information                                               | 1  |
| Synthetic Route A                                                 | 2  |
| I. Protection of the Hydroxy and <i>N</i> -Boc Amino Groups in S1 | 2  |
| II. Grignard Reaction of Compound 1                               | 3  |
| III. Burgess Dehydration Reaction of Compound 2                   | 6  |
| IV. Hydrogenation of Compound 3                                   | 7  |
| V. Deprotection of Compound 4                                     | 10 |
| Ee and dr Determination of the Chiral Amino Alcohols              | 11 |
| Synthetic Route B                                                 | 25 |
| Synthetic Route C                                                 | 28 |
| Synthesis of Ligands                                              | 31 |
| I. Synthesis of <i>i</i> Pr-BiOx                                  | 31 |
| II. Synthesis of ( <i>R</i> )-PyOx-5d                             | 33 |
| III Synthesis of ( <i>R,R</i> )-BiOx-5d                           | 34 |
| IV Application of BiOx-5d                                         | 35 |
| Spectroscopic Data (NMR Spectra)                                  | 38 |
| References                                                        | 66 |

## General Information

Anhydrous THF and toluene was distilled after treated with sodium/benzophenone prior to use. Anhydrous DCM was distilled after treated with calcium hydride. Unless otherwise noted, all other reagents and starting materials were purchased from commercial sources and used without further purification. Boc-L-serine methyl ester (CAS: 2766-43-0, purchased from Adamas), Burgess reagent (CAS: 29684-56-8, purchased from Adamas), MeMgBr (3.0 M solution in 2-methyl-THF, purchased from Adamas), magnesium chips (purchased from Sinopharm Chemical Reagent Co., Ltd.). All reagents and starting materials were purchased from commercial sources without further purification, except for specific instructions.

Column chromatography was performed using silica gel (Huanghai, 300-400 mesh) as the stationary phase. All NMR spectra were recorded on JEOL 400 MHz spectrometer or Bruker 600 MHz spectrometer.  $^1\text{H}$  NMR and  $^{13}\text{C}$  NMR chemical shifts are reported in  $\delta$  units, parts per million (ppm) relative to the chemical shift of residual solvent. Reference peaks for chloroform in  $^1\text{H}$  NMR and  $^{13}\text{C}$  NMR spectra were set at 7.26 ppm and 77.16 ppm, respectively. Ultra-Fast liquid chromatography was performed on Shimadzu Chromatographs using Daicel Chiralcel columns (250 mm). Optical rotations were measured on a JASCO P1030 using a 100 mm pathlength cell at 589 nm with  $[\alpha]_{\text{D}}$  values reported in degrees. Mass spectrometry data were obtained from Agilent Technologies 6230 TOF LC/MS spectrometer in electrospray ionization (ESI<sup>+</sup>) mode or atmospheric pressure chemical ionization (APCI<sup>-</sup>) mode. Melting point was recorded on a micro melting point apparatus (X-4, YUHUA Co., Ltd, Gongyi, China).

## Synthetic Route A

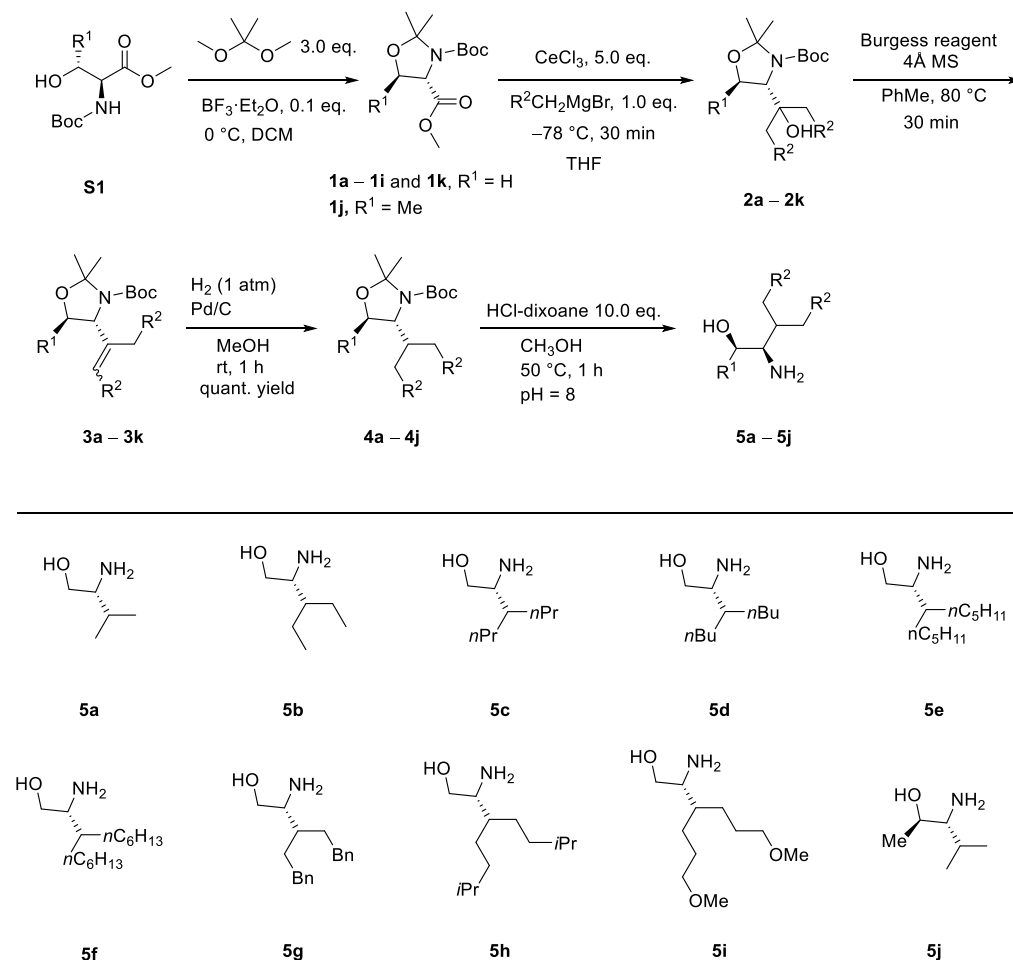

**Scheme S1** Synthetic route A and scope investigation of this pathway.

### I. Protection of the Hydroxy and *N*-Boc Amino Groups in S1

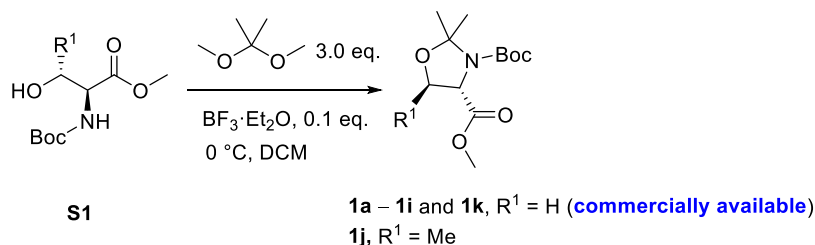

**General Procedure 1:** The synthetic method of **1a** was reported in previous work.<sup>1</sup> To a solution of Boc-L-serine methyl ester (14 g, 64 mmol, 1.0 equiv.) in DCM (100 mL) were added 2,2-dimethoxypropane (20 g, 192 mmol, 3.0 equiv.) and BF<sub>3</sub>·Et<sub>2</sub>O (48% wt, 4.5 g, 6.4 mmol, 0.1 equiv.) at 0 °C. The color of the reaction solution changed from

light yellow to dark red. After the reaction mixture was warmed to room temperature, it was allowed to stir at 25 °C for 3 hours. After that, TLC analysis showed no remaining starting material and clean formation of a single product. The reaction was quenched with saturated NaOH aqueous solution, and the aqueous layer was extracted with two portions of ethyl acetate. The combined organic layer was washed with 10% NaCl aqueous solution, dried over Na<sub>2</sub>SO<sub>4</sub>, filtered, and concentrated in vacuo. The residue was purified by column chromatography on silica gel (10% ethyl acetate in hexane).

### 3-(*tert*-Butyl) 4-methyl (*S*)-2,2-dimethyloxazolidine-3,4-dicarboxylate (**1**).

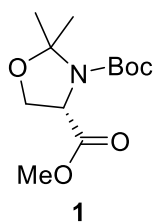

The title compound is commercially available. It was prepared according to the **general procedure 1**. After purification by a flash column chromatography (silica gel: 10% ethyl acetate in petroleum ether), the product **1** was obtained as a pale-yellow oil (16.4 g, yield 99%).

**<sup>1</sup>H NMR (600 MHz, Chloroform-*d*)** δ 4.42 (ddd, *J* = 65.1, 6.9, 2.8 Hz, 1H), 4.16 – 4.10 (m, 1H), 4.07 – 3.99 (m, 1H), 3.74 (d, *J* = 1.5 Hz, 3H), 1.73 – 1.30 (m, 15H).

### 3-(*tert*-Butyl) 4-methyl (4*S*,5*R*)-2,2,5-trimethyloxazolidine-3,4-dicarboxylate (**1j**).

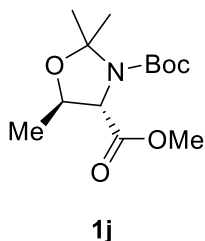

The title compound was prepared according to the **general procedure 1** using Boc-L-threonine methyl ester (2.0 g, 8.78 mmol) as the starting material. After purification by a flash column chromatography (silica gel: 10% ethyl acetate in petroleum ether), the product **1j** was obtained as a pale-yellow oil (2.3 g, yield 96%).

**<sup>1</sup>H NMR (600 MHz, Chloroform-*d*)** δ 4.12 – 3.78 (m, 2H), 3.68 (s, 3H), 1.60 – 1.26 (m, 18H).

**HRMS** (ESI) *m/z* calcd for C<sub>13</sub>H<sub>24</sub>NO<sub>5</sub><sup>+</sup> [(M+H)<sup>+</sup>] 274.1649, found 274.1653.

## II. Grignard Reaction of Compound 1

### Grignard reagent synthesis:

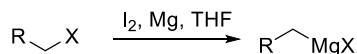

X = Cl, Br

The preparation of Grignard reagents was adapted from procedures described by Repo.<sup>2</sup> Magnesium (1.1 equiv., 2.16 g, 90 mmol) was activated by washing with 1 M HCl, then washed with water, ethanol, and ether before transferring to a flame-dried 250 mL 3-neck flask, equipped with a reflux condenser and a stir bar. The Mg was stirred under vacuum for 60 min. Under nitrogen atmosphere alkyl halide (RBr or RCl, 1 equiv., 82 mmol) was dissolved in anhydrous THF (40 mL), then 1 mL of alkyl halide solution was added and a fleck of I<sub>2</sub> was added, and then the stirring mixture was periodically heated to reflux with a heat gun over 2 minutes, until the brown solution turned colorless. Then the remaining alkyl halide in dry THF was added to the reaction in an addition funnel slowly over 40 minutes, while a mild reflux was maintained. After addition of alkyl halide, the reaction was stirred at 75 °C until the magnesium chips are completely consumed, then it was cooled to room temperature and titrated. Yields of some Grignard reagent was listed as shown below. The result indicated that it's easy to prepare these 1° alkyl Grignard reagents in high yields.

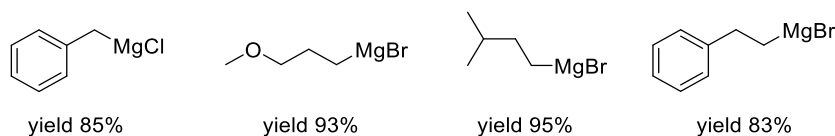

### Grignard Reaction:

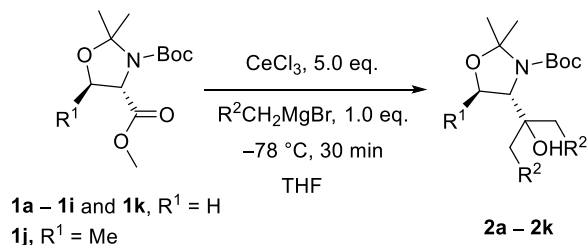

**General Procedure 2:** The synthesis of **2a – 2k** was adapted from procedure described by Ledoussal.<sup>3</sup> A suspension of cerium (III) chloride (1.4 g, 5.8 mmol, 1.0 equiv.) in THF (80 mL) at room temperature was stirred vigorously for 2 hours. (*S*)-3-*tert*-butyl 4-methyl 2,2-dimethyloxazolidine-3,4-dicarboxylate (**1**, 1.5 g, 5.8 mmol, 1.0 equiv.) in

THF (10 mL) was then added. The suspension was cooled to  $-78\text{ }^{\circ}\text{C}$  and Grignard reagent 1.0 M (29 mL, 29 mmol, 5.0 equiv.) was added dropwise. The reaction was stirred at  $-78\text{ }^{\circ}\text{C}$  for 30 minutes and then warmed to room temperature, after that GCMS analysis showed no remaining starting material and clean formation of a single product. The reaction was quenched with saturated  $\text{NH}_4\text{Cl}$ , diluted further with water and extracted twice with ethyl acetate. The organic layer was dried over magnesium sulfate, filtered and concentrated. After column chromatography (silica gel: 5% ethyl acetate in petroleum ether) purification, the reaction afforded product **2** (yield: 87%–95%).

***tert*-Butyl (*S*)-4-(3-hydroxypentan-3-yl)-2,2-dimethyloxazolidine-3-carboxylate (2b).**

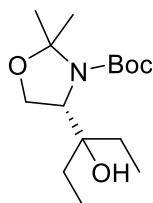

**2b**

The title compound was prepared according to the **general procedure 2** using **1a** (1.5 g, 5.79 mmol) as the starting material. After purification by a flash column chromatography (silica gel: 5% ethyl acetate in petroleum ether), the product **2b** was obtained as a colorless oil (1.58 g, yield 95%).

**$^1\text{H NMR}$  (600 MHz, Chloroform-*d*)**  $\delta$  5.07 (s, 1H), 4.16 (d,  $J = 7.3$  Hz, 1H), 4.00 (t,  $J = 8.5$  Hz, 1H), 3.82 (d,  $J = 8.5$  Hz, 1H), 1.62 – 1.33 (m, 19H), 0.91 (t,  $J = 7.5$  Hz, 6H).

**HRMS** (ESI)  $m/z$  calcd for  $\text{C}_{15}\text{H}_{30}\text{NO}_4^+$  [(M+H) $^+$ ] 288.2169, found 288.2187.

***tert*-Butyl (*S*)-4-(4-hydroxy-2,6-dimethylheptan-4-yl)-2,2-dimethyloxazolidine-3-carboxylate (2k).**

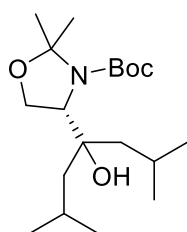

**2k**

The title compound was prepared according to the **general procedure 2** using **1a** (810 mg, 3.13 mmol) as the starting material. After purification by a flash column chromatography (silica gel: 5% ethyl acetate in petroleum ether), the product **2k** was obtained as a colorless oil (0.98 g, yield 91%).

**$^1\text{H NMR}$  (600 MHz, Chloroform-*d*)**  $\delta$  5.09 (s, 1H), 4.21 (d,  $J = 7.6$  Hz, 1H), 4.07 – 3.92 (m, 1H), 3.84 – 3.66 (m, 1H), 1.95 – 1.45 (m, 21H), 1.13 – 0.90 (m, 12H).

**HRMS** (ESI)  $m/z$  calcd for  $C_{19}H_{38}NO_4^+$  [(M+H)<sup>+</sup>] 344.2795, found 344.2797.

### III. Burgess Dehydration Reaction of Compound 2

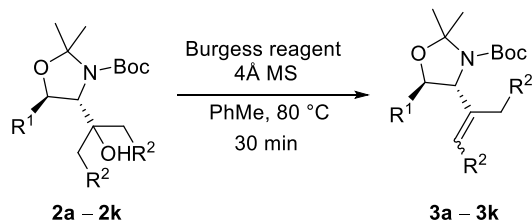

**General Procedure 3:** The synthesis of **3b – 3k** was adapted from procedures described by Reissig.<sup>4</sup> A 100 mL round-bottom flask charged with **2** (0.3 mmol, 1.0 equiv.), Burgess reagent (178.5 mg, 0.75 mmol, 2.5 equiv.) and 4Å molecular sieves (activated powder which had been further dried overnight at 140 °C in vacuo) was evacuated and backfilled with N<sub>2</sub> for three times before anhydrous toluene (10 mL) was added. The resulting mixture was heated to 80 °C and allowed to stir at this temperature for 30 min. Upon completion (detected by TLC or GCMS), the reaction solution was concentrated directly under reduced pressure. After purification by column chromatography (silica gel: 2% ethyl acetate in petroleum ether), the product **3** was isolated as a pale-yellow oil (yield: 61%–91%).

#### *tert*-Butyl (*R*)-4-(hept-3-en-4-yl)-2,2-dimethyloxazolidine-3-carboxylate (**3c**).

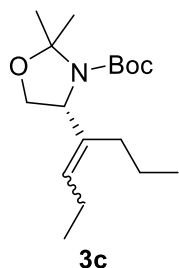

The title compound was prepared according to the **general procedure 3** using **2c** (1.73 g, 5.5 mmol) as the starting material. After purification by flash column chromatography (silica gel: 2% ethyl acetate in petroleum ether), the product **3c** was obtained as a pale-yellow oil (998 mg, yield 61%).

**<sup>1</sup>H NMR (400 MHz, Chloroform-*d*)** δ 5.28 – 5.19 (m, 1H), 4.38 – 3.99 (m, 2H), 3.75 – 3.57 (m, 1H), 2.08 – 1.97 (m, 2H), 1.70 – 1.57 (m, 3H), 1.56 – 1.31 (m, 16H), 0.97 – 0.88 (m, 6H).

**HRMS** (ESI)  $m/z$  calcd for  $C_{17}H_{32}NO_3^+$  [(M+H)<sup>+</sup>] 298.2377, found 298.2368.

#### *tert*-Butyl (4*R*,5*R*)-2,2,5-trimethyl-4-(prop-1-en-2-yl)oxazolidine-3-carboxylate

(3j).

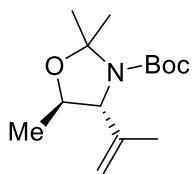

3j

The title compound was prepared according to the **general procedure 3** using **2j** (1.3 g, 4.76 mmol) as the starting material. After purification by a flash column chromatography (silica gel: 2% ethyl acetate in petroleum ether), the product **3j** was obtained as a pale-

yellow oil (0.87 g, yield 86%).

**<sup>1</sup>H NMR (400 MHz, Chloroform-*d*)**  $\delta$  4.85 (d,  $J = 25.6$  Hz, 2H), 3.93 – 3.44 (m, 2H), 1.66 – 1.30 (m, 18H), 1.21 (d,  $J = 5.5$  Hz, 3H).

**HRMS** (ESI)  $m/z$  calcd for  $C_{14}H_{25}NO_3Na^+$  [(M+Na)<sup>+</sup>] 278.1727, found 278.1742.

#### IV. Hydrogenation of Compound 3

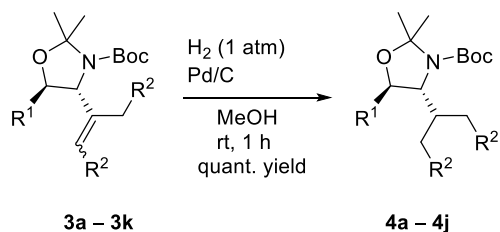

**General Procedure 4:** The synthesis of **4a – 4j** was adapted from procedures described by Hirota.<sup>5</sup> A 50 mL Schlenk flask was charged with MeOH (15 mL), Pd/C (10% Pd, 424 mg, H<sub>2</sub>O 55%), and **3a** (500 mg, 2.0 mmol, 1.0 equiv.). The stopcock of the Schlenk flask was closed and the side arm connected to a vacuum manifold. The flask was evacuated and back-filled with a balloon of hydrogen for three times, then the mixture was stirred at room temperature until the starting materials was consumed. At the end of the reaction, the mixture was transferred to a funnel filled with Celite for filtration to remove solid impurities and the cake was washed three times with ethyl acetate. Compounds **4** were obtained after the filtrate was concentrated by vacuum (yield: 94%–99%). Most of the alkenes can be hydrogenated using Pd/C (10% Pd, 10 wt %, H<sub>2</sub>O 55%).

***tert*-Butyl (*R*)-4-isopropyl-2,2-dimethyloxazolidine-3-carboxylate (**4a**).**



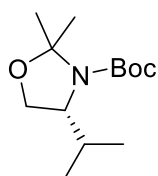

**4a**

The title compound was prepared according to the **general procedure 4**, using **3a** (2.0 mmol, 1.0 equiv.) as the starting material. The product **4a** was obtained as a colorless oil (0.48 g, 99%).

**<sup>1</sup>H NMR (400 MHz, Chloroform-*d*)**  $\delta$  3.87 – 3.61 (m, 3H), 2.20 – 1.97 (m, 1H), 1.62 – 1.40 (m, 15H), 0.96 – 0.81 (m, 6H).

**HRMS** (ESI)  $m/z$  calcd for C<sub>13</sub>H<sub>26</sub>NO<sub>3</sub><sup>+</sup> [(M+H)<sup>+</sup>] 244.1907, found 244.1877.

***tert*-Butyl (*R*)-2,2-dimethyl-4-(pentan-3-yl)oxazolidine-3-carboxylate (**4b**).**

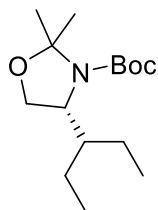

**4b**

The title compound was prepared according to the **general procedure 4**, using **3b** (2.0 mmol, 1.0 equiv.) as the starting material. The product **4b** was obtained as a colorless oil (0.54 g, 99%).

**<sup>1</sup>H NMR (400 MHz, Chloroform-*d*)**  $\delta$  4.09 – 3.70 (m, 3H), 1.85 – 1.35 (m, 20H), 0.88 (m, 6H).

**HRMS** (ESI)  $m/z$  calcd for C<sub>15</sub>H<sub>30</sub>NO<sub>3</sub><sup>+</sup> [(M+H)<sup>+</sup>] 272.2220, found 272.2215.

***tert*-Butyl (*R*)-4-(heptan-4-yl)-2,2-dimethyloxazolidine-3-carboxylate (**4c**).**

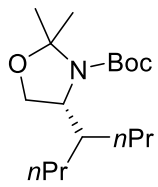

**4c**

The title compound was prepared according to the **general procedure 4**, using **3c** (2.0 mmol, 1.0 equiv.) as the starting material. The product was obtained as a colorless oil (0.60 g, 99%).

**<sup>1</sup>H NMR (400 MHz, Chloroform-*d*)**  $\delta$  4.03 – 3.72 (m, 3H), 1.96 – 1.77 (m, 1H), 1.63 – 1.22 (m, 23H), 0.86 (d,  $J = 6.5$  Hz, 6H).

**HRMS** (ESI)  $m/z$  calcd for C<sub>17</sub>H<sub>34</sub>NO<sub>3</sub><sup>+</sup> [(M+H)<sup>+</sup>] 300.2533, found 300.2512.

***tert*-Butyl (*R*)-2,2-dimethyl-4-(nonan-5-yl)oxazolidine-3-carboxylate (**4d**).**

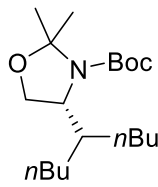

**4d**

The title compound was prepared according to the **general procedure 4**, using **3d** (2.0 mmol, 1.0 equiv.) as the starting material. The product **4d** was obtained as a colorless oil (0.65 g, 99%).

**<sup>1</sup>H NMR (400 MHz, Chloroform-*d*)**  $\delta$  4.03 – 3.74 (m, 3H), 1.95 – 1.74 (m, 1H), 1.65 – 1.12 (m, 27H), 0.85 (t,  $J = 6.7$  Hz, 6H).

**HRMS** (ESI)  $m/z$  calcd for C<sub>19</sub>H<sub>38</sub>NO<sub>3</sub><sup>+</sup> [(M+H)<sup>+</sup>] 328.2846, found 328.2848.

***tert*-Butyl (R)-2,2-dimethyl-4-(undecan-6-yl)oxazolidine-3-carboxylate (4e).**

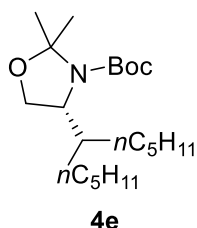

The title compound was prepared according to the **general procedure 4**, using **3e** (2.0 mmol, 1.0 equiv.) as the starting material.

The product **4e** was obtained as a colorless oil (0.67 g, 94%).

**<sup>1</sup>H NMR (400 MHz, Chloroform-*d*)** δ 4.44 – 3.53 (m, 3H), 1.96 – 1.70 (m, 1H), 1.65 – 1.13 (m, 31H), 0.84 (t, *J* = 6.8 Hz, 6H).

**HRMS** (ESI) *m/z* calcd for C<sub>21</sub>H<sub>42</sub>NO<sub>3</sub><sup>+</sup> [(M+H)<sup>+</sup>] 356.3159, found 356.3153.

***tert*-Butyl (R)-2,2-dimethyl-4-(tridecan-7-yl)oxazolidine-3-carboxylate (4f).**

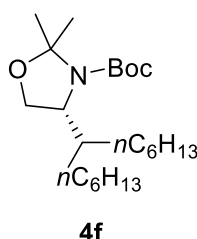

The title compound was prepared according to the **general procedure 4**, using **3f** (2.0 mmol, 1.0 equiv.) as the starting material.

The product **4f** was obtained as a colorless oil (0.73 g, 95%).

**<sup>1</sup>H NMR (400 MHz, Chloroform-*d*)** δ 4.00 – 3.72 (m, 3H), 1.83 (d, *J* = 43.8 Hz, 1H), 1.65 – 1.10 (m, 35H), 0.84 (t, *J* = 6.6 Hz, 6H).

**HRMS** (ESI) *m/z* calcd for C<sub>23</sub>H<sub>46</sub>NO<sub>3</sub><sup>+</sup> [(M+H)<sup>+</sup>] 384.3472, found 384.3479.

***tert*-Butyl (R)-4-(1,5-diphenylpentan-3-yl)-2,2-dimethyloxazolidine-3-carboxylate (4g).**

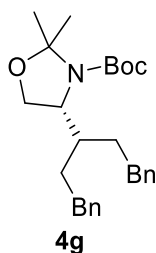

The title compound was prepared according to the **general procedure 4**, using **3g** (2.0 mmol, 1.0 equiv.) as the starting material. The product **4g** was obtained as a colorless oil (0.84 g, 99%).

**<sup>1</sup>H NMR (400 MHz, Chloroform-*d*)** δ 7.36 – 7.18 (m, 10H), 5.33 – 3.74 (m, 3H), 3.09 – 2.43 (m, 4H), 2.34 – 1.19 (m, 20H).

**HRMS** (ESI) *m/z* calcd for C<sub>27</sub>H<sub>38</sub>NO<sub>3</sub><sup>+</sup> [(M+H)<sup>+</sup>] 424.2846, found 424.2848.

***tert*-Butyl (R)-4-(2,8-dimethylnonan-5-yl)-2,2-dimethyloxazolidine-3-carboxylate (4h).**

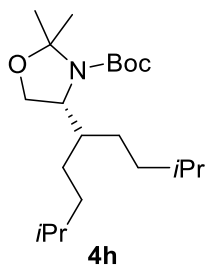

The title compound was prepared according to the **general procedure 4**, using **3h** (2.0 mmol, 1.0 equiv.) as the starting material.

The product **4h** was obtained as a colorless oil (0.70 g, 99%).

**<sup>1</sup>H NMR (400 MHz, Chloroform-*d*)**  $\delta$  4.06 – 3.73 (m, 3H), 1.91 – 1.67 (m, 1H), 1.64 – 0.93 (m, 25H), 0.82 (t,  $J = 7.3$  Hz, 12H).

**HRMS** (ESI)  $m/z$  calcd for  $C_{21}H_{42}NO_3^+$  [(M+H)<sup>+</sup>] 356.3159, found 356.3156.

***tert*-Butyl (*R*)-4-(1,7-dimethoxyheptan-4-yl)-2,2-dimethyloxazolidine-3-carboxylate (**4i**).**

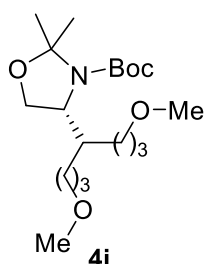

The title compound was prepared according to the **general procedure 4**, using **3i** (2.0 mmol, 1.0 equiv.) as the starting material.

The product **4i** was obtained as a colorless oil (0.71 g, 99%).

**<sup>1</sup>H NMR (400 MHz, Chloroform-*d*)**  $\delta$  3.96 – 3.72 (m, 3H), 3.38 – 3.17 (m, 10H), 1.92 – 1.73 (m, 1H), 1.70 – 1.03 (m, 23H).

**HRMS** (ESI)  $m/z$  calcd for  $C_{19}H_{38}NO_5^+$  [(M+H)<sup>+</sup>] 360.2744, found 360.2726.

***tert*-Butyl (4*R*,5*R*)-4-isopropyl-2,2,5-trimethyloxazolidine-3-carboxylate (**4j**).**

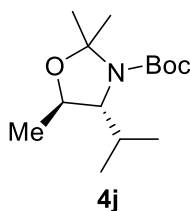

The title compound was prepared according to the **general procedure 4**, using **3j** (2.0 mmol, 1.0 equiv) as the starting material.

The product **4j** was obtained as a colorless oil (0.51 g, 99%).

**<sup>1</sup>H NMR (400 MHz, Chloroform-*d*)**  $\delta$  4.04 – 3.89 (m, 1H), 3.34 (d,  $J = 69.2$  Hz, 1H), 2.16 (d,  $J = 89.5$  Hz, 1H), 1.53 – 1.15 (m, 18H), 0.85 – 0.73 (m, 6H).

**HRMS** (ESI)  $m/z$  calcd for  $C_{14}H_{28}NO_3^+$  [(M+H)<sup>+</sup>] 258.2064, found 258.2059.

## V. Deprotection of Compound 4

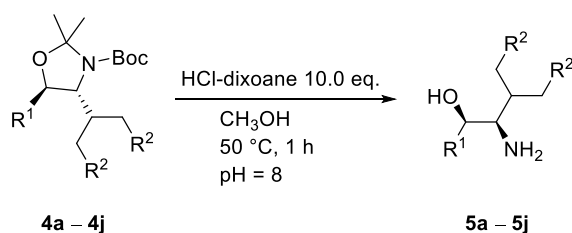

**General Procedure 5:** The deprotection of **4** was adapted from procedure described by Ledoussal.<sup>3</sup> A 50 mL Schlenk flask was charged with in MeOH (10 mL) and **4a** (2 mmol, 486 mg, 1.0 equiv.) at room temperature, 4 M HCl/dioxane (10 equiv.) was added. The reaction was stirred for 1 hour at 50 °C and the color turned light amber. After that it was cooled to room temperature and added concentrated sodium hydroxide solution to the reaction mixture until the pH = 8. The aqueous layer was extracted three times with a 3:1 mixture of CHCl<sub>3</sub>:*i*-PrOH. The organic layers were dried over MgSO<sub>4</sub>, filtered and concentrated in vacuo. The crude amino alcohol was purified by column chromatography using silica gel pre-saturated with 3% Et<sub>3</sub>N in EtOAc and eluting with 10% MeOH in DCM to obtain the product **5a** (202 mg, yield 98%).

**(*R*)-2-Amino-3-methylbutan-1-ol (5a).**

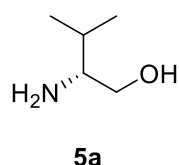

The title compound was prepared according to the **general procedure 5** using **4a** (486 mg, 2 mmol) as the starting material, and the product **5a** was obtained as a colorless oil (202 mg, yield 98%).

**<sup>1</sup>H NMR (400 MHz, Chloroform-*d*)** δ 3.57 (dd, *J* = 10.6, 3.8 Hz, 1H), 3.25 (dd, *J* = 10.6, 8.6 Hz, 1H), 2.51 (ddd, *J* = 8.5, 6.3, 3.8 Hz, 1H), 2.41 (s, 2H), 1.61 – 1.47 (m, *J* = 6.8 Hz, 1H), 0.86 (dd, *J* = 6.8, 4.2 Hz, 6H).

**<sup>13</sup>C NMR (101 MHz, Chloroform-*d*)** δ 64.6, 58.5, 31.2, 19.4, 18.4.

## Ee and dr Determination of the Chiral Amino Alcohols

The ee or dr of the chiral amino alcohols was determined after converting them to their corresponding benzamides.

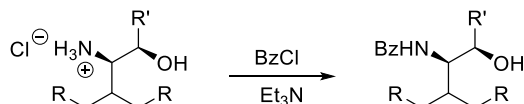

**General procedure 6:** The crude amino alcohol hydrochloride product was obtained by deprotection of **4** (0.3 mmol, 1.0 equiv.) according to **general procedure 5**, and it was not necessary to carry out the next purification to participate directly in the reaction. The crude amino alcohol hydrochloride was placed in a round bottom flask containing 10 ml of dichloromethane at 0 °C, and triethylamine (0.9 mmol, 3.0 equiv.) and benzoyl

chloride (0.3 mmol, 1.0 equiv.) were added in turn. After they were added into the reaction mixture dropwise, the reaction was allowed to warm to room temperature and stirred for 30 min. After completion of the reaction (monitored by TLC), it was quenched by sodium bicarbonate aqueous solution, and the mixture was extracted with ethyl acetate (50 mL × 3). The combined organic layer was dried over anhydrous Na<sub>2</sub>SO<sub>4</sub>, filtered and concentrated in vacuo. The crude product was purified by silica gel column chromatography (yields over two steps: 74%–91%).

**(R)-N-(3-Ethyl-1-hydroxypentan-2-yl)benzamide (6b).**

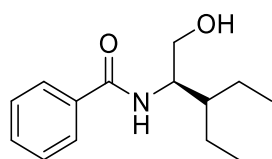

**6b**

The title compound was prepared according to the **general procedure 5 and 6** using **4b** (81.3 mg, 0.3 mmol) as the starting material of the first step, and the product **6b** was obtained as a white solid (56.6 mg, over 2 steps: 80% yield, >99% ee).

**<sup>1</sup>H NMR (600 MHz, Chloroform-*d*)** δ 7.73 (d, *J* = 7.2 Hz, 2H), 7.45 (t, *J* = 7.4 Hz, 1H), 7.36 (t, *J* = 7.6 Hz, 2H), 6.61 (d, *J* = 8.7 Hz, 1H), 4.38 – 4.05 (m, 1H), 3.93 – 3.52 (m, 2H), 1.65 – 1.52 (m, 1H), 1.51 – 1.23 (m, 4H), 0.89 (t, *J* = 7.5 Hz, 6H).

**<sup>13</sup>C NMR (151 MHz, Chloroform-*d*)** δ 168.5, 134.6, 131.6, 128.6, 127.0, 63.8, 53.8, 41.7, 22.1, 21.8, 11.4, 11.1.

**HRMS** (ESI) *m/z* calcd for C<sub>14</sub>H<sub>22</sub>NO<sub>2</sub><sup>+</sup> [(M+H)<sup>+</sup>] 236.1645, found 236.1644.

[α]<sub>D</sub><sup>26</sup> = +1.7 (*c* = 1, CHCl<sub>3</sub>); >99% ee.

M.p. : 83.4 – 85.1 °C.

**HPLC analysis** CHIRALCEL IC-H column, 10% *i*PrOH in hexanes, 1.0 mL/min, 254 nm UV detector, *t*<sub>R</sub> (minor) = 15.2 min, *t*<sub>R</sub> (major) = 16.1 min.

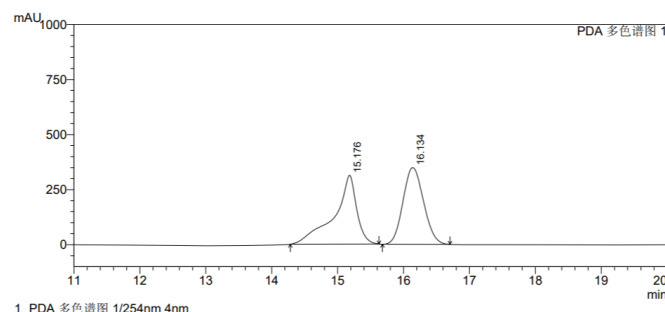

1 PDA 多色谱图 1/254nm 4nm

Ch1 254nm 4nm

| Peak# | Retention Time | Area     | Height | Area %  | Height % |
|-------|----------------|----------|--------|---------|----------|
| 1     | 15.176         | 7448957  | 312589 | 49.604  | 47.290   |
| 2     | 16.134         | 7568004  | 348421 | 50.396  | 52.710   |
| 总计    |                | 15016961 | 661010 | 100.000 | 100.000  |

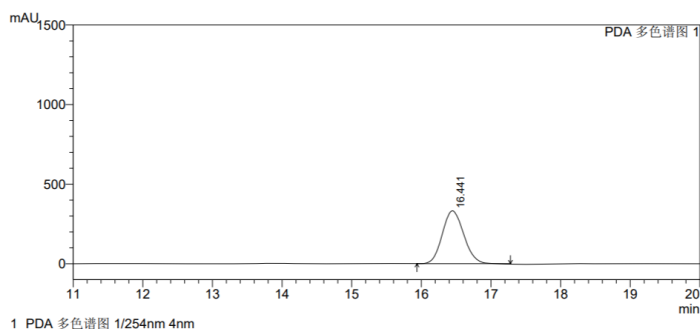

1 PDA 多色谱图 1/254nm 4nm

| Ch1 254nm 4nm |                 |         |        |         |          |
|---------------|-----------------|---------|--------|---------|----------|
| Peak#         | Resolution Time | Area    | Height | Area %  | Height % |
| 1             | 16.441          | 7106185 | 332071 | 100.000 | 100.000  |
| 总计            |                 | 7106185 | 332071 | 100.000 | 100.000  |

**(R)-N-(1-Hydroxy-3-propylhexan-2-yl)benzamide (6c).**

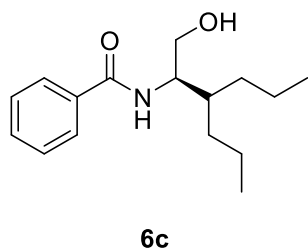

The title compound was prepared according to the **general procedure 5 and 6** using **4c** (89.7 mg, 0.3 mmol) as the starting material of the first step, and the product **6c** was obtained as a white solid (69.0 mg, over 2 steps: 87% yield, 98% ee).

**$^1\text{H NMR}$  (600 MHz, Chloroform-*d*)**  $\delta$  7.72 (d,  $J = 7.7$  Hz, 2H), 7.45 (t,  $J = 7.5$  Hz, 1H), 7.36 (t,  $J = 7.6$  Hz, 2H), 6.54 (d,  $J = 8.5$  Hz, 1H), 4.19 – 4.13 (m, 1H), 3.71 (d,  $J = 5.4$  Hz, 2H), 3.66 – 3.54 (m, 1H), 1.75 – 1.69 (m, 1H), 1.42 – 1.24 (m, 8H), 0.88 (t,  $J = 6.8$  Hz, 6H).

**$^{13}\text{C NMR}$  (151 MHz, Chloroform-*d*)**  $\delta$  168.6, 134.6, 131.6, 128.6, 127.0, 63.9, 54.4, 38.6, 32.8, 32.3, 20.4, 20.1, 14.5.

**HRMS** (ESI)  $m/z$  calcd for  $\text{C}_{16}\text{H}_{27}\text{NO}_2^+$  [(M+H) $^+$ ] 264.1958, found 264.1959.

$[\alpha]_{\text{D}}^{26} = +0.3$  ( $c = 1$ ,  $\text{CHCl}_3$ ); 98% ee.

M.p. : 78.1 – 80.3 °C.

**HPLC analysis** CHIRALCEL IC-H column, 10% *i*PrOH in hexanes, 1.0 mL/min, 254 nm UV detector,  $t_{\text{R}}$  (minor) = 17.9 min,  $t_{\text{R}}$  (major) = 22.1 min

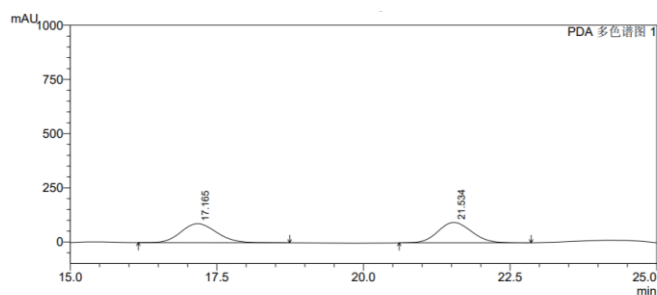

1 PDA 多色谱图 1/254nm 4nm

Ch1 254nm 4nm

| Peak# | Resolution Time | Area    | Height | Area %  | Height % |
|-------|-----------------|---------|--------|---------|----------|
| 1     | 17.165          | 3684188 | 87438  | 49.861  | 48.260   |
| 2     | 21.534          | 3704725 | 93744  | 50.139  | 51.740   |
| 总计    |                 | 7388912 | 181182 | 100.000 | 100.000  |

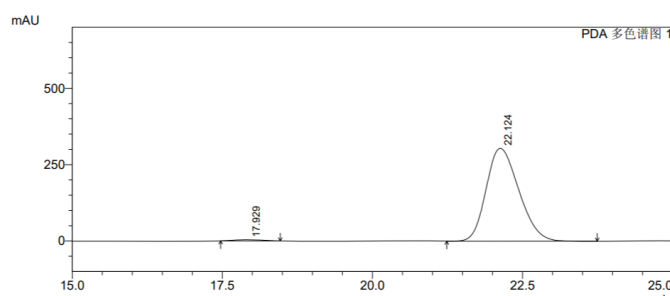

1 PDA 多色谱图 1/254nm 4nm

Ch1 254nm 4nm

| Peak# | Resolution Time | Area     | Height | Area %  | Height % |
|-------|-----------------|----------|--------|---------|----------|
| 1     | 17.929          | 133974   | 4075   | 1.150   | 1.323    |
| 2     | 22.124          | 11516343 | 304024 | 98.850  | 98.677   |
| 总计    |                 | 11650317 | 308099 | 100.000 | 100.000  |

**(R)-N-(3-butyl-1-hydroxyheptan-2-yl)benzamide (6d).**

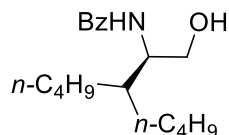

**6d**

The title compound was prepared according to the **general procedure 5** and **6** using **4d** (98.1 mg, 0.3 mmol) as the starting material of the first step, and the product **6d** was obtained as a white solid (79.4 mg, over 2 steps: 91% yield, 97% ee).

**<sup>1</sup>H NMR (600 MHz, Chloroform-*d*)**  $\delta$  7.71 (d,  $J = 7.5$  Hz, 2H), 7.43 (t,  $J = 7.4$  Hz, 1H), 7.34 (t,  $J = 7.7$  Hz, 2H), 6.60 (d,  $J = 8.5$  Hz, 1H), 4.19 – 4.12 (m, 1H), 3.71 (d,  $J = 5.0$  Hz, 2H), 1.88 – 1.64 (m, 1H), 1.58 – 1.13 (m, 12H), 0.87 (q,  $J = 6.9$  Hz, 6H).

**<sup>13</sup>C NMR (151 MHz, Chloroform-*d*)**  $\delta$  168.6, 134.6, 131.5, 128.6, 127.0, 63.8, 54.4, 38.9, 30.1, 29.7, 29.4, 29.0, 23.1, 14.1.

**HRMS** (ESI)  $m/z$  calcd for  $C_{18}H_{30}NO_2^+$  [(M+H)<sup>+</sup>] 292.2271, found 292.2273.

$[\alpha]_D^{26} = +0.22$  ( $c = 1$ ,  $\text{CHCl}_3$ ); 97% ee.

M.p. : 101 – 102 °C.

**HPLC analysis** CHIRALCEL IC-H column, 10% *i*PrOH in hexanes, 1.0 mL/min, 254 nm UV detector,  $t_R$  (minor) = 6.8 min,  $t_R$  (major) = 7.9 min.

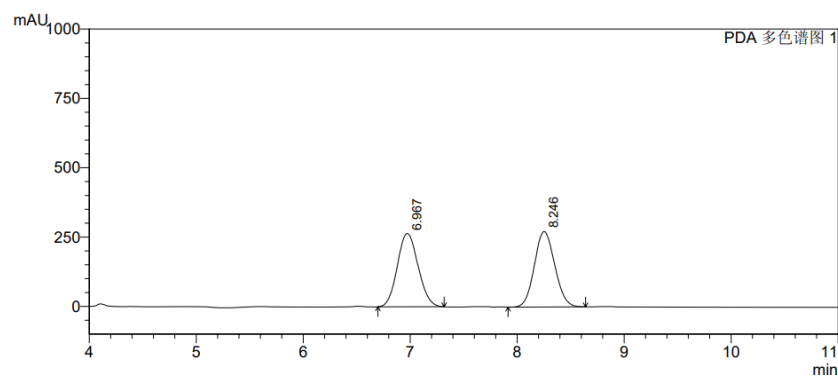

1 PDA 多色谱图 1/254nm 4nm

**Ch1 254nm 4nm**

| Peak# | Resolution Time | Area    | Height | Area %  | Height % |
|-------|-----------------|---------|--------|---------|----------|
| 1     | 6.967           | 3569062 | 264333 | 49.752  | 49.248   |
| 2     | 8.246           | 3604583 | 272400 | 50.248  | 50.752   |
| 总计    |                 | 7173645 | 536733 | 100.000 | 100.000  |

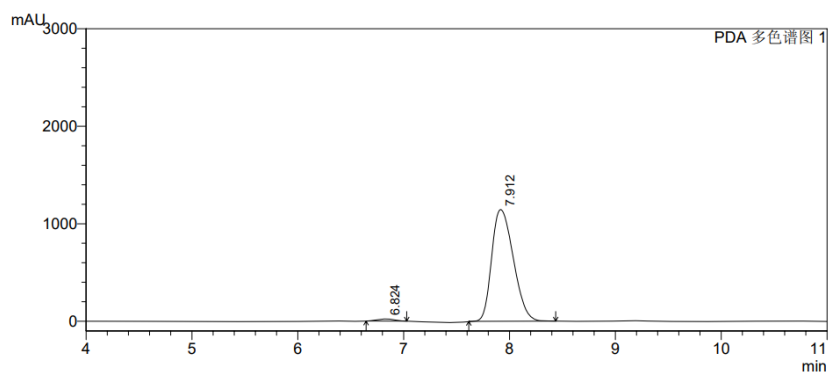

1 PDA 多色谱图 1/254nm 4nm

**Ch1 254nm 4nm**

| Peak# | Resolution Time | Area     | Height  | Area %  | Height % |
|-------|-----------------|----------|---------|---------|----------|
| 1     | 6.824           | 250171   | 21933   | 1.511   | 1.877    |
| 2     | 7.912           | 16309696 | 1146566 | 98.489  | 98.123   |
| 总计    |                 | 16559867 | 1168499 | 100.000 | 100.000  |

**(R)-N-(1-Hydroxy-3-pentyl octan-2-yl)benzamide (6e).**

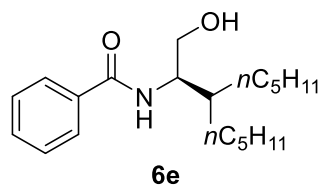

The title compound was prepared according to the **general procedure 5 and 6** using **4e** (106.5 mg, 0.3 mmol) as the starting material of the first step, and the product **6e** was obtained as a white solid (81.6 mg, over 2 steps: 85% yield,

96% ee).



**$^1\text{H}$  NMR (600 MHz, Chloroform-*d*)**  $\delta$  7.71 (d,  $J = 7.7$  Hz, 2H), 7.43 (t,  $J = 7.3$  Hz, 1H), 7.34 (t,  $J = 7.6$  Hz, 2H), 6.61 (d,  $J = 8.5$  Hz, 1H), 4.22 – 4.12 (m, 1H), 3.71 (d,  $J = 5.1$  Hz, 2H), 1.69 (s, 1H), 1.35 – 1.19 (m, 16H), 0.88 – 0.83 (m, 6H).

**$^{13}\text{C}$  NMR (151 MHz, Chloroform-*d*)**  $\delta$  168.6, 134.6, 131.5, 128.6, 127.1, 63.8, 54.4, 38.9, 32.3, 30.3, 29.9, 26.9, 26.5, 22.7, 14.1.

**HRMS** (ESI)  $m/z$  calcd for  $\text{C}_{20}\text{H}_{34}\text{NO}_2^+$  [(M+H) $^+$ ] 320.2584, found 320.2585.

$[\alpha]_{\text{D}}^{26} = +0.9$  ( $c = 1$ ,  $\text{CHCl}_3$ ); 97% ee.

M.p. : 89.2 – 90.6 °C.

**HPLC analysis** CHIRALCEL IC-H column, 10% *i*PrOH in hexanes, 1.0 mL/min, 254 nm UV detector,  $t_{\text{R}}$  (minor) = 5.9 min,  $t_{\text{R}}$  (major) = 6.9 min.

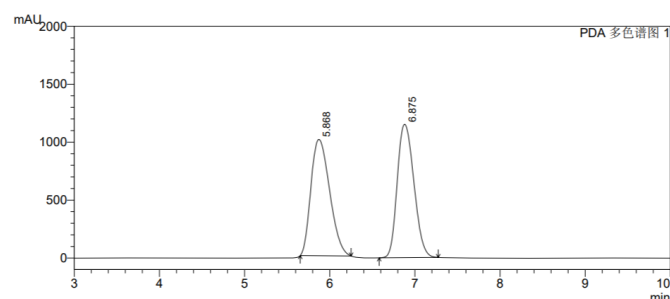

1 PDA 多色谱图 1/254nm 4nm

**Ch1 254nm 4nm**

| Peak# | Resolution Time | Area     | Height  | Area %  | Height % |
|-------|-----------------|----------|---------|---------|----------|
| 1     | 5.868           | 15380682 | 1003260 | 49.521  | 46.551   |
| 2     | 6.875           | 15678302 | 1151939 | 50.479  | 53.449   |
| 总计    |                 | 31058984 | 2155198 | 100.000 | 100.000  |

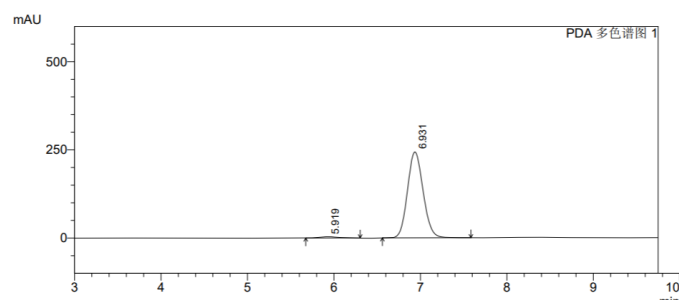

1 PDA 多色谱图 1/254nm 4nm

**Ch1 254nm 4nm**

| Peak# | Resolution Time | Area    | Height | Area %  | Height % |
|-------|-----------------|---------|--------|---------|----------|
| 1     | 5.919           | 50018   | 3431   | 1.611   | 1.389    |
| 2     | 6.931           | 3054622 | 243582 | 98.389  | 98.611   |
| 总计    |                 | 3104641 | 247013 | 100.000 | 100.000  |

**(*R*)-*N*-(3-Hexyl-1-hydroxynonan-2-yl)benzamide (6f).**

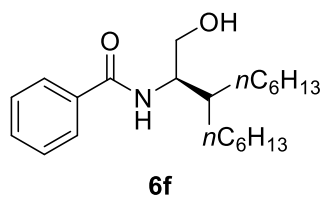

The title compound was prepared according to the **general procedure 5** and **6** using **4f** (115 mg, 0.3 mmol) as the starting material of the first step, and the product **6f** was obtained as a white solid (88.0 mg, over 2 steps: 85% yield,

96% ee).

**<sup>1</sup>H NMR (600 MHz, Chloroform-*d*)**  $\delta$  7.76 (d,  $J = 7.6$  Hz, 2H), 7.51 (t,  $J = 7.4$  Hz, 1H), 7.43 (t,  $J = 7.5$  Hz, 2H), 6.32 (d,  $J = 3.6$  Hz, 1H), 4.29 – 4.13 (m, 1H), 3.94 – 3.66 (m, 2H), 1.69 (d,  $J = 5.6$  Hz, 1H), 1.54 – 1.13 (m, 20H), 1.02 – 0.78 (m, 6H).

**<sup>13</sup>C NMR (151 MHz, Chloroform-*d*)**  $\delta$  168.8, 134.6, 131.8, 128.8, 127.1, 64.8, 54.8, 39.3, 31.9, 30.6, 30.1, 29.8, 29.8, 27.4, 27.0, 22.8, 22.8, 14.2.

**HRMS** (ESI)  $m/z$  calcd for  $C_{22}H_{38}NO_2^+$  [(M+H)<sup>+</sup>] 348.2897, found 348.2896.

$[\alpha]_D^{26} = +2.5$  ( $c = 1$ ,  $CHCl_3$ ); 96% ee.

M.p. : 65.9 – 67.8 °C.

**HPLC analysis** CHIRALCEL IC-H column, 10% *i*PrOH in hexanes, 1.0 mL/min, 254 nm UV detector,  $t_R$  (minor) = 5.4 min,  $t_R$  (major) = 11.6 min.

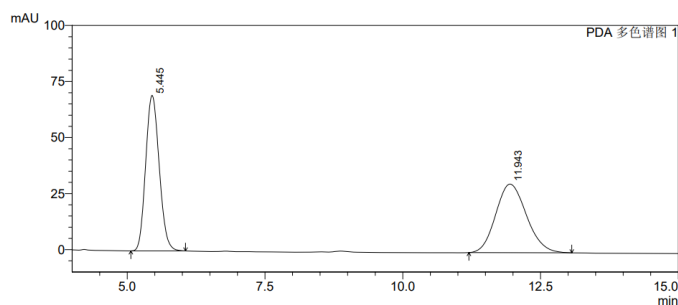

Ch1 254nm 4nm

| Peak# | Resolution Time | Area    | Height | Area %  | Height % |
|-------|-----------------|---------|--------|---------|----------|
| 1     | 5.445           | 1184974 | 69425  | 50.008  | 69.416   |
| 2     | 11.943          | 1184611 | 30588  | 49.992  | 30.584   |
| 总计    |                 | 2369586 | 100013 | 100.000 | 100.000  |

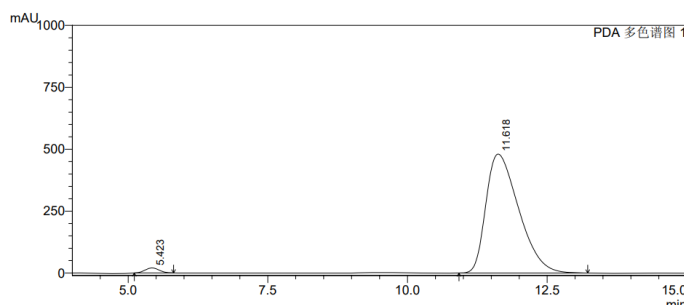

Ch1 254nm 4nm

| Peak# | Resolution Time | Area     | Height | Area %  | Height % |
|-------|-----------------|----------|--------|---------|----------|
| 1     | 5.423           | 354445   | 20214  | 1.774   | 4.037    |
| 2     | 11.618          | 19619997 | 480492 | 98.226  | 95.963   |
| 总计    |                 | 19974442 | 500707 | 100.000 | 100.000  |

**(R)-N-(1-Hydroxy-3-phenethyl-5-phenylpentan-2-yl)benzamide (6g).**

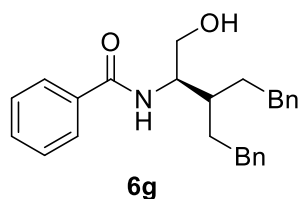

The title compound was prepared according to the **general procedure 5 and 6** using **4g** (127 mg, 0.3 mmol) as the starting material of the first step, and the product **6g** was obtained as a white solid (88.0 mg, over 2 steps: 76% yield,

89% ee).

**<sup>1</sup>H NMR (600 MHz, Chloroform-*d*)**  $\delta$  7.69 (d,  $J = 7.7$  Hz, 2H), 7.58 – 7.06 (m, 13H), 6.45 (d,  $J = 8.6$  Hz, 1H), 4.46 – 4.23 (m, 1H), 3.74 (d,  $J = 5.0$  Hz, 2H), 2.96 – 2.51 (m, 4H), 1.92 – 1.57 (m, 5H).

**<sup>13</sup>C NMR (151 MHz, Chloroform-*d*)**  $\delta$  168.6, 142.2, 142.2, 134.4, 131.7, 128.6, 128.5, 128.5, 128.5, 127.0, 126.0, 63.6, 53.8, 38.1, 33.3, 33.2, 32.5, 32.1.

**HRMS** (ESI)  $m/z$  calcd for  $C_{26}H_{30}NO_2^+$  [(M+H)<sup>+</sup>] 388.2271, found 388.2269.

$[\alpha]_D^{26} = +0.2$  ( $c = 1$ ,  $CHCl_3$ ); 89% ee.

M.p. : 108.5 – 110.3 °C.

**HPLC analysis** CHIRALCEL IC-H column, 10% *i*PrOH in hexanes, 1.0 mL/min, 254 nm UV detector,  $t_R$  (minor) = 11.4 min,  $t_R$  (major) = 13.2 min.

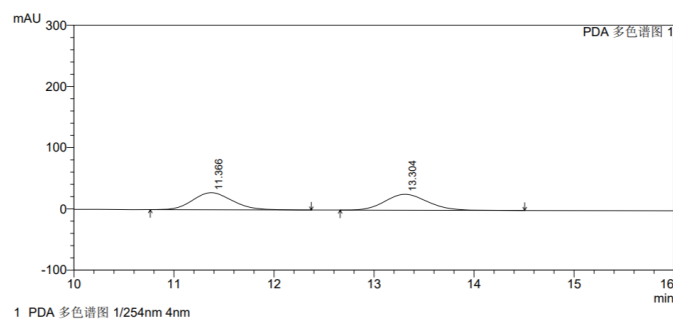

1 PDA 多色谱图 1/254nm 4nm

Ch1 254nm 4nm

| Peak# | Resolution Time | Area    | Height | Area %  | Height % |
|-------|-----------------|---------|--------|---------|----------|
| 1     | 11.366          | 767044  | 27899  | 49.904  | 51.790   |
| 2     | 13.304          | 770007  | 25970  | 50.096  | 48.210   |
| 总计    |                 | 1537051 | 53869  | 100.000 | 100.000  |

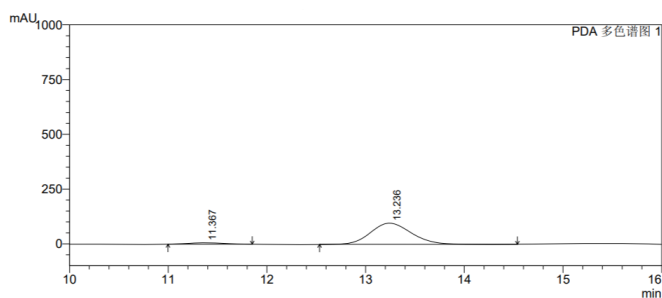

1 PDA 多色谱图 1/254nm 4nm

Ch1 254nm 4nm

| Peak# | Resolution Time | Area    | Height | Area %  | Height % |
|-------|-----------------|---------|--------|---------|----------|
| 1     | 11.367          | 157833  | 6401   | 5.379   | 6.216    |
| 2     | 13.236          | 2776242 | 96574  | 94.621  | 93.784   |
| 总计    |                 | 2934075 | 102976 | 100.000 | 100.000  |

**(R)-N-(1-Hydroxy-3-isopentyl-6-methylheptan-2-yl)benzamide (6h).**

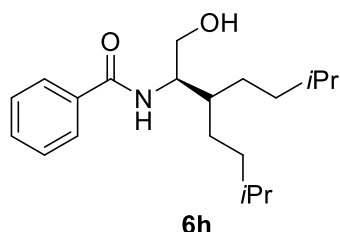

The title compound was prepared according to the **general procedure 5 and 6** using **4h** (106.5 mg, 0.3 mmol) as the starting material of the first step, and the product **6h** was obtained as a white solid (71 mg, over 2 steps: 74% yield, 96% ee).

**<sup>1</sup>H NMR (600 MHz, Chloroform-*d*)**  $\delta$  7.71 (d,  $J = 7.6$  Hz, 2H), 7.44 (t,  $J = 7.3$  Hz, 1H), 7.34 (t,  $J = 7.6$  Hz, 2H), 6.59 (d,  $J = 8.4$  Hz, 1H), 4.16 (t,  $J = 6.7$  Hz, 1H), 3.72 (d,  $J = 4.7$  Hz, 2H), 1.71 – 1.63 (m, 1H), 1.49 – 1.15 (m, 10H), 0.88 – 0.82 (m, 12H).

**<sup>13</sup>C NMR (151 MHz, Chloroform-*d*)**  $\delta$  168.6, 134.6, 131.5, 128.6, 127.0, 63.8, 54.4, 39.2, 36.3, 35.89, 28.4, 27.9, 27.5, 22.8, 22.5.

**HRMS** (ESI)  $m/z$  calcd for  $C_{20}H_{34}NO_2^+$  [(M+H)<sup>+</sup>] 320.2584, found 320.2576.

$[\alpha]_D^{26} = +1.8$  ( $c = 1$ ,  $CHCl_3$ ); 96% ee.

M.p. : 68.1 – 75.4 °C.

**HPLC analysis** CHIRALCEL IC-H column, 10% *i*PrOH in hexanes, 1.0 mL/min, 254 nm UV detector,  $t_R$  (minor) = 5.8 min,  $t_R$  (major) = 7.4 min.

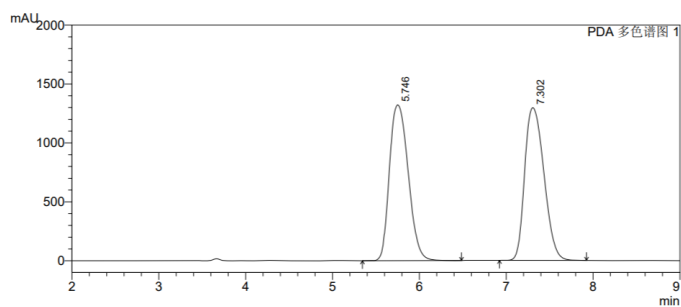

1 PDA 多色谱图 1/254nm 4nm

Ch1 254nm 4nm

| Peak# | Resolution Time | Area     | Height  | Area %  | Height % |
|-------|-----------------|----------|---------|---------|----------|
| 1     | 5.746           | 19867272 | 1322594 | 49.873  | 50.516   |
| 2     | 7.302           | 19968294 | 1295587 | 50.127  | 49.484   |
| 总计    |                 | 39835566 | 2618181 | 100.000 | 100.000  |

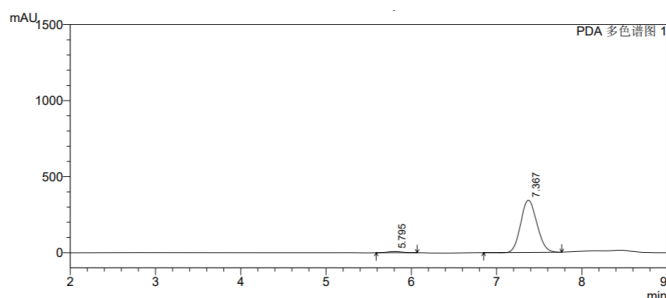

1 PDA 多色谱图 1/254nm 4nm

Ch1 254nm 4nm

| Peak# | Resolution Time | Area    | Height | Area %  | Height % |
|-------|-----------------|---------|--------|---------|----------|
| 1     | 5.795           | 93543   | 7540   | 2.032   | 2.153    |
| 2     | 7.367           | 4510655 | 342678 | 97.968  | 97.847   |
| 总计    |                 | 4604198 | 350217 | 100.000 | 100.000  |

**(R)-N-(1-Hydroxy-6-methoxy-3-(3-methoxypropyl)hexan-2-yl)benzamide (6i).**

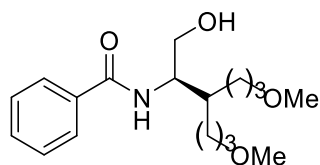

**6i**

The title compound was prepared according to the **general procedure 5** and **6** using **4i** (107.7 mg, 0.3 mmol) as the starting material of the first step, and the product **6i** was obtained as a white solid (85.5 mg, over 2 steps: 88% yield, >99% ee).

**<sup>1</sup>H NMR (600 MHz, Chloroform-*d*)**  $\delta$  7.70 (d,  $J = 7.7$  Hz, 2H), 7.40 (t,  $J = 7.4$  Hz, 1H), 7.31 (t,  $J = 7.6$  Hz, 2H), 6.82 (d,  $J = 8.4$  Hz, 1H), 4.14 – 4.07 (m, 1H), 3.70 – 3.64 (m, 2H), 3.35 – 3.27 (m, 4H), 3.23 (d,  $J = 2.9$  Hz, 6H), 1.74 – 1.31 (m, 9H).

**<sup>13</sup>C NMR (151 MHz, Chloroform-*d*)**  $\delta$  168.3, 134.5, 131.4, 128.4, 127.0, 72.8, 72.7, 63.1, 58.4, 58.4, 54.2, 38.2, 26.9, 26.7, 26.5.

**HRMS** (ESI)  $m/z$  calcd for  $C_{18}H_{30}NO_4^+$  [(M+H)<sup>+</sup>] 324.2169, found 324.2169.

$[\alpha]_D^{26} = +1.9$  ( $c = 1$ ,  $CHCl_3$ ); >99% ee.

M.p. : 76.5 – 78.1 °C.

**HPLC analysis** CHIRALCEL IC-H column, 20% *i*PrOH in hexanes, 1.0 mL/min, 254 nm UV detector,  $t_R$  (major) = 20.1 min,  $t_R$  (minor) = 28.6 min.

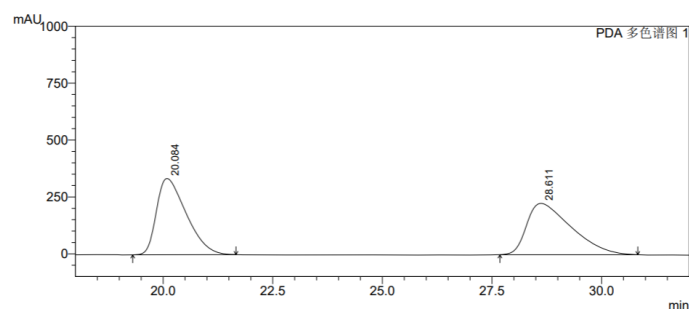

Ch1 254nm 4nm

| Peak# | Retention Time | Area     | Height | Area %  | Height % |
|-------|----------------|----------|--------|---------|----------|
| 1     | 20.084         | 15805228 | 335061 | 49.817  | 59.750   |
| 2     | 28.611         | 15921573 | 225712 | 50.183  | 40.250   |
| 总计    |                | 31726801 | 560773 | 100.000 | 100.000  |

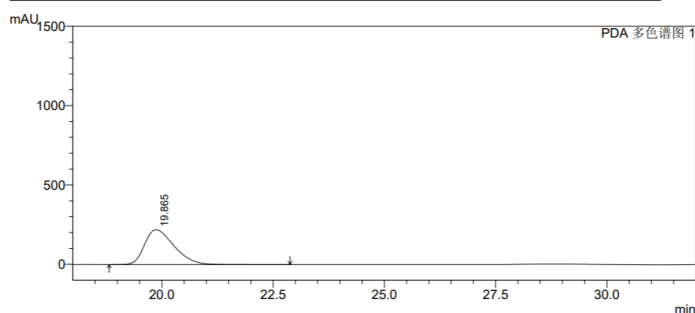

Ch1 254nm 4nm

| Peak# | Retention Time | Area     | Height | Area %  | Height % |
|-------|----------------|----------|--------|---------|----------|
| 1     | 19.865         | 10111291 | 219800 | 100.000 | 100.000  |
| 总计    |                | 10111291 | 219800 | 100.000 | 100.000  |

***N*-((2*R*,3*R*)-2-Hydroxy-4-methylpentan-3-yl)benzamide (**6j**).**

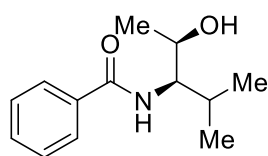

**6j**

The title compound was prepared according to the **general procedure 5 and 6** using **4j** (77.1 mg, 0.3 mmol) as the starting material of the first step, and the product **6j** was obtained as a white solid (59.3 mg, over 2 steps: 89% yield, dr > 99:1).

**<sup>1</sup>H NMR (600 MHz, Chloroform-*d*)**  $\delta$  7.77 (d,  $J = 7.7$  Hz, 2H), 7.46 (t,  $J = 7.4$  Hz, 1H), 7.37 (t,  $J = 7.6$  Hz, 2H), 6.70 (dd,  $J = 10.2, 5.5$  Hz, 1H), 4.15 – 4.09 (m, 1H), 3.67 (t,  $J = 10.4$  Hz, 1H), 3.18 – 3.00 (m, 1H), 2.01 – 1.92 (m, 1H), 1.17 (d,  $J = 6.4$  Hz, 3H), 1.01 (d,  $J = 6.7$  Hz, 3H), 0.96 (d,  $J = 6.8$  Hz, 3H).

**<sup>13</sup>C NMR (151 MHz, Chloroform-*d*)**  $\delta$  168.5, 168.5, 134.6, 131.5, 128.5, 127.0, 66.4, 60.5, 60.5, 30.2, 21.4, 19.9, 19.6.

**HRMS** (ESI)  $m/z$  calcd for  $C_{13}H_{20}NO_2^+$  [(M+H)<sup>+</sup>] 222.1489, found 222.1480.

$[\alpha]_D^{26} = +4.5$  ( $c = 1$ ,  $\text{CHCl}_3$ );  $\text{dr} > 99:1$ .

M.p. : 118.7 – 119.5 °C.

**HPLC analysis** CHIRALCEL IC-H column, 10% *i*PrOH in hexanes, 1.0 mL/min, 254 nm UV detector,  $t_R$  (diastereomer and enantiomer) = 8.3 min,  $t_R$  (**6j**) = 8.8 min.

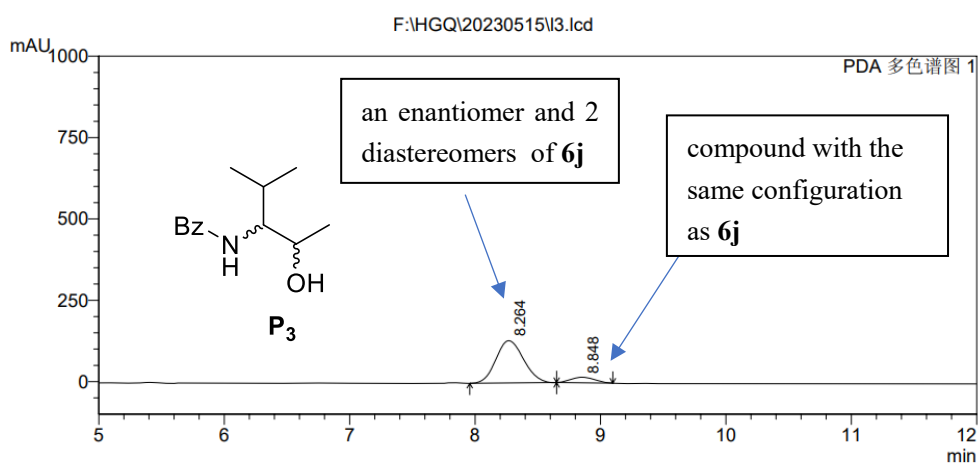

Ch1 254nm 4nm

| Peak# | Resolution Time | Area    | Height | Area %  | Height % |
|-------|-----------------|---------|--------|---------|----------|
| 1     | 8.264           | 1990615 | 130119 | 89.808  | 88.271   |
| 2     | 8.848           | 225910  | 17290  | 10.192  | 11.729   |
| 总计    |                 | 2216526 | 147408 | 100.000 | 100.000  |

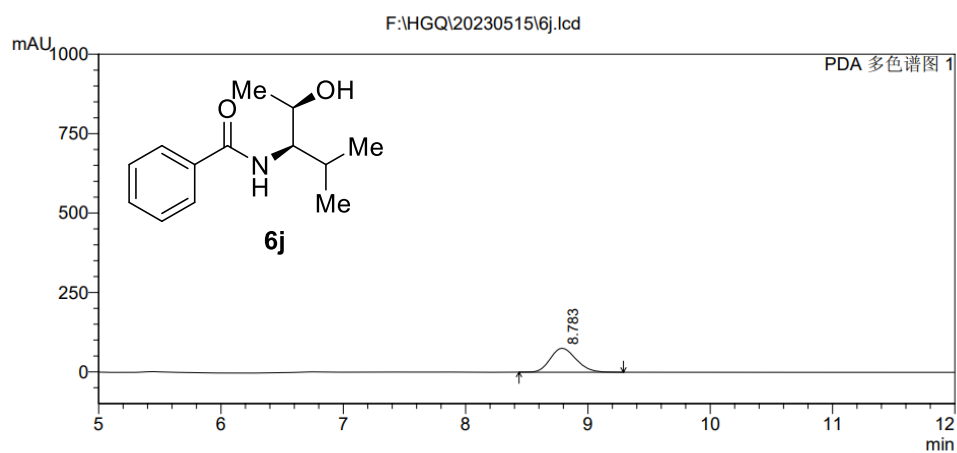

Ch1 254nm 4nm

| Peak# | Resolution Time | Area    | Height | Area %  | Height % |
|-------|-----------------|---------|--------|---------|----------|
| 1     | 8.783           | 1100620 | 75282  | 100.000 | 100.000  |
| 总计    |                 | 1100620 | 75282  | 100.000 | 100.000  |

**Synthesis of the reference compound for **6j**:**

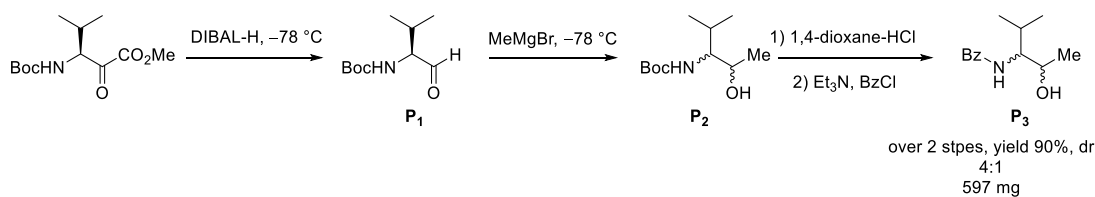

### Scheme S2 Preparation of reference compound **P<sub>3</sub>**.

Reference compound **P<sub>3</sub>** was prepared through 4 steps: 1. DIBAL-H reduction;<sup>6</sup> 2. Grignard reaction;<sup>7</sup> 3. Deprotection (**General Procedure 5**); 4. Amidation (**General Procedure 6**). (Scheme S2)

#### *tert*-Butyl (*S*)-(3-methyl-1-oxobutan-2-yl)carbamate (**P<sub>1</sub>**).

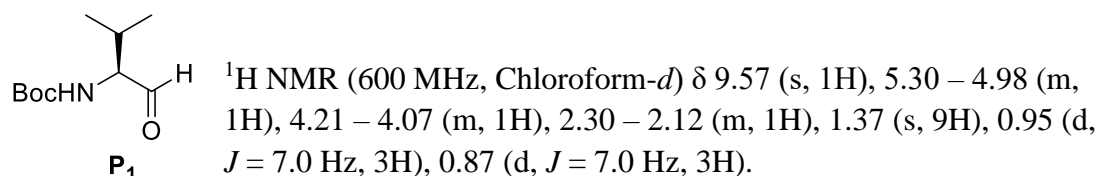

#### *tert*-Butyl (2-hydroxy-4-methylpentan-3-yl)carbamate (**P<sub>2</sub>**).

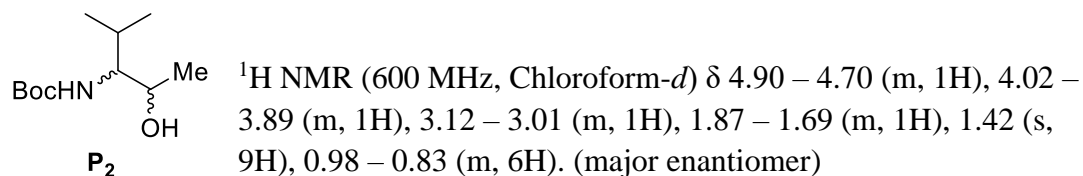

#### *N*-(2-Hydroxy-4-methylpentan-3-yl)benzamide (**P<sub>3</sub>**).

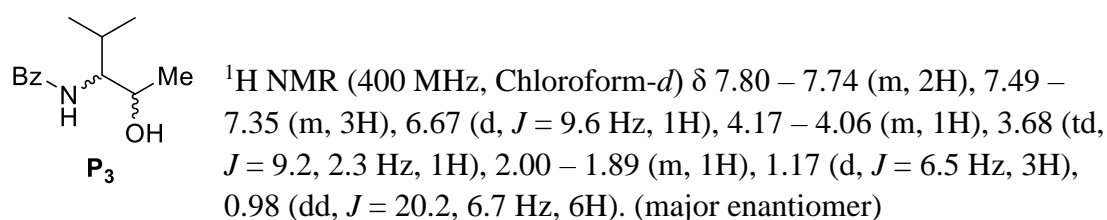



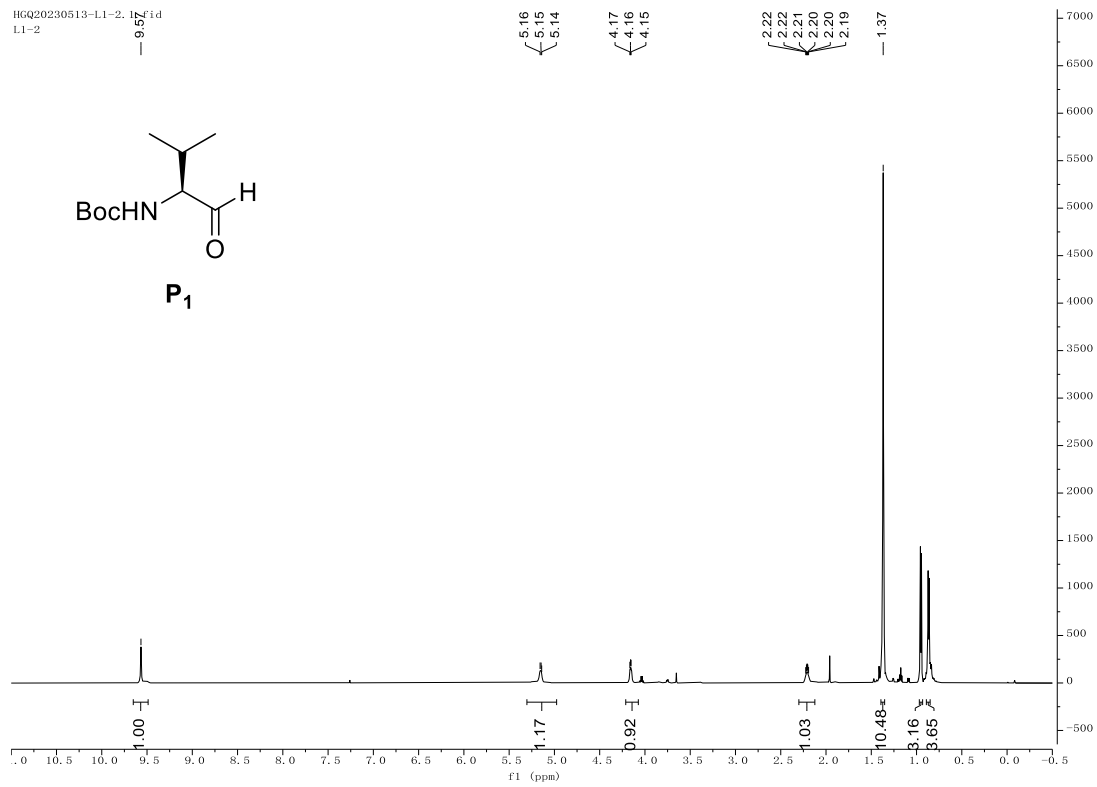

<sup>1</sup>H NMR (600 MHz, CDCl<sub>3</sub>) spectrum for **P<sub>1</sub>**

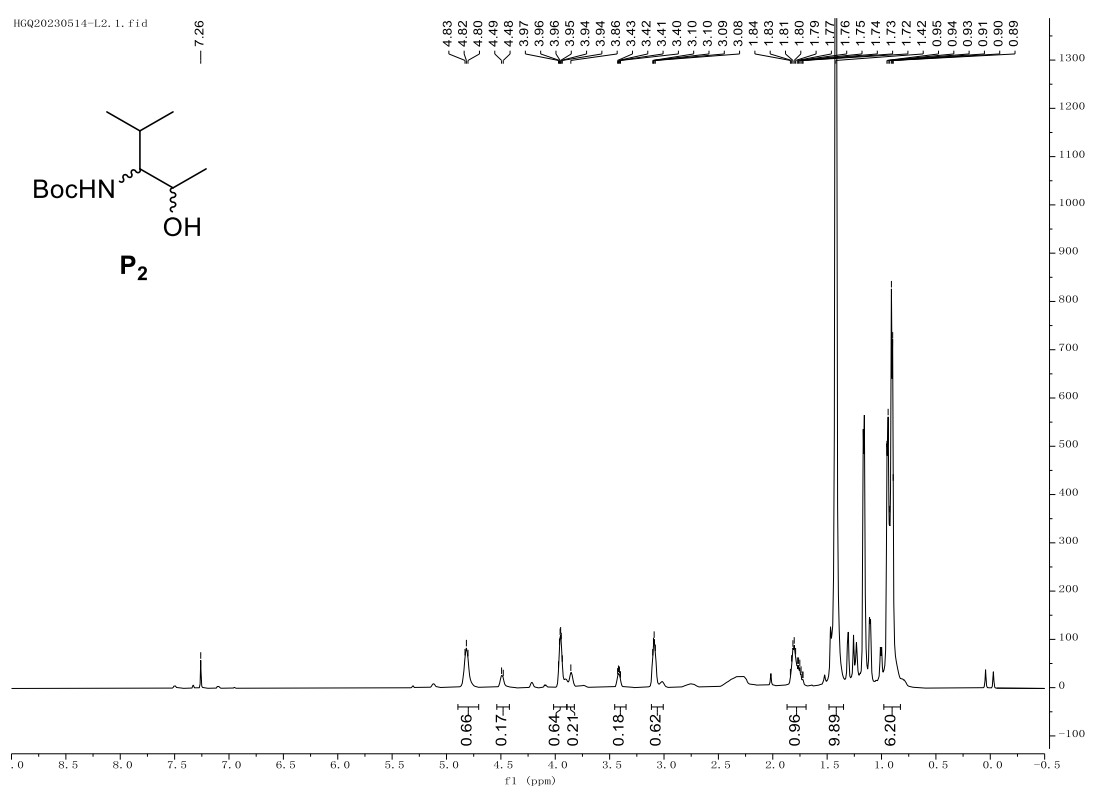

<sup>1</sup>H NMR (600 MHz, CDCl<sub>3</sub>) spectrum for **P<sub>2</sub>**

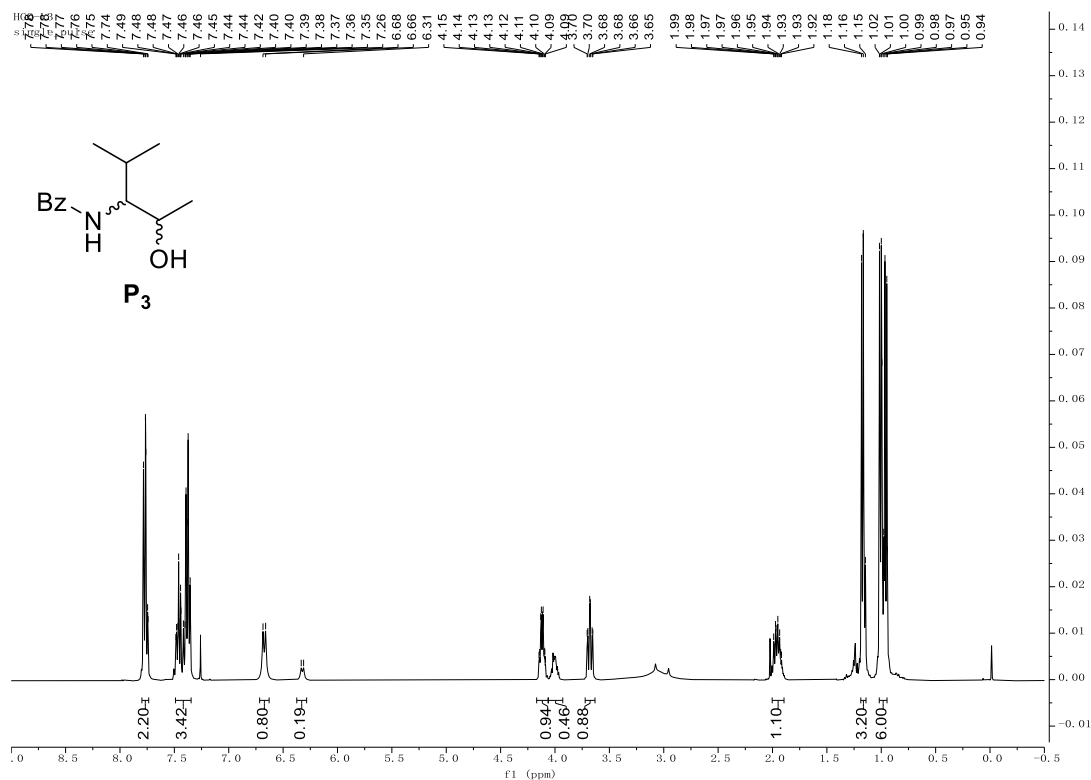

$^1\text{H}$  NMR (600 MHz,  $\text{CDCl}_3$ ) spectrum for the reference compound **P3**.

## Synthetic Route B

Synthetic route B to chiral amino alcohols:

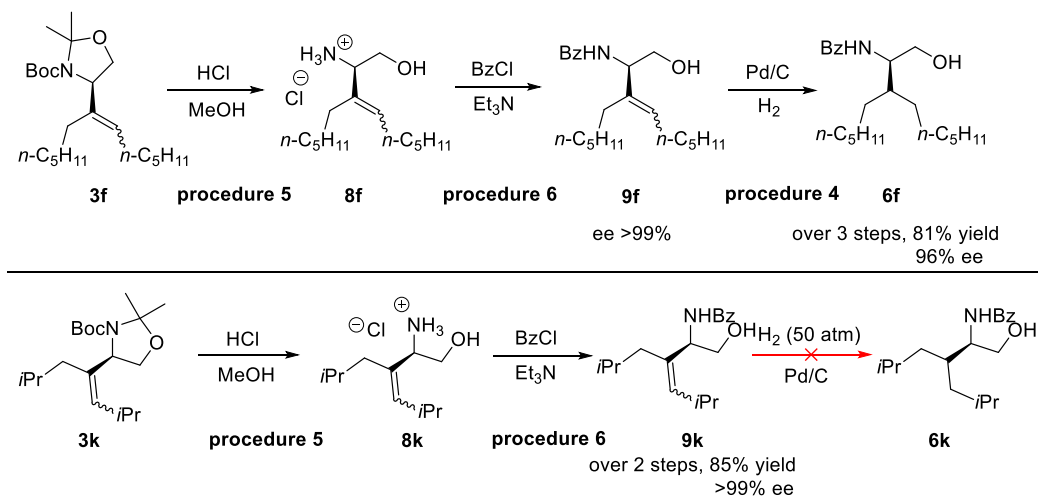

Scheme S3 Synthetic route B.

Synthetic route B used the same sub-procedure as route A (**General Procedure 4, 5** and **6**) start from compound **3**, but it used these reactions in an order of **General**

## Procedure 5 to 6 to 4.

### (*R*)-*N*-(3-Hexyl-1-hydroxynon-3-en-2-yl)benzamide (**9f**).

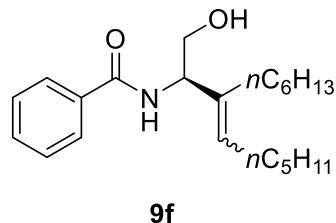

The title compound was prepared according to the **general procedure 5** and **6** using **3f** (106 mg, 0.3 mmol) as the starting material of the first step, and the product **9f** was obtained as a white solid (80.0 mg, over 2 steps: 77% yield, >99% ee).

**<sup>1</sup>H NMR (600 MHz, Chloroform-*d*)**  $\delta$  7.76 (d,  $J = 7.7$  Hz, 2H), 7.53 – 7.43 (m, 1H), 7.43 – 7.34 (m, 2H), 6.69 (d,  $J = 22.4$  Hz, 1H), 5.61 – 5.31 (m, 1H), 4.72 – 4.42 (m, 1H), 3.73 (t,  $J = 4.3$  Hz, 2H), 2.25 – 1.90 (m, 4H), 1.60 – 1.13 (m, 14H), 0.96 – 0.76 (m, 6H).

**<sup>13</sup>C NMR (151 MHz, Chloroform-*d*)**  $\delta$  167.9, 136.9, 134.4, 131.7, 128.7, 127.5, 127.1, 64.7, 56.5, 31.7, 29.9, 29.63, 29.6, 28.9, 27.8, 22.7, 22.6, 14.1, 14.1.

**HRMS** (ESI)  $m/z$  calcd for  $C_{22}H_{36}NO_2^+$  [(M+H)<sup>+</sup>] 346.2741, found 346.2740.

$[\alpha]_D^{26} = +1.1$  ( $c = 1$ ,  $CHCl_3$ ); >99% ee.

M.p. : 64.7 – 66.9 °C.

**HPLC analysis** CHIRALCEL OD-H column, 3% *i*PrOH in hexanes, 1.0 mL/min, 254 nm UV detector,  $t_R$  (major) = 40.5 min,  $t_R$  (minor) = 47.7 min.

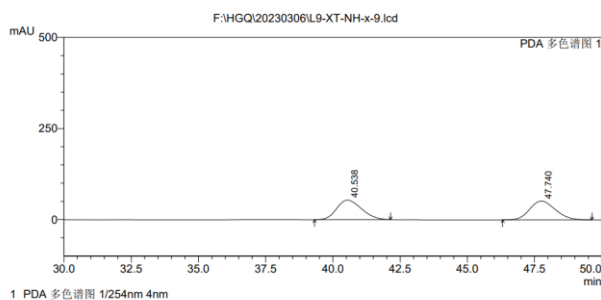

Ch1 254nm 4nm

| Peak# | Resolution Time | Area    | Height | Area %  | Height % |
|-------|-----------------|---------|--------|---------|----------|
| 1     | 40.538          | 3465229 | 53797  | 50.330  | 51.024   |
| 2     | 47.740          | 3419783 | 51637  | 49.670  | 48.976   |
| 总计    |                 | 6885012 | 105434 | 100.000 | 100.000  |

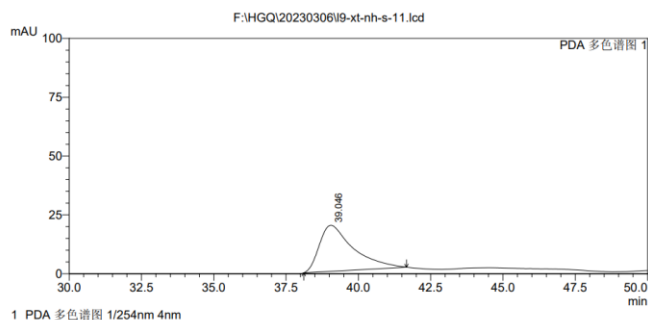

1 PDA 多色谱图 1/254nm 4nm

| Ch1 254nm 4nm |                 |         |        |         |          |
|---------------|-----------------|---------|--------|---------|----------|
| Peak#         | Resolution Time | Area    | Height | Area %  | Height % |
| 1             | 39.046          | 1596536 | 19577  | 100.000 | 100.000  |
| 总计            |                 | 1596536 | 19577  | 100.000 | 100.000  |

**(R)-N-(1-Hydroxy-3-isobutyl-5-methylhex-3-en-2-yl)benzamide (9k).**

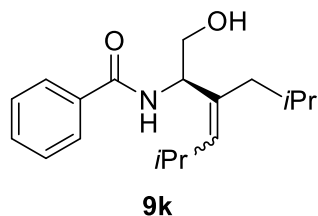

The title compound was prepared according to the **general procedure 5 and 6** using **3k** (98 mg, 0.3 mmol) as the starting material of the first step, the product **9k** was obtained as a white solid (78.3 mg, over 2 steps: 90% yield, >99% ee).

**<sup>1</sup>H NMR (600 MHz, Chloroform-*d*)**  $\delta$  7.77 – 7.70 (m, 2H), 7.49 – 7.42 (m, 1H), 7.41 – 7.33 (m, 2H), 6.74 – 6.61 (m, 1H), 5.24 (d,  $J = 9.7$  Hz, 1H), 4.59 – 4.51 (m, 1H), 3.77 – 3.60 (m, 2H), 3.47 – 3.30 (m, 1H), 2.76 – 2.52 (m, 1H), 2.11 – 2.03 (m, 1H), 1.92 – 1.76 (m, 2H), 0.97 – 0.84 (m, 12H).

**<sup>13</sup>C NMR (151 MHz, Chloroform-*d*)**  $\delta$  168.0, 135.5, 134.4, 133.6, 131.6, 128.6, 127.0, 64.8, 55.7, 39.0, 27.2, 27.0, 23.3, 23.1, 22.8, 22.5.

**HRMS** (ESI)  $m/z$  calcd for  $C_{18}H_{28}NO_2^+$  [(M+H)<sup>+</sup>] 290.2115, found 290.2117.

$[\alpha]_D^{26} = +3.6$  ( $c = 1$ ,  $CHCl_3$ ); > 99% ee.

M.p. : 86.6 – 88.2 °C.

**HPLC analysis** CHIRALCEL OD-H column, 5% *i*PrOH in hexanes, 0.5 mL/min, 254 nm UV detector,  $t_R$  (minor) = 25.7 min,  $t_R$  (major) = 29.8 min.

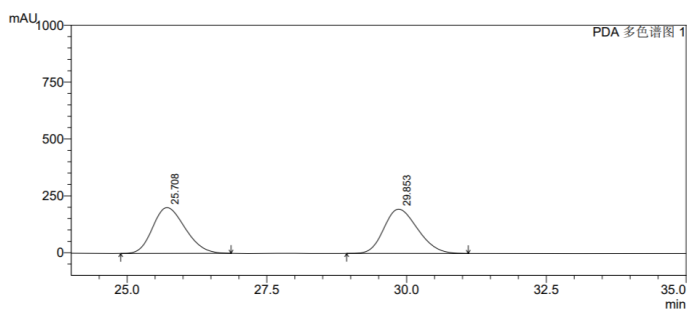

1 PDA 多色谱图 1/254nm 4nm

Ch1 254nm 4nm

| Peak# | Resolution Time | Area     | Height | Area %  | Height % |
|-------|-----------------|----------|--------|---------|----------|
| 1     | 25.708          | 8179207  | 201593 | 49.848  | 50.845   |
| 2     | 29.853          | 8229076  | 194892 | 50.152  | 49.155   |
| 总计    |                 | 16408282 | 396485 | 100.000 | 100.000  |

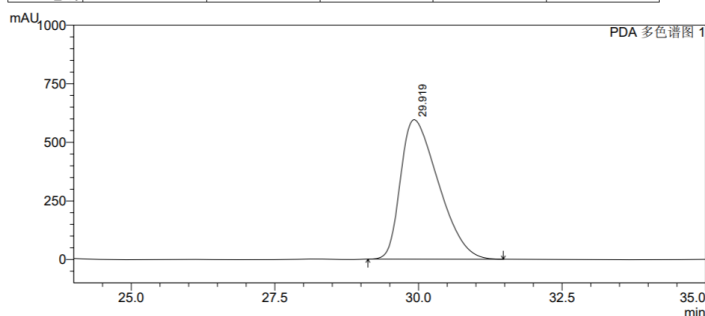

1 PDA 多色谱图 1/254nm 4nm

Ch1 254nm 4nm

| Peak# | Resolution Time | Area     | Height | Area %  | Height % |
|-------|-----------------|----------|--------|---------|----------|
| 1     | 29.919          | 27311699 | 595136 | 100.000 | 100.000  |
| 总计    |                 | 27311699 | 595136 | 100.000 | 100.000  |

## Synthetic Route C

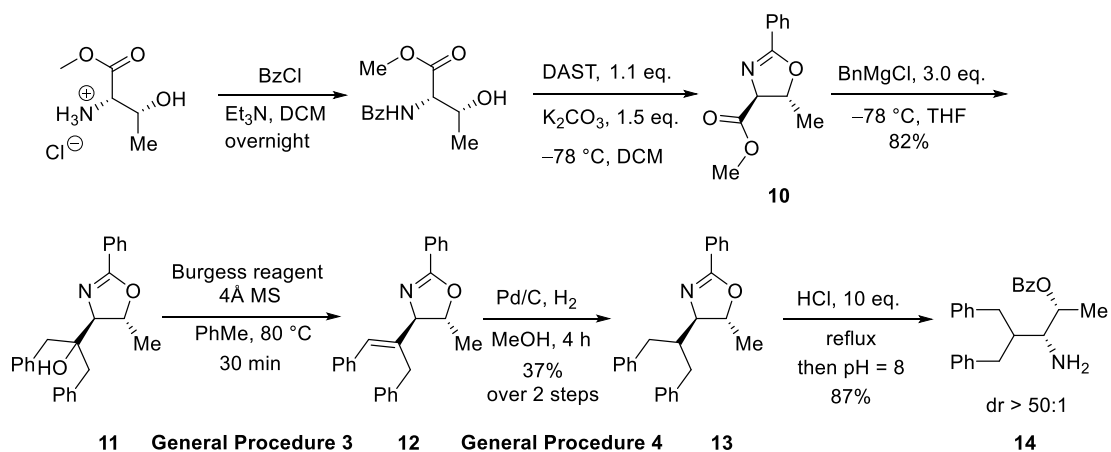

### Scheme S4 Preparation of 12.

2-((4*R*,5*R*)-5-Methyl-2-phenyl-4,5-dihydrooxazol-4-yl)-1,3-diphenylpropan-2-ol (11).

A method of two-step preparation of compound **10** was reported by Pàmies.<sup>8</sup> The NMR spectra of **10** and **11** have been reported by Pfaltz.<sup>9</sup> **10** (1.5 g, 6.8mmol, 1.0 equiv.) was dissolved in anhydrous tetrahydrofuran (50 mL) at  $-78$  °C. A solution of benzyl magnesium chloride (1.0 M, 20.5 mL, 20.5 mmol, 3.0 equiv.) was added slowly. After completion of the addition, the reaction mixture was slowly stirred at room temperature for 4 hours. After the raw material was completely consumed (monitored by TLC), the reaction mixture was poured into 10 mL mixture of  $\text{NH}_4\text{Cl}$  aqueous solution and ice to quench the reaction. The mixture was further diluted with water and extracted with ethyl acetate (50 mL  $\times$  3). The combined organic layer was dried over anhydrous  $\text{Na}_2\text{SO}_4$ , filtered and concentrated in vacuo. The crude product was purified by flash chromatography (silica gel: 10% ethyl acetate/petroleum ether and 1% triethylamine), and the product **11** was obtained as a colorless oil (2.1 g, yield 82%).

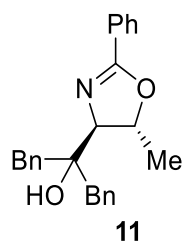

**$^1\text{H NMR}$  (600 MHz, Chloroform-*d*)**  $\delta$  8.10 – 8.05 (m, 2H), 7.54 – 7.44 (m, 3H), 7.41 – 7.27 (m, 10H), 4.92 – 4.80 (m, 1H), 4.18 – 4.15 (m, 1H), 3.24 (d,  $J = 13.8$  Hz, 1H), 3.16 (d,  $J = 13.9$  Hz, 1H), 2.99 (d,  $J = 13.8$  Hz, 1H), 2.74 (d,  $J = 13.8$  Hz, 1H), 2.15 (s, 1H), 1.77 (dd,  $J = 6.9, 1.1$  Hz, 3H).

**(4R,5R)-4-(1,3-Diphenylprop-1-en-2-yl)-5-methyl-2-phenyl-4,5-dihydrooxazole (12).**

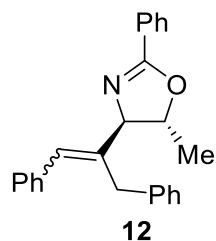

The title compound was prepared according to the **general procedure 3**, and the product **12** was obtained as a colorless oil (yield see compound **13**).

**$^1\text{H NMR}$  (600 MHz, Chloroform-*d*)**  $\delta$  8.06 – 7.90 (m, 2H), 7.53 – 7.38 (m, 3H), 7.36 – 7.09 (m, 10H), 6.22 (s, 1H), 5.44 (d,  $J = 10.0$  Hz, 1H), 5.02 – 4.89 (m, 1H), 3.61 (dd,  $J = 16.7, 1.8$  Hz, 1H), 3.38 (dd,  $J = 16.8, 1.7$  Hz, 1H), 1.54 (d,  $J = 6.7$  Hz, 3H).

**$^{13}\text{C NMR}$  (151 MHz, Chloroform-*d*)**  $\delta$  164.2, 139.6, 137.6, 131.4, 130.4, 129.9, 128.4, 128.4, 128.3, 128.2, 127.9, 126.7, 126.1, 79.9, 68.8, 39.9, 16.4.

**HRMS** (ESI)  $m/z$  calcd for  $C_{25}H_{24}NO^+$  [(M+H)<sup>+</sup>] 354.1852, found 354.1849.

**(4*R*,5*R*)-4-(1,3-Diphenylpropan-2-yl)-5-methyl-2-phenyl-4,5-dihydrooxazole (13).**

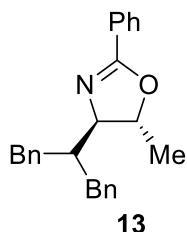

The title compound was prepared according to the **general procedure 4** using **12** (186 mg, 0.5 mmol) as the starting material, and the product **13** was obtained as a white solid (66.0 mg, over 2 steps, yield 37%).

**<sup>1</sup>H NMR (600 MHz, Chloroform-*d*)**  $\delta$  7.93 (d,  $J = 7.5$  Hz, 2H), 7.46 – 7.30 (m, 3H), 7.24 – 7.15 (m, 6H), 7.15 – 7.06 (m, 4H), 4.72 – 4.65

(m, 1H), 4.09 – 4.04 (m, 1H), 2.89 – 2.82 (m, 1H), 2.68 – 2.57 (m, 2H), 2.57 – 2.45 (m, 1H), 2.23 (s, 1H), 1.43 (d,  $J = 6.7$  Hz, 3H).

**<sup>13</sup>C NMR (151 MHz, Chloroform-*d*)**  $\delta$  163.5, 141.0, 140.7, 131.3, 129.6, 129.4, 128.5, 128.5, 128.4, 128.4, 126.1, 126.1, 79.2, 68.5, 42.6, 37.2, 36.5, 14.8.

**HRMS** (ESI)  $m/z$  calcd for  $C_{25}H_{26}NO^+$  [(M+H)<sup>+</sup>] 356.2009, found 356.2005.

$[\alpha]_D^{26} = +4.1$  ( $c = 1$ ,  $CHCl_3$ ).

M.p. : 66.7 – 69.5 °C.

**(2*R*,3*R*)-3-Amino-4-benzyl-5-phenylpentan-2-yl benzoate (14).**

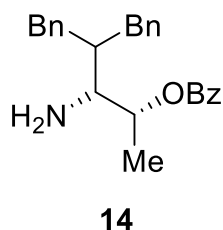

The title compound was prepared according to the **General procedure 5** using **13** (35.6 mg, 0.1 mmol) as the starting material, and the product **14** was obtained as a pale-yellow oil (32.5 mg, yield 87%, dr > 50:1). The diastereomeric ratio (dr) was determined based on the characteristic NMR peak of the  $\alpha$ -H of OBz group

(5.19 ppm).

**<sup>1</sup>H NMR (400 MHz, Chloroform-*d*)**  $\delta$  8.00 – 7.93 (m, 2H), 7.60 – 7.55 (m, 1H), 7.44 (t,  $J = 7.8$  Hz, 2H), 7.27 – 7.10 (m, 8H), 7.06 (d,  $J = 7.1$  Hz, 2H), 5.28 – 5.13 (m, 1H), 2.98 (dd,  $J = 13.2, 3.4$  Hz, 1H), 2.84 (dd,  $J = 8.0, 2.5$  Hz, 1H), 2.73 – 2.64 (m, 1H), 2.64 – 2.53 (m, 1H), 2.42 (dd,  $J = 13.2, 10.6$  Hz, 1H), 2.36 – 2.22 (m, 1H), 1.32 (d,  $J = 6.2$  Hz, 3H).

**<sup>13</sup>C NMR (101 MHz, Chloroform-*d*)**  $\delta$  166.0, 140.9, 133.1, 130.5, 129.7, 129.4, 129.1, 128.6, 128.5, 128.47, 126.1, 72.8, 55.4, 43.2, 36.4, 35.1, 17.6.

**HRMS** (ESI)  $m/z$  calcd for  $C_{25}H_{28}NO_2^+$  [(M+H)<sup>+</sup>] 374.2115, found 374.2110.

# Synthesis of Ligands

## I. Synthesis of *i*Pr-BiOx

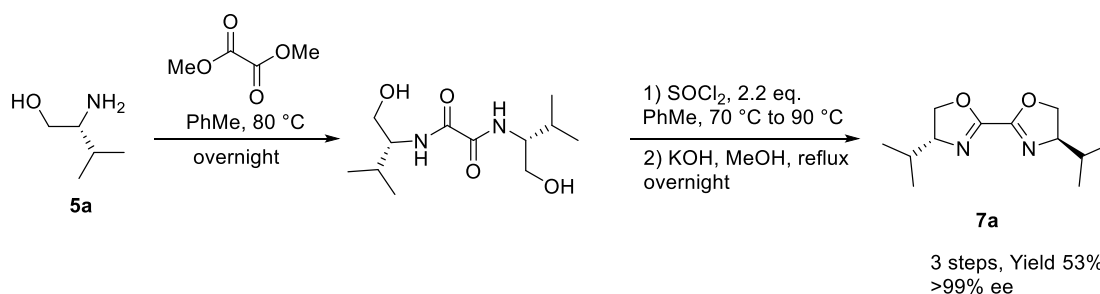

### Scheme S5 Preparation of **7a**.

The synthesis of **7a** was adapted from procedures described by Reisman.<sup>10</sup> **5a** (2 equiv., 198 mg, 1.9 mmol) and dimethyloxalate (112 mg, 0.95 mmol, 1 equiv.) were dissolved in dry PhMe (20 mL) and heated to 80 °C. The reaction was allowed to stir overnight with the diamide precipitating out of solution as a white solid. Reaction was cooled to room temperature and concentrated in vacuo to afford the crude diol as a sticky white solid. The crude diol was added PhMe (60 mL) and heated to 70 °C, whereupon thionyl chloride (249 mg, 2.1 mmol, 2.2 equiv.) was added. Reaction was stirred at 70 °C for 0.5 h then heated to 90 °C for 1.5 h. The reaction was cooled to room temperature and poured into 20% KOH solution cooled to 0 °C. The aqueous layer was separated and extracted (3 × 20 mL) with DCM and the combined organic layers were washed with 20% KOH solution, NaHCO<sub>3</sub> and brine. The organic layer was dried over Na<sub>2</sub>SO<sub>4</sub>, filtered through a pad of Celite, and concentrated in vacuo to afford the dichloride as a sticky brown solid. The crude dichloride was immediately dissolved in MeOH (9 mL) and KOH (133 mg, 2.4 mmol, 2.5 equiv.) was added. The reaction was heated to reflux for 14 hours. The reaction was cooled to room temperature and concentrated to remove MeOH. The crude mixture was loaded directly onto a silica gel column and eluted with 10–40% EtOAc/PE. The pure ligand was obtained as an off-white solid (113 mg, 53% yield over 3 steps, >99% ee).



**(4*R*,4'*R*)-4,4'-Diisopropyl-4,4',5,5'-tetrahydro-2,2'-bioxazole (7a).**

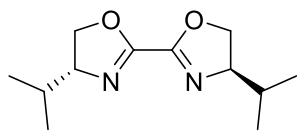

**7a**

**<sup>1</sup>H NMR (400 MHz, Chloroform-*d*)** δ 4.59 – 4.31 (m, 2H), 4.20 – 3.96 (m, 4H), 2.00 – 1.67 (m, *J* = 6.8 Hz, 2H), 0.98 (d, *J* = 6.8 Hz, 6H), 0.88 (d, *J* = 6.8 Hz, 6H).

**<sup>13</sup>C NMR (101 MHz, Chloroform-*d*)** δ 154.6, 73.2, 71.1,

32.5, 19.0, 18.3.

*R*<sub>f</sub> = 0.2 (silica gel, 20% EtOAc/PE, UV).

**HPLC analysis** CHIRALCEL IC-H column, 10% *i*PrOH in hexanes, 1.0 mL/min,

254 nm UV detector, *t*<sub>R</sub> (minor) = 18.5 min, *t*<sub>R</sub> (major) = 24.1 min.

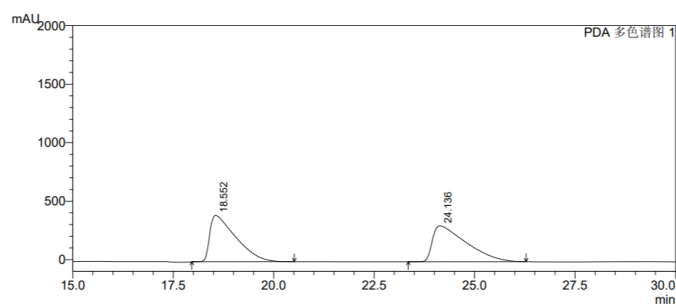

1 PDA 多色谱图 1/254nm 4nm

**Ch1 254nm 4nm**

| Peak# | Resolution Time | Area     | Height | Area %  | Height % |
|-------|-----------------|----------|--------|---------|----------|
| 1     | 18.552          | 17686396 | 394250 | 49.724  | 56.212   |
| 2     | 24.136          | 17882682 | 307116 | 50.276  | 43.788   |
| 总计    |                 | 35569079 | 701366 | 100.000 | 100.000  |

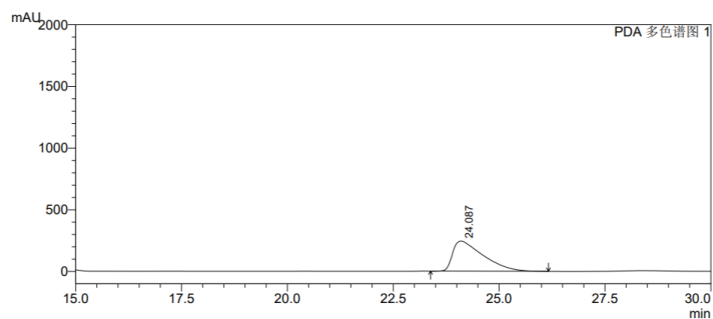

1 PDA 多色谱图 1/254nm 4nm

**Ch1 254nm 4nm**

| Peak# | Resolution Time | Area     | Height | Area %  | Height % |
|-------|-----------------|----------|--------|---------|----------|
| 1     | 24.087          | 12138147 | 243023 | 100.000 | 100.000  |
| 总计    |                 | 12138147 | 243023 | 100.000 | 100.000  |

## II. Synthesis of (*R*)-PyOx-5d

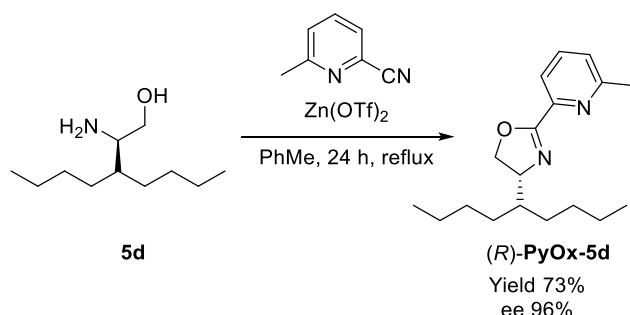

### Scheme S6 Preparation of (*R*)-PyOx-5d.

The synthesis of (*R*)-PyOx-5d was adapted from procedures described by Huang.<sup>11</sup> The prepared amino alcohol **5d** (0.5 g, 2.6 mmol, 1.0 equiv.) was added to a mixture of 6-methylpyridine nitrile (189 mg, 1.6 mmol, 0.6 equiv.) and Zn(OTf)<sub>2</sub> (57 mg, 0.15 mmol, 0.06 equiv.) in toluene 20 mL. The solution was refluxed and stirred for 24 hours, and then concentrated in vacuo. The crude product was purified by column chromatography with PE/EtOAc (2/1, 1% Et<sub>3</sub>N added) as the eluent, the target compound (*R*)-PyOx-5d was obtained as a white solid at 0 °C (562 mg, yield 73%, 96% ee).

### (*R*)-2-(6-Methylpyridin-2-yl)-4-(nonan-5-yl)-4,5-dihydrooxazole ((*R*)-PyOx-5d).

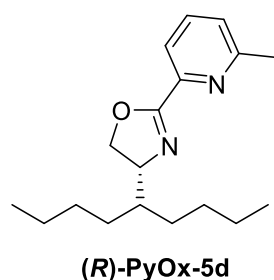

**(R)-PyOx-5d**

**<sup>1</sup>H NMR (600 MHz, Chloroform-*d*)** δ 7.85 (d, *J* = 7.9 Hz, 1H), 7.68 – 7.50 (m, 1H), 7.22 – 7.12 (m, 1H), 4.53 – 4.41 (m, 1H), 4.42 – 4.34 (m, 1H), 4.28 – 4.12 (m, 1H), 2.59 (d, *J* = 3.1 Hz, 3H), 1.72 – 1.56 (m, 1H), 1.46 – 1.08 (m, 12H), 0.93 – 0.76 (m, 6H).

**<sup>13</sup>C NMR (151 MHz, Chloroform-*d*)** δ 162.6, 158.7, 146.5, 136.7, 125.3, 121.2, 70.7, 69.7, 42.2, 30.2, 29.4, 29.3, 29.3, 24.7, 23.1, 23.1, 14.1.

**HRMS** (ESI) *m/z* calcd for C<sub>18</sub>H<sub>29</sub>N<sub>2</sub>O<sup>+</sup> [(M+H)<sup>+</sup>] 289.2274, found 289.2262.

[α]<sub>D</sub><sup>26</sup> = +4.5 (*c* = 1, CHCl<sub>3</sub>); 96% ee.

**HPLC analysis** CHIRALCEL OD-H column, 20% *i*PrOH in hexanes, 1.0 mL/min, 254 nm UV detector, *t*<sub>R</sub> (minor) = 5.9 min, *t*<sub>R</sub> (major) = 6.9 min.

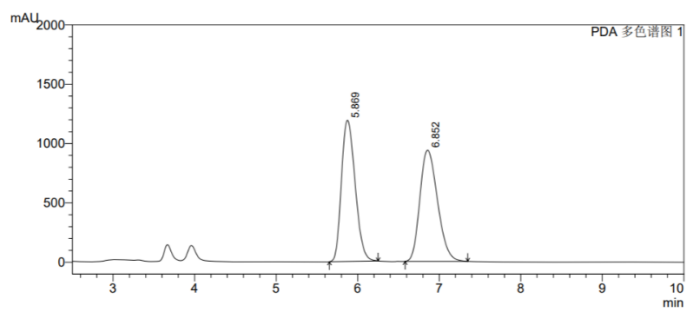

1 PDA 多色谱图 1/254nm 4nm

Ch1 254nm 4nm

| Peak# | Resolution Time | Area     | Height  | Area %  | Height % |
|-------|-----------------|----------|---------|---------|----------|
| 1     | 5.869           | 13876982 | 1189860 | 49.580  | 55.919   |
| 2     | 6.852           | 14111973 | 937978  | 50.420  | 44.081   |
| 总计    |                 | 27988955 | 2127838 | 100.000 | 100.000  |

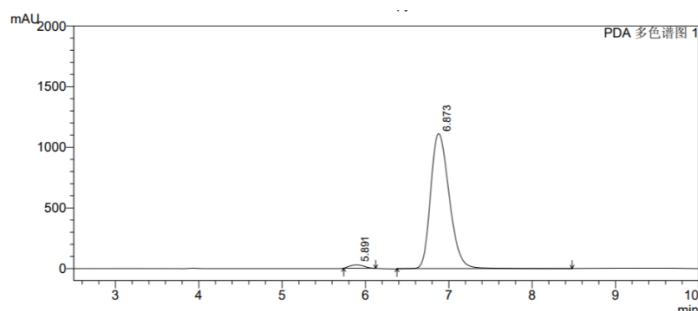

1 PDA 多色谱图 1/254nm 4nm

Ch1 254nm 4nm

| Peak# | Resolution Time | Area     | Height  | Area %  | Height % |
|-------|-----------------|----------|---------|---------|----------|
| 1     | 5.891           | 327097   | 27507   | 1.863   | 2.413    |
| 2     | 6.873           | 17232910 | 1112202 | 98.137  | 97.587   |
| 总计    |                 | 17560008 | 1139709 | 100.000 | 100.000  |

### III Synthesis of (*R,R*)-BiOx-5d

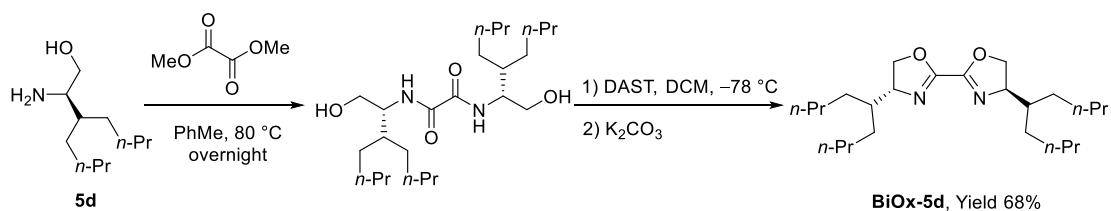

#### Scheme S7 Preparation of (*R,R*)-BiOx-5d.

Amino alcohol (100 mg, 0.53 mmol, 2.0 equiv.) and dimethyloxalate (31.6 mg, 0.27 mmol, 1.0 equiv.) were dissolved in PhMe (7 mL) and heated to 80 °C. After stir overnight, the reaction mixture was concentrated in vacuo to afford the crude diamide. To an oven-dried 50 mL round bottom flask crude diamide (109 mg, 0.25 mmol, 1.0 equiv.) was added under N<sub>2</sub> atmosphere, DCM (4 mL) was added and the flask was cooled to -78 °C, and diethylaminosulfur trifluoride (DAST, 114 mg, 0.71 mmol, 2.8

equiv.) was added dropwise. The reaction was stirred for 1 h, then  $\text{K}_2\text{CO}_3$  (138 mg, 1.0 mmol, 4.0 equiv.) was added and the flask was warmed to rt. After 45 min, the mixture was diluted with DCM (5 mL) and water (7 mL) was added. After transferring to a separatory funnel, the organic layer was washed with sat.  $\text{NaHCO}_3$  (aq.) (15 mL), and brine (15 mL), and dried over  $\text{MgSO}_4$ . The dried organic layer was concentrated under reduced pressure and the crude product was purified by flash chromatography on silica gel to afford ligand **BiOx-5d** as a colorless solid (yield 68%, 66.6 mg).

**(4*R*,4'*R*)-4,4'-Di(nonan-5-yl)-4,4',5,5'-tetrahydro-2,2'-bioxazole (BiOx-5d)**

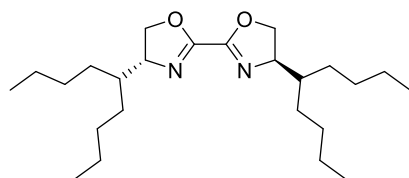

(*R,R*)-**BiOx-5d**

**$^1\text{H}$  NMR (600 MHz, Chloroform-*d*)**  $\delta$  4.73 – 4.29 (m, 4H), 4.14 (t,  $J = 7.9$  Hz, 2H), 1.66 – 1.56 (m, 2H), 1.44 – 1.12 (m, 24H), 0.93 – 0.74 (m, 12H).

**$^{13}\text{C}$  NMR (151 MHz, Chloroform-*d*)**  $\delta$  154.5, 71.0, 69.9, 41.9, 29.8, 29.3, 29.2, 29.2, 23.1, 23.0, 14.1, 14.1.

#### IV Application of **BiOx-5d**

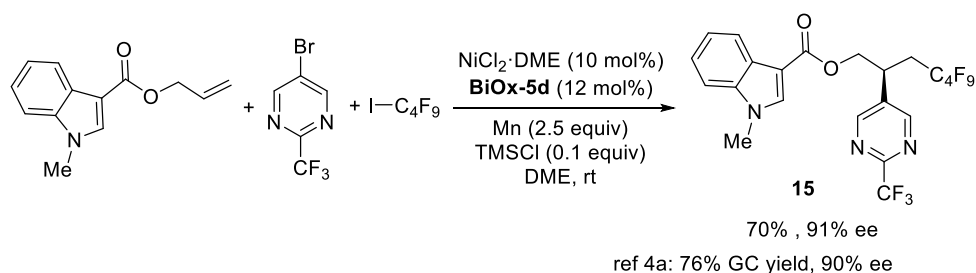

**Scheme S8** Application of **BiOx-5d**.

To a flame-dried 10 mL reaction vial was charged with  $\text{NiCl}_2 \cdot \text{glyme}$  (2.2 mg, 0.01 mmol, 10 mol%), **BiOx-5d** (4.7 mg, 0.012 mmol, 12 mol%) [Note: 4,4'-di-*tert*-butyl-2,2'-bipyridine (dtbbpy) for the corresponding racemic reactions], Mn (13.8 mg, 0.25 mmol, 2.5 equiv.), alkene (43 mg, 0.2 mmol, 2.0 equiv.), and aryl halide (22.6 mg, 0.1

mmol, 1.0 equiv.). After evacuated and backfilled nitrogen three times, DME 0.2 mL was added via a syringe. The reaction mixture was allowed to stir for approximately 30 minutes before fluoroalkyl iodide (69.2 mg, 0.2 mmol, 2.0 equiv.) and TMSCl (1.1 mg, 0.01 mmol, 0.1 equiv.) were added. The reaction mixture was stirred at  $-10\text{ }^{\circ}\text{C}$  for 24 h. The reaction was quenched with saturated ammonium chloride solution, extracted with ethyl acetate three times. The combined organic layers were dried over  $\text{MgSO}_4$ , filtered, and concentrated in vacuo. The crude material was purified by flash chromatography (petroleum ether : ethyl acetate = 5:1). The product as a white solid (40.7 mg, 70%, 91% ee).

**(S)-4,4,5,5,6,6,7,7,7-nonafluoro-2-(2-(trifluoromethyl)pyrimidin-5-yl)heptyl 1-methyl-1H-indole-3-carboxylate (15)**

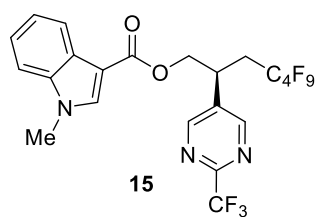

**$^1\text{H NMR}$  (600 MHz, Chloroform-*d*)**  $\delta$  8.91 (s, 2H), 7.95 (d,  $J = 7.9$  Hz, 1H), 7.70 (s, 1H), 7.39 – 7.35 (m, 1H), 7.35 – 7.29 (m, 1H), 7.29 – 7.27 (m, 1H), 4.78 – 4.36 (m, 2H), 3.85 (s, 3H), 3.80 – 3.73 (m, 1H), 2.87 – 2.76 (m, 1H), 2.73 – 2.60 (m, 1H).

**$^{13}\text{C NMR}$  (151 MHz, Chloroform-*d*)**  $\delta$  163.9, 157.5, 156.4, 137.4, 136.2, 135.6, 126.5, 123.4, 121.3, 119.4, 110.2, 105.6, 65.2, 34.4, 33.7, 32.9.

**$^{19}\text{F NMR}$  (565 MHz, Chloroform-*d*)**  $\delta$  -70.24, -80.96 (d,  $J = 10.1$  Hz), -108.62 – -112.35 (m), -112.20 – -114.22 (m), -121.55 – -127.52 (m).

**HPLC analysis** CHIRALCEL IC-H column, 15% *i*PrOH in hexanes, 1.0 mL/min, 254 nm UV detector,  $t_{\text{R}}$  (minor) = 11.9 min,  $t_{\text{R}}$  (major) = 13.8 min.

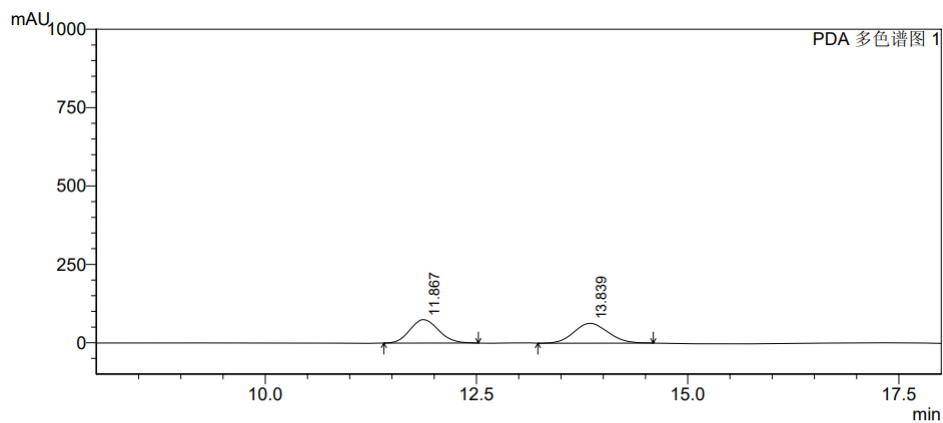

1 PDA 多色谱图 1/254nm 4nm

**Ch1 254nm 4nm**

| Peak# | Resolution Time | Area    | Height | Area %  | Height % |
|-------|-----------------|---------|--------|---------|----------|
| 1     | 11.867          | 1767171 | 74989  | 49.874  | 54.204   |
| 2     | 13.839          | 1776122 | 63357  | 50.126  | 45.796   |
| 总计    |                 | 3543293 | 138346 | 100.000 | 100.000  |

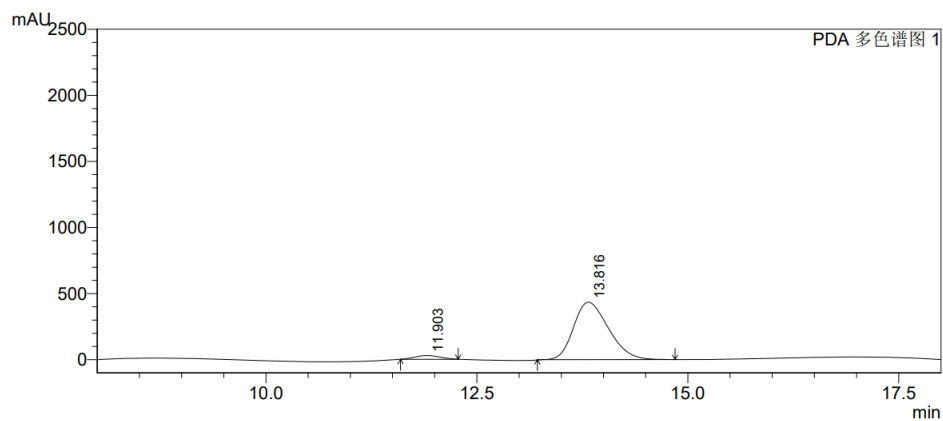

1 PDA 多色谱图 1/254nm 4nm

**Ch1 254nm 4nm**

| Peak# | Resolution Time | Area     | Height | Area %  | Height % |
|-------|-----------------|----------|--------|---------|----------|
| 1     | 11.903          | 593173   | 28396  | 4.524   | 6.133    |
| 2     | 13.816          | 12518913 | 434598 | 95.476  | 93.867   |
| 总计    |                 | 13112086 | 462993 | 100.000 | 100.000  |

# Spectroscopic Data (NMR Spectra)

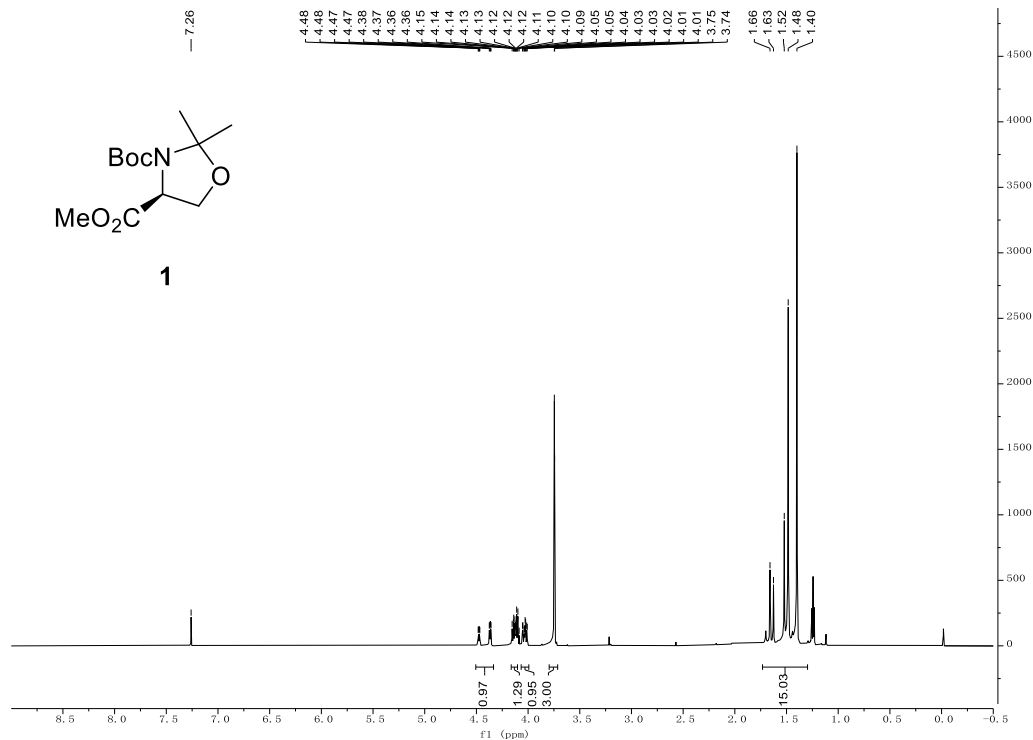

<sup>1</sup>H NMR (600 MHz, CDCl<sub>3</sub>) spectrum for **1**

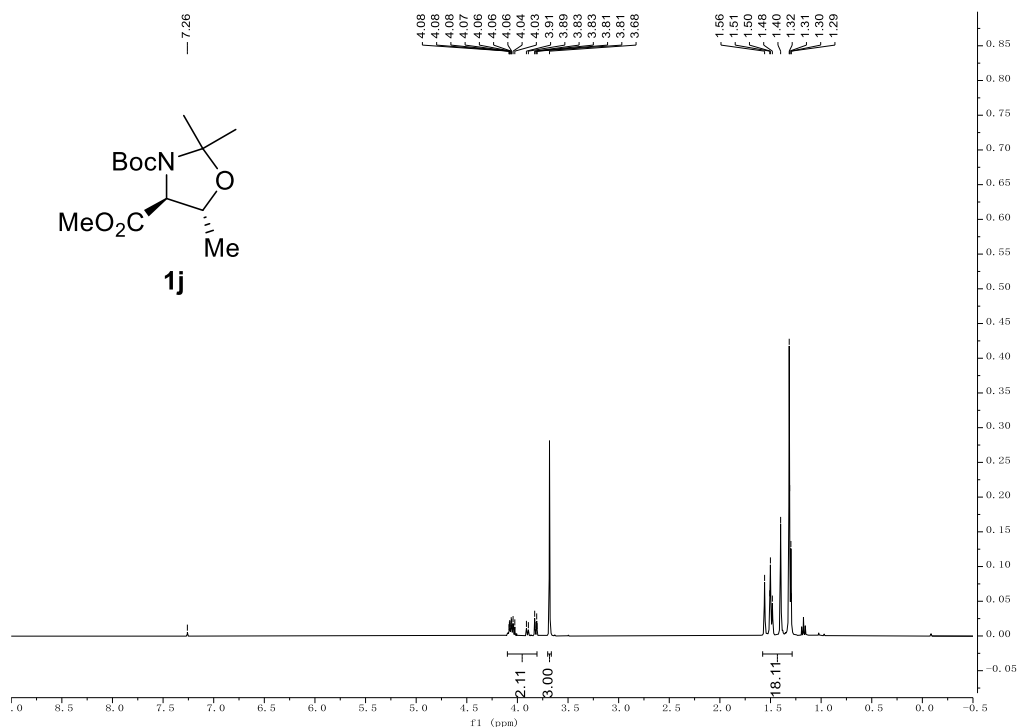

<sup>1</sup>H NMR (600 MHz, CDCl<sub>3</sub>) spectrum for **1j**

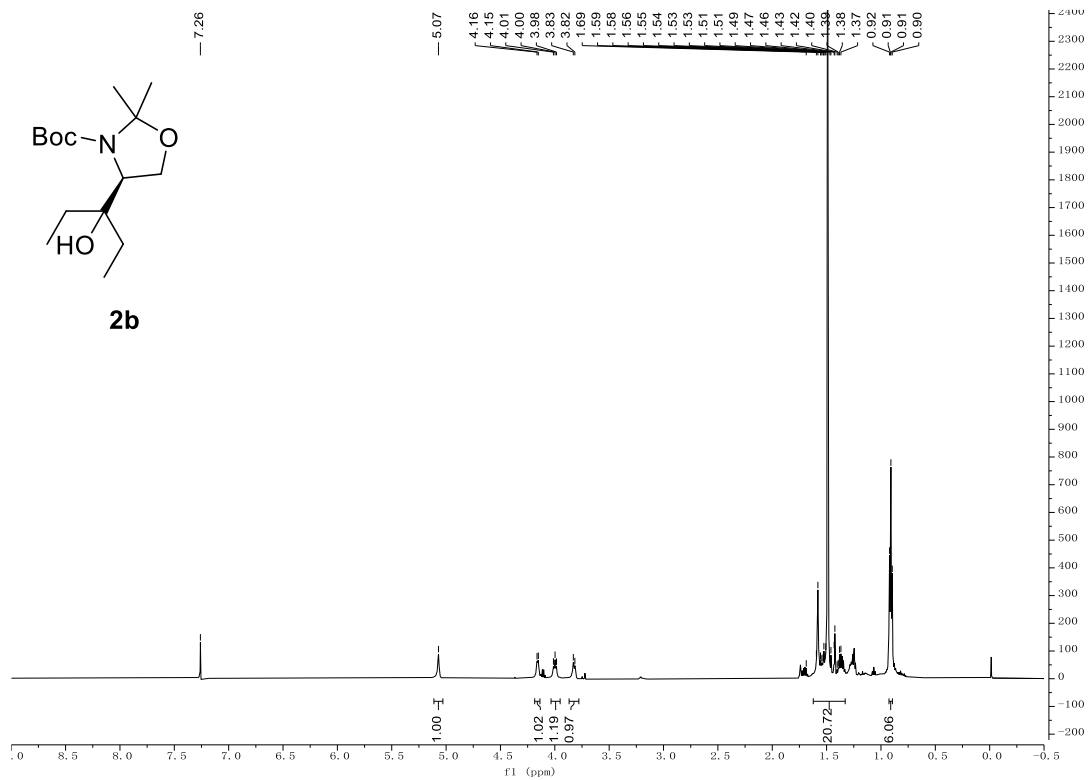

$^1\text{H}$  NMR (600 MHz,  $\text{CDCl}_3$ ) spectrum for **2b**

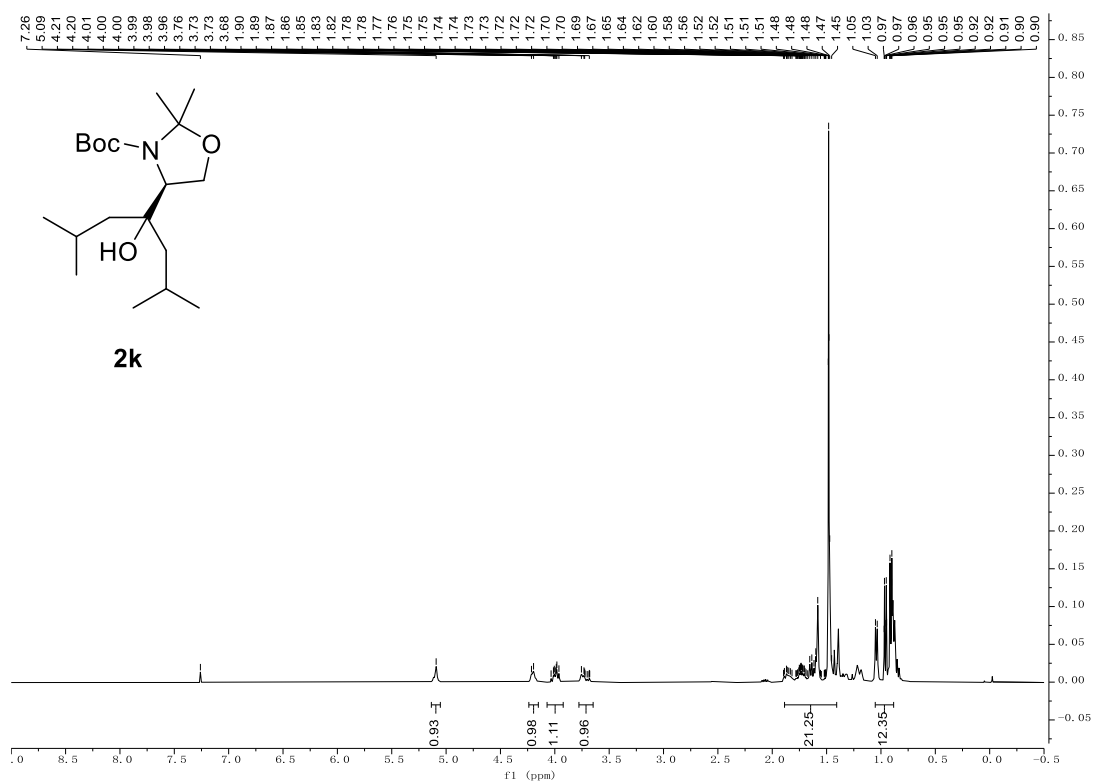

$^1\text{H}$  NMR (600 MHz,  $\text{CDCl}_3$ ) spectrum for **2k**



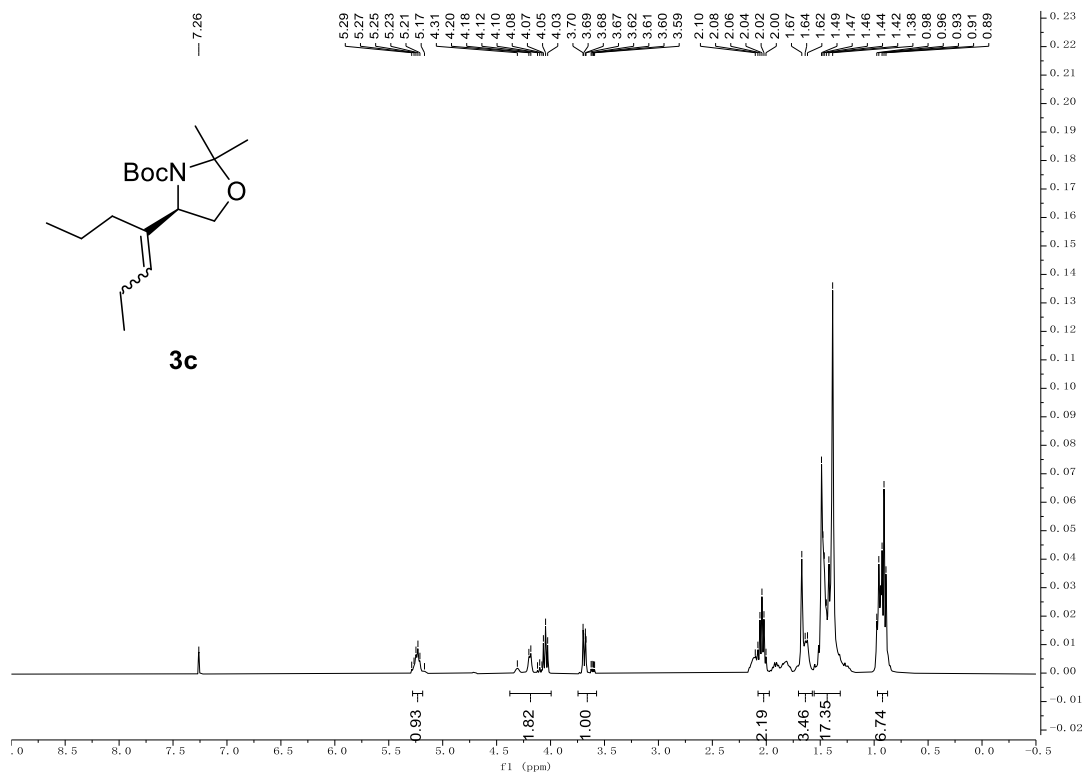

$^1\text{H}$  NMR (400 MHz,  $\text{CDCl}_3$ ) spectrum for **3c**

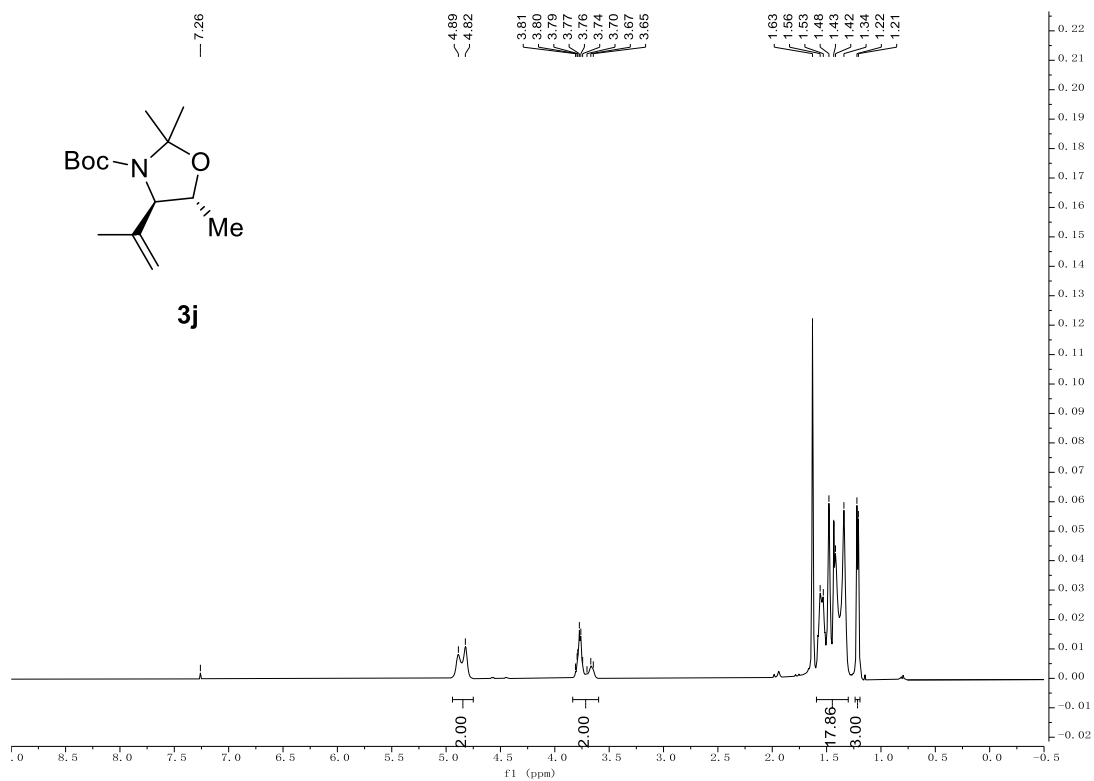

$^1\text{H}$  NMR (400 MHz,  $\text{CDCl}_3$ ) spectrum for **3j**

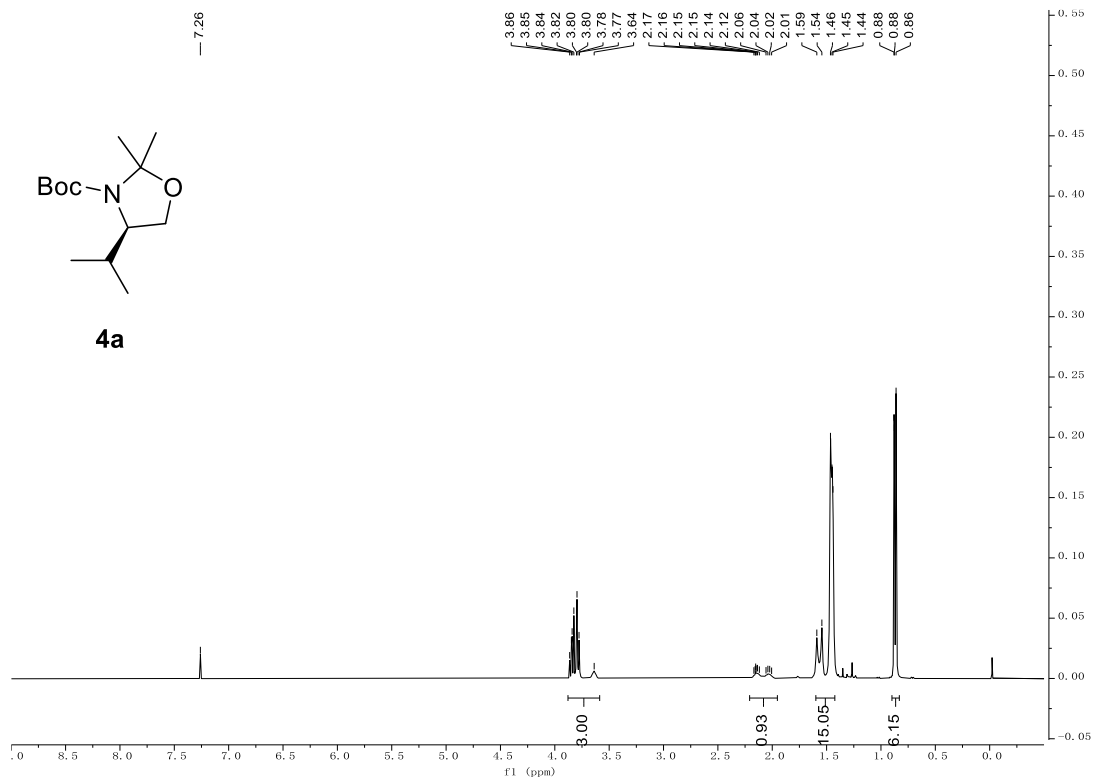

$^1\text{H}$  NMR (400 MHz,  $\text{CDCl}_3$ ) spectrum for **4a**

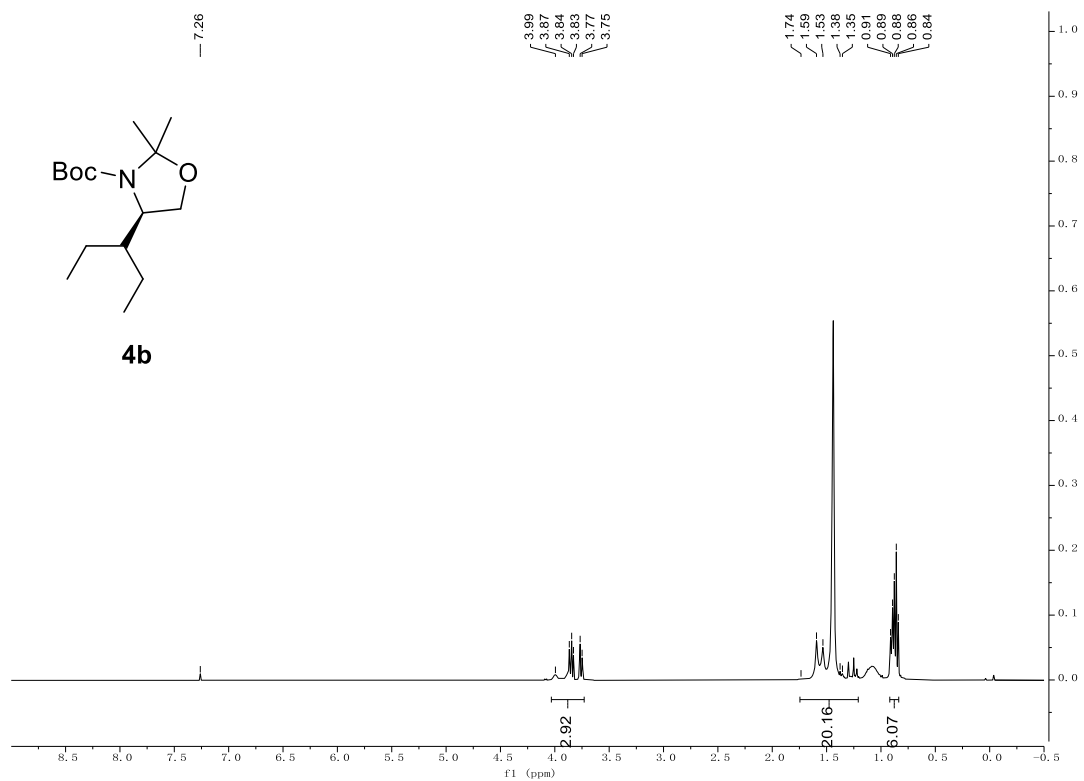

$^1\text{H}$  NMR (400 MHz,  $\text{CDCl}_3$ ) spectrum for **4b**

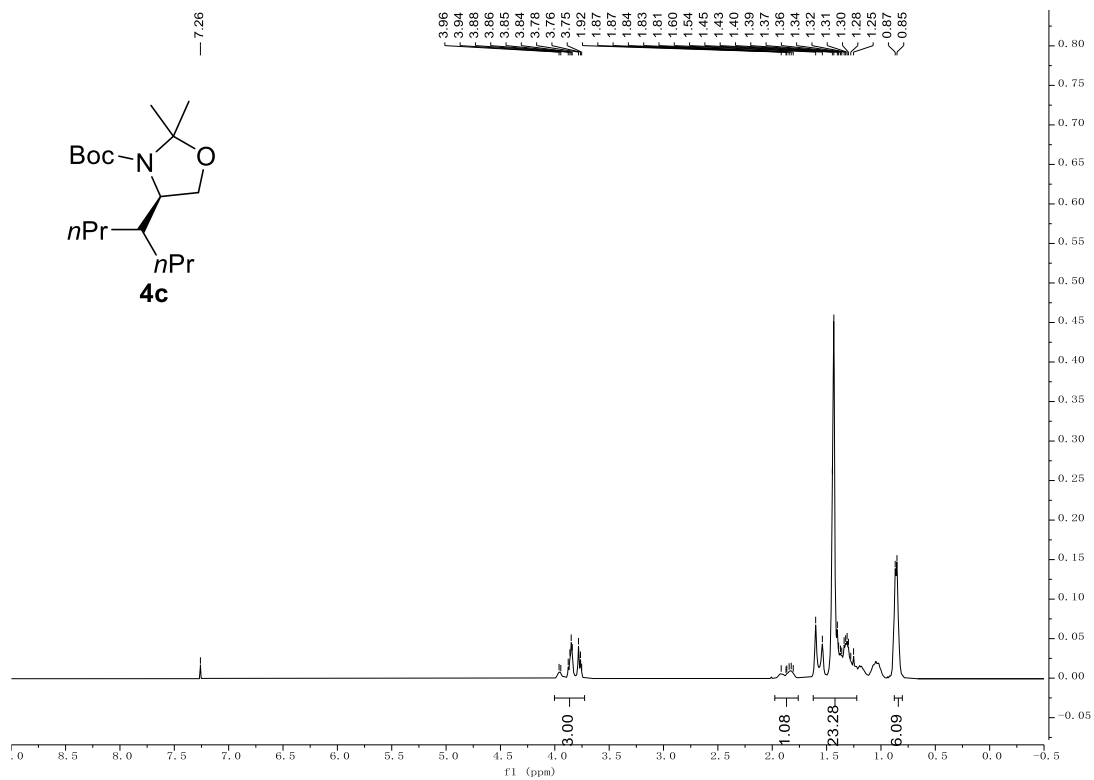

<sup>1</sup>H NMR (400 MHz, CDCl<sub>3</sub>) spectrum for **4c**

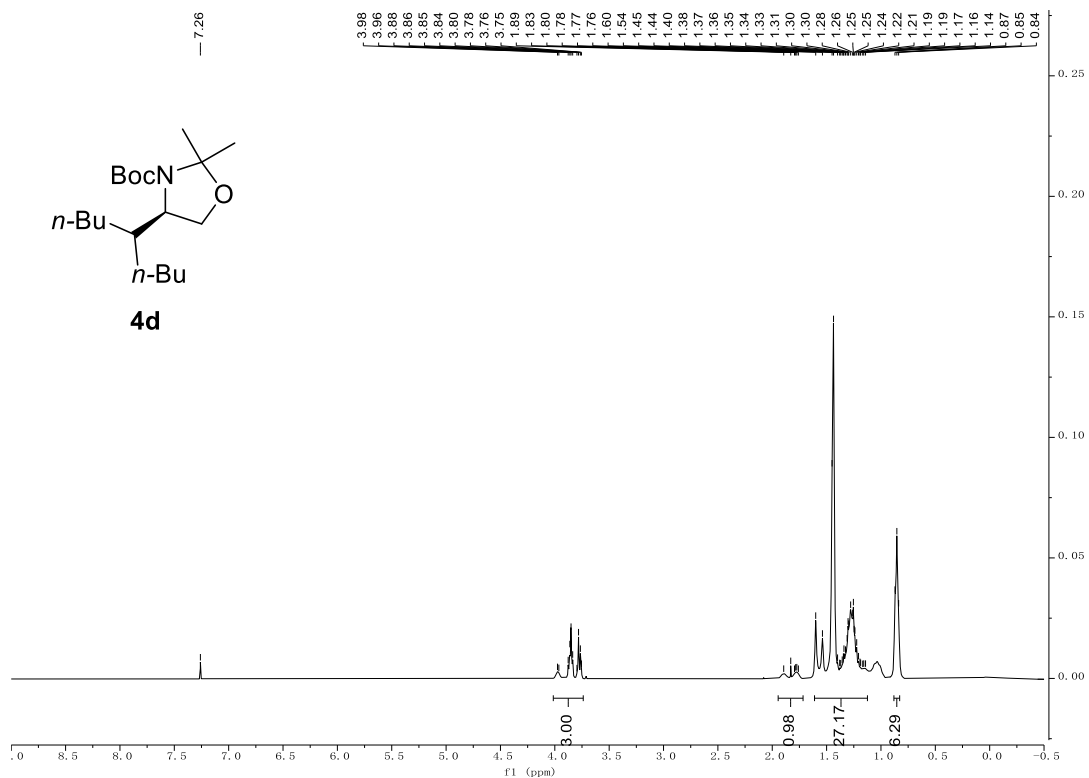

<sup>1</sup>H NMR (400 MHz, CDCl<sub>3</sub>) spectrum for **4d**

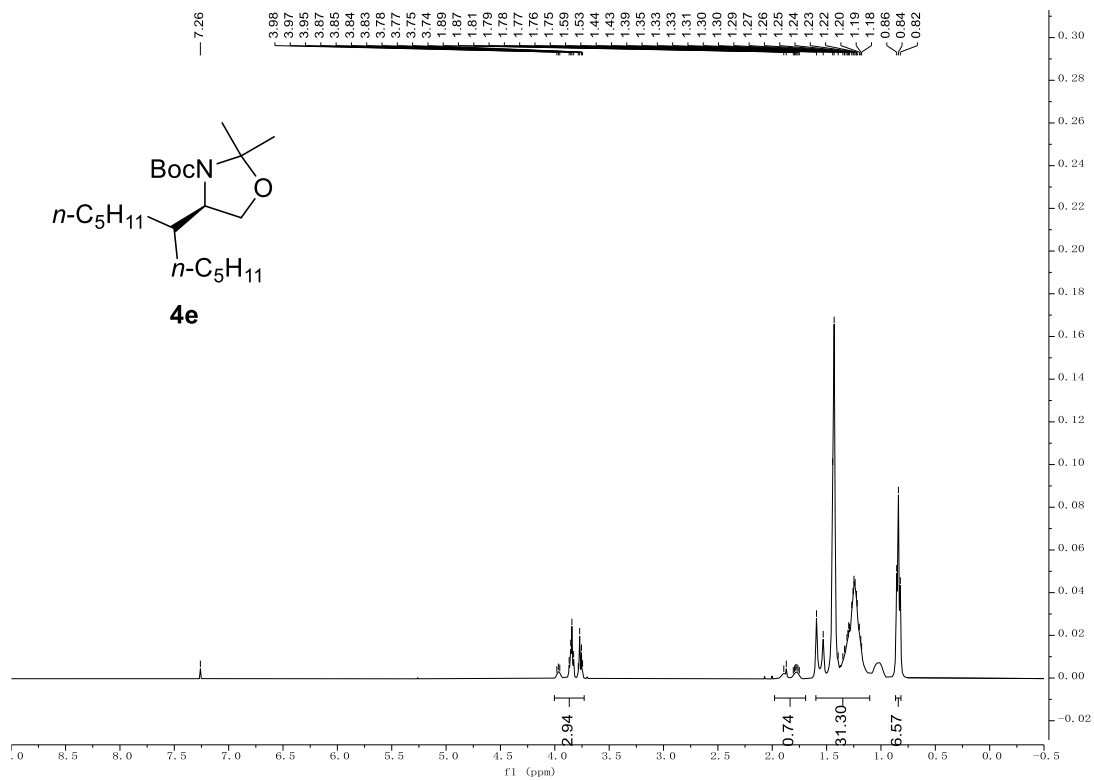

<sup>1</sup>H NMR (400 MHz, CDCl<sub>3</sub>) spectrum for **4e**

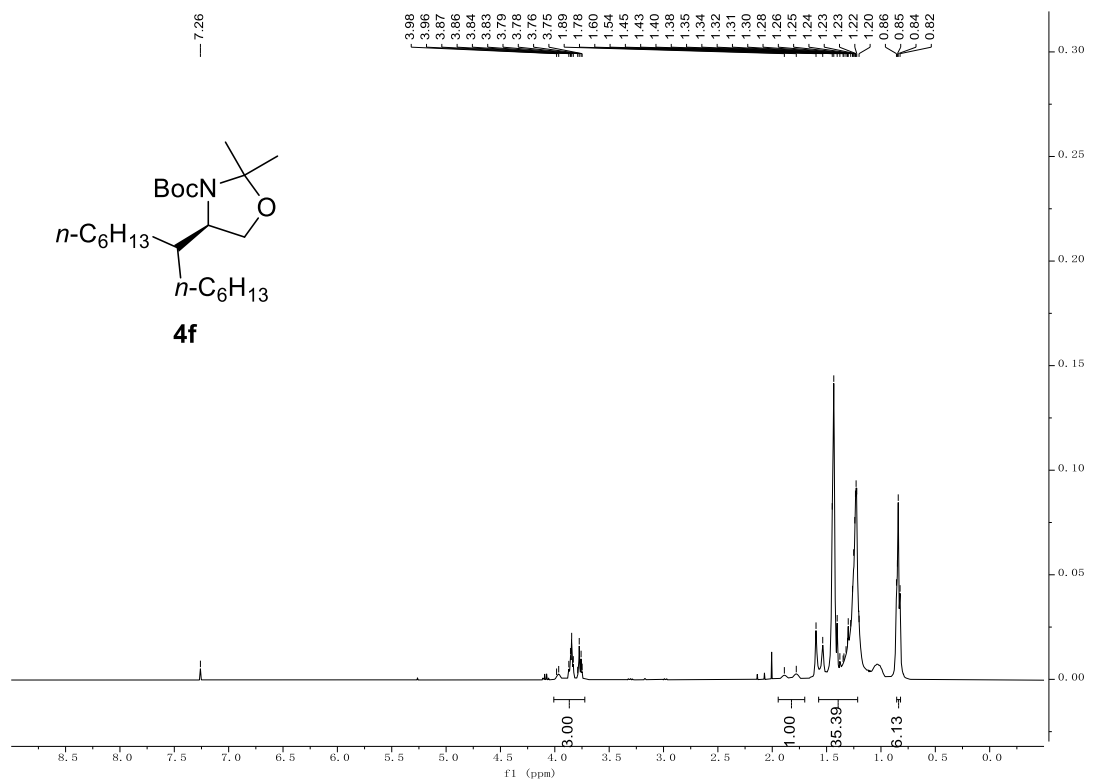

<sup>1</sup>H NMR (400 MHz, CDCl<sub>3</sub>) spectrum for **4f**

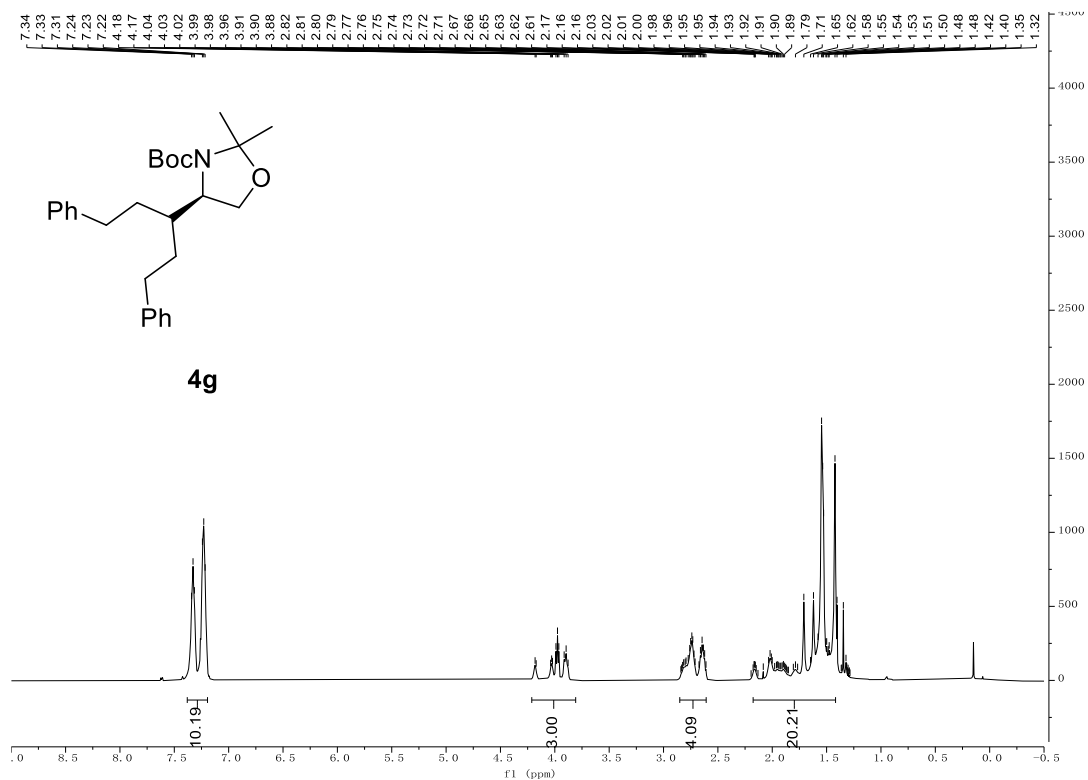

<sup>1</sup>H NMR (400 MHz, CDCl<sub>3</sub>) spectrum for **4g**

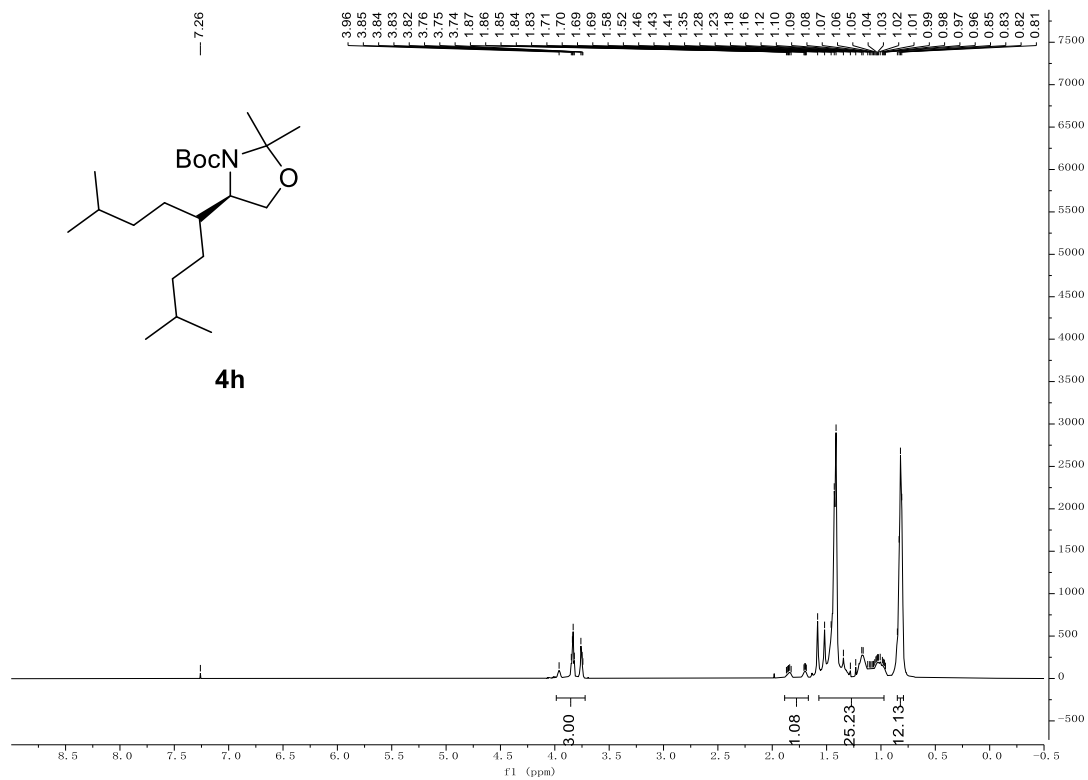

<sup>1</sup>H NMR (400 MHz, CDCl<sub>3</sub>) spectrum for **4h**

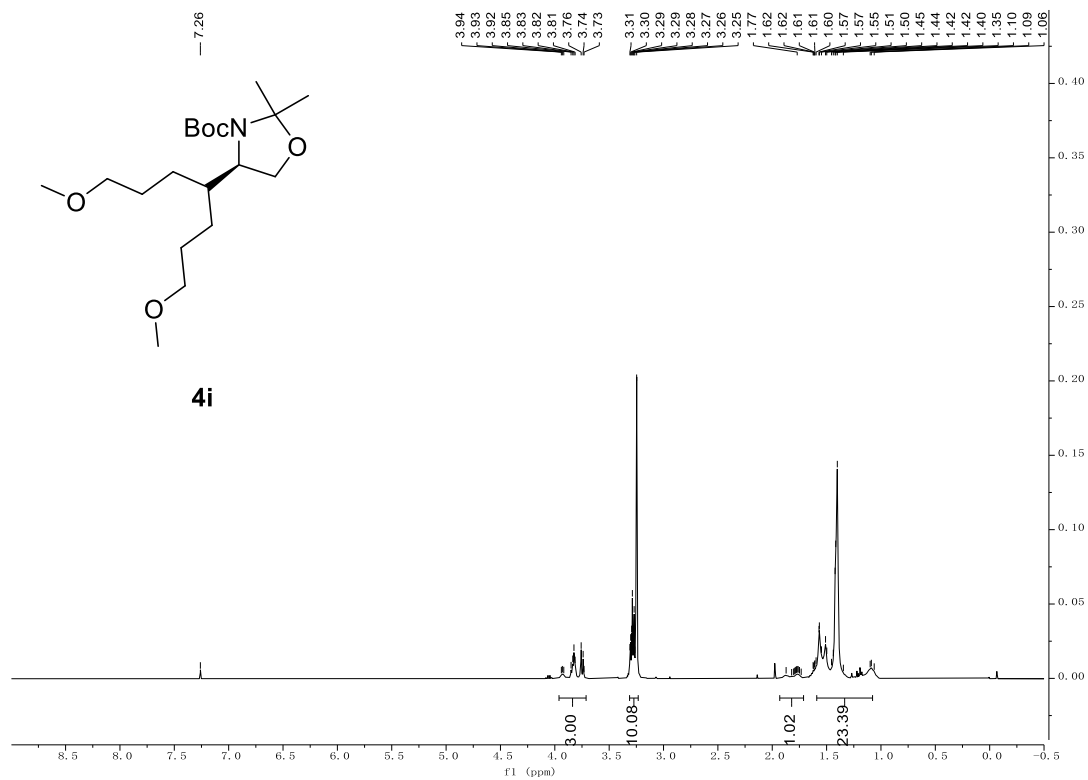

$^1\text{H}$  NMR (400 MHz,  $\text{CDCl}_3$ ) spectrum for **4i**

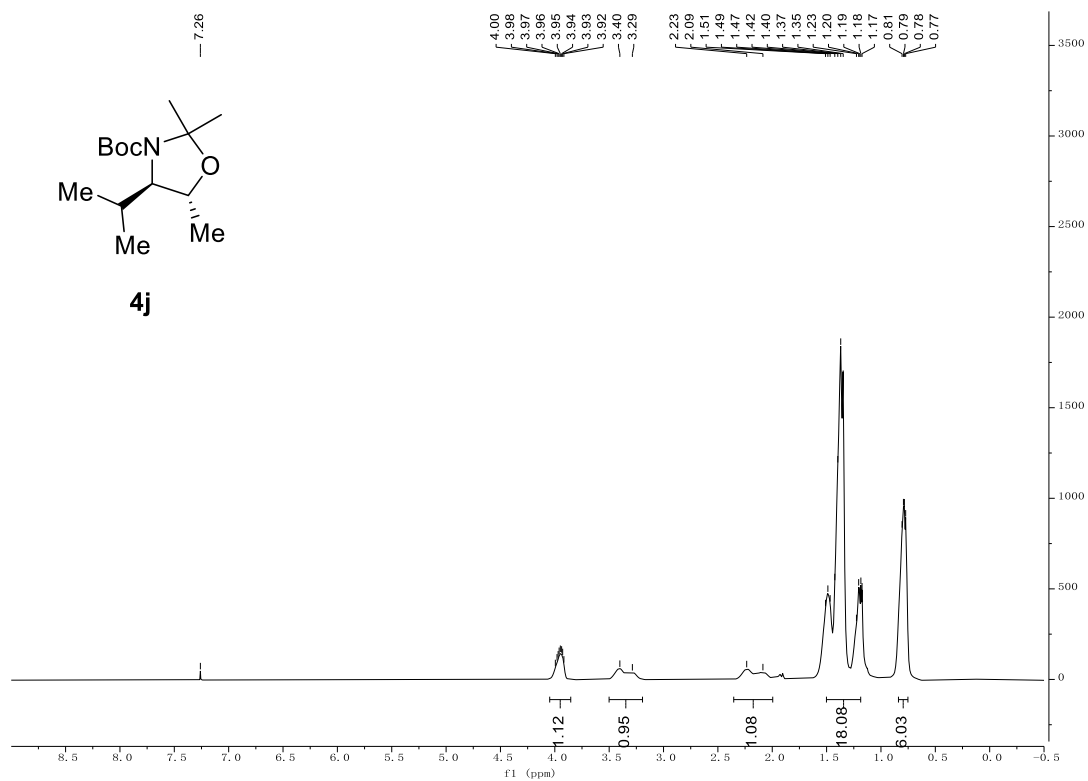

$^1\text{H}$  NMR (400 MHz,  $\text{CDCl}_3$ ) spectrum for **4j**

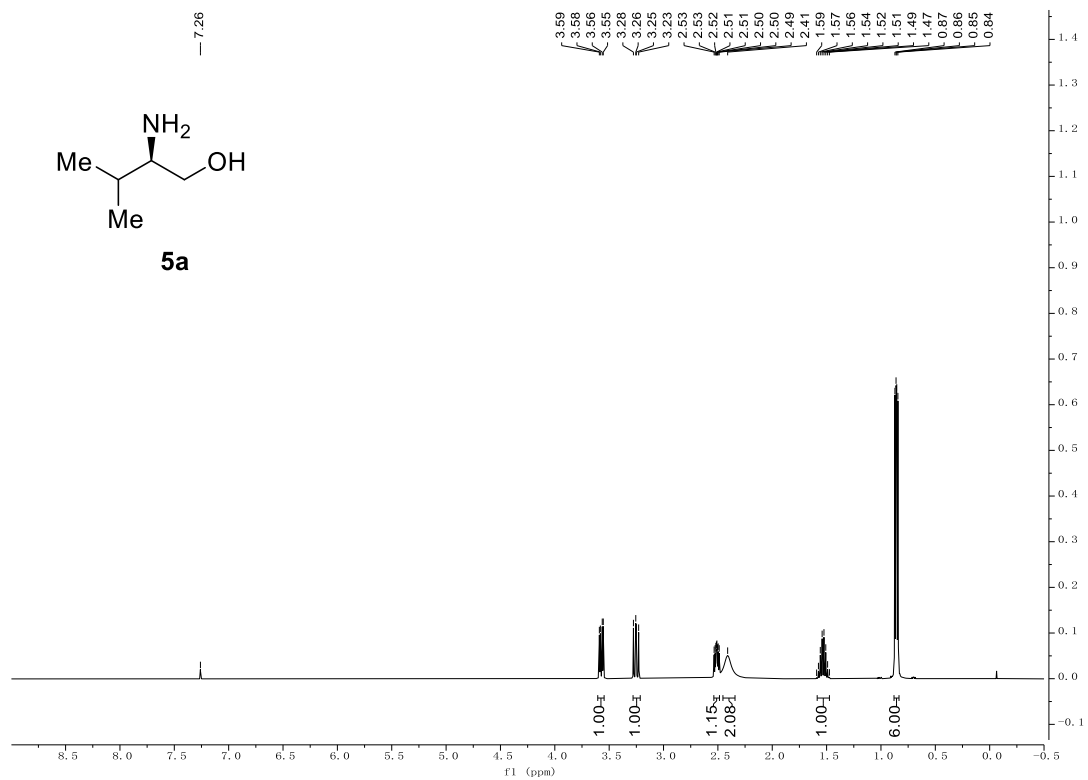

$^1\text{H}$  NMR (400 MHz,  $\text{CDCl}_3$ ) spectrum for **5a**

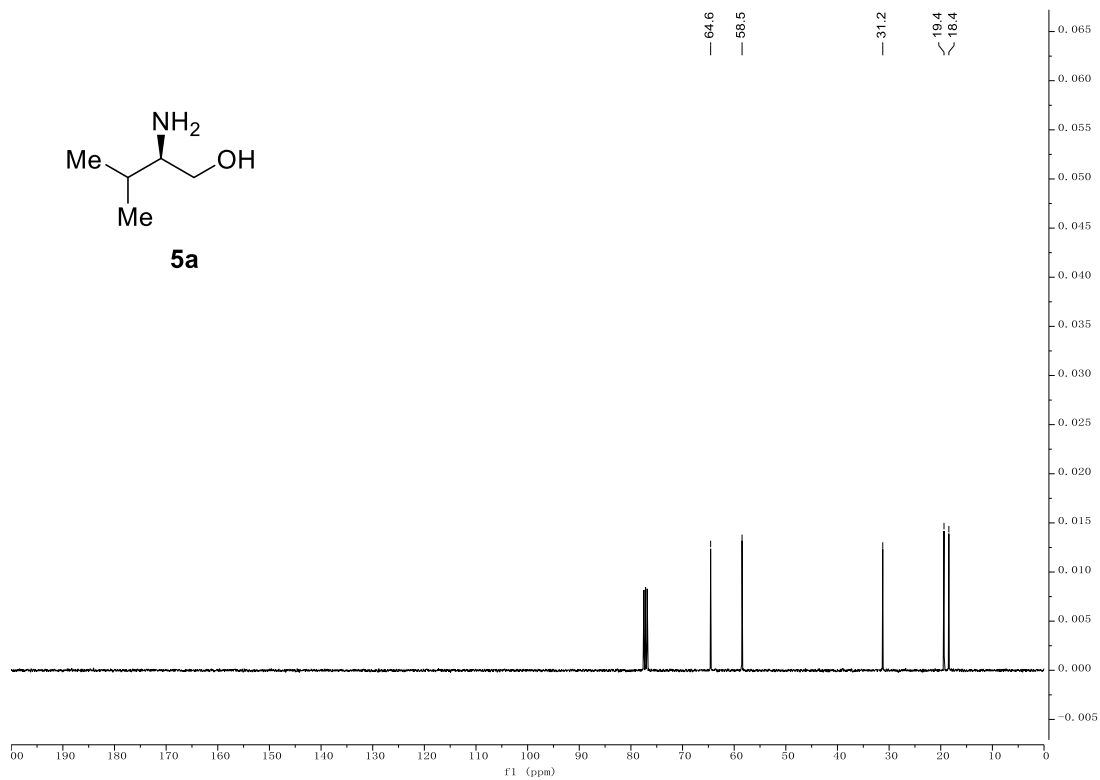

$^{13}\text{C}$  NMR (101 MHz,  $\text{CDCl}_3$ ) spectrum for **5a**

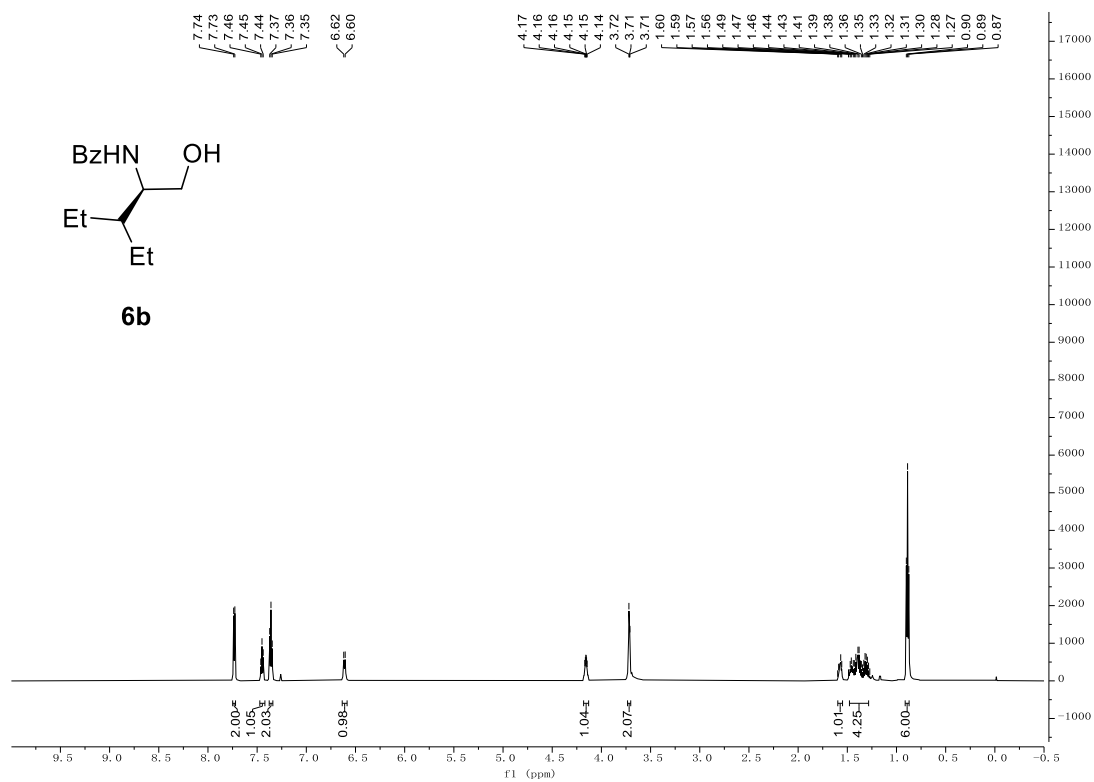

$^1\text{H}$  NMR (600 MHz,  $\text{CDCl}_3$ ) spectrum for **6b**

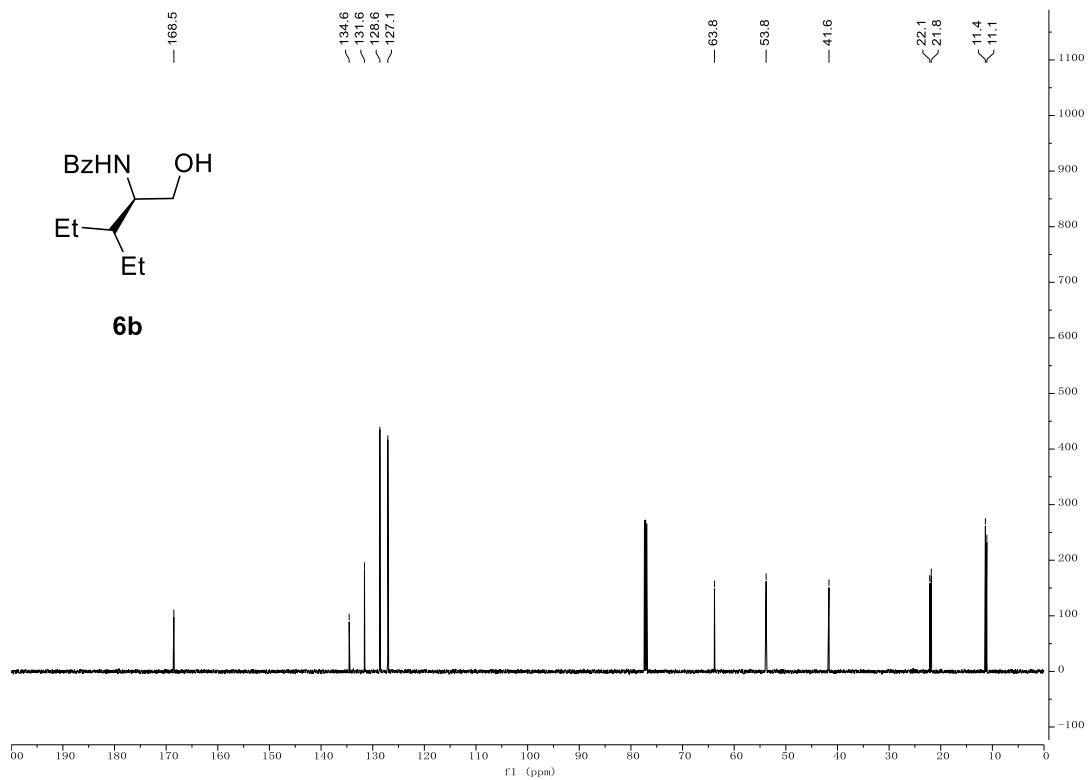

$^{13}\text{C}$  NMR (151 MHz,  $\text{CDCl}_3$ ) spectrum for **6b**



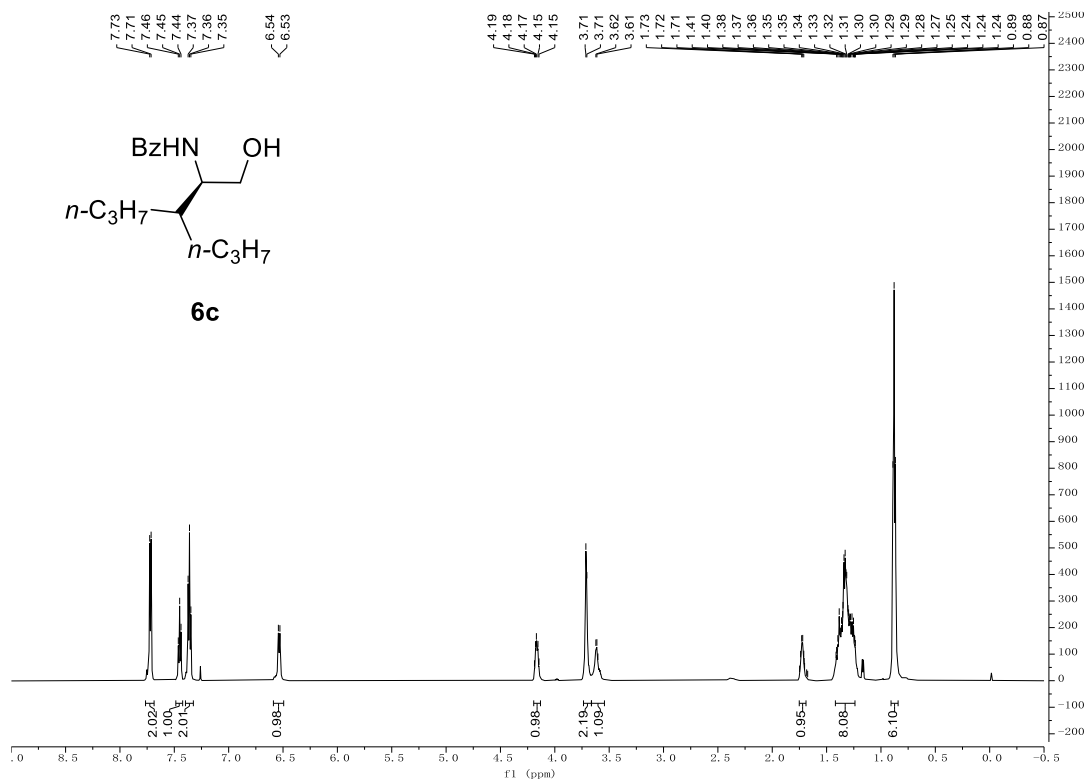

<sup>1</sup>H NMR (600 MHz, CDCl<sub>3</sub>) spectrum for **6c**

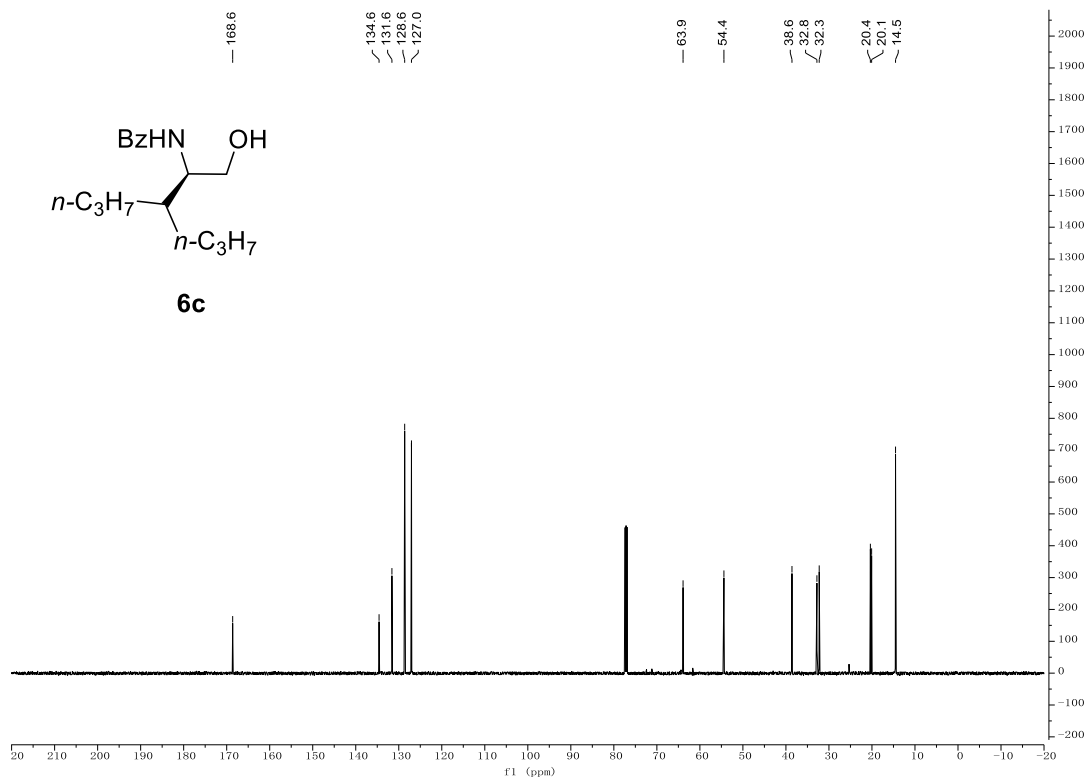

<sup>13</sup>C NMR (151 MHz, CDCl<sub>3</sub>) spectrum for **6c**

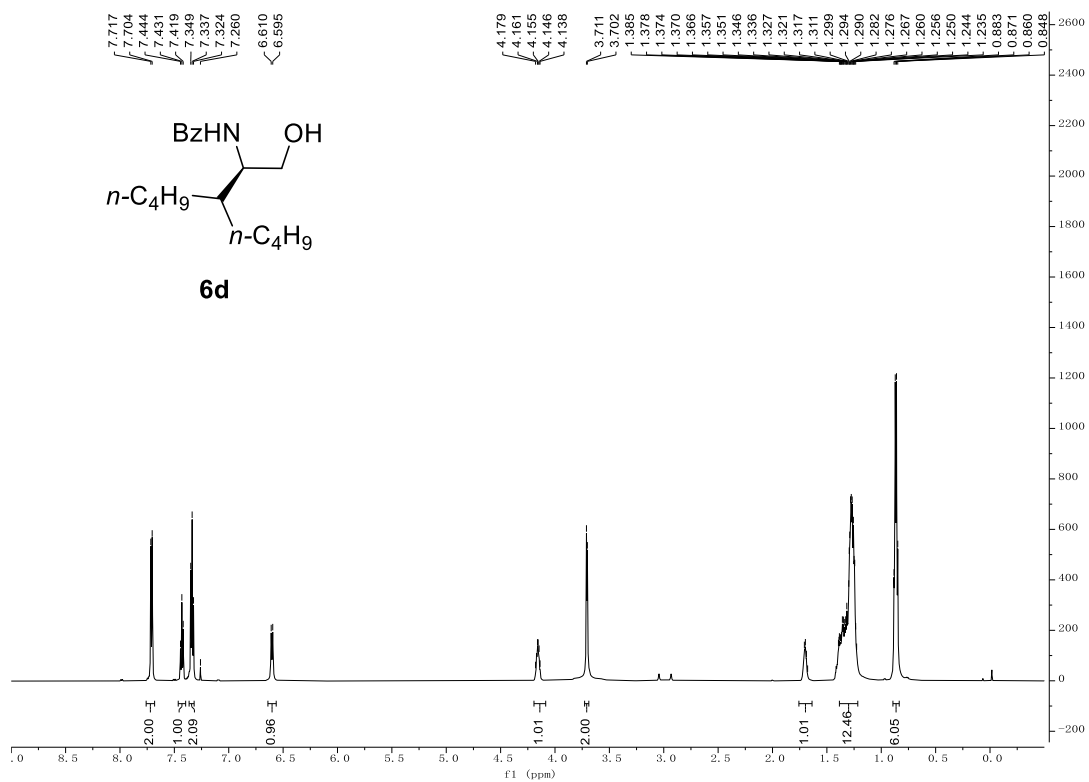

$^1\text{H}$  NMR (600 MHz,  $\text{CDCl}_3$ ) spectrum for **6d**

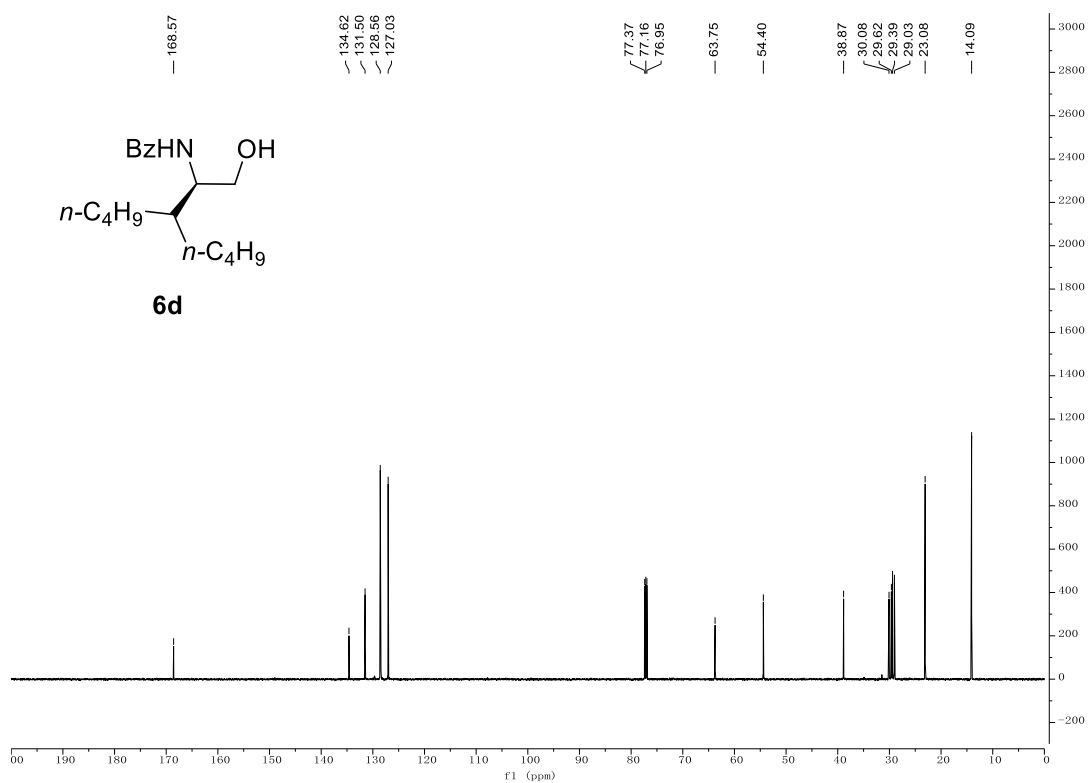

$^{13}\text{C}$  NMR (151 MHz,  $\text{CDCl}_3$ ) spectrum for **6d**

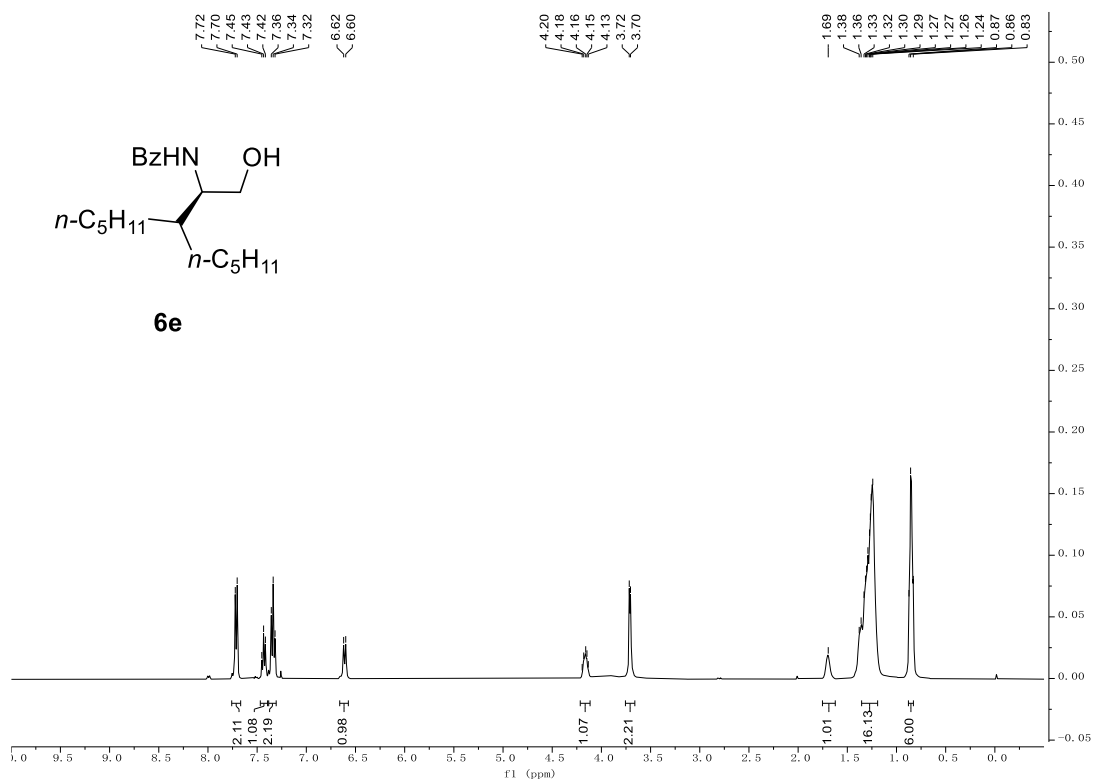

$^1\text{H}$  NMR (600 MHz,  $\text{CDCl}_3$ ) spectrum for **6e**

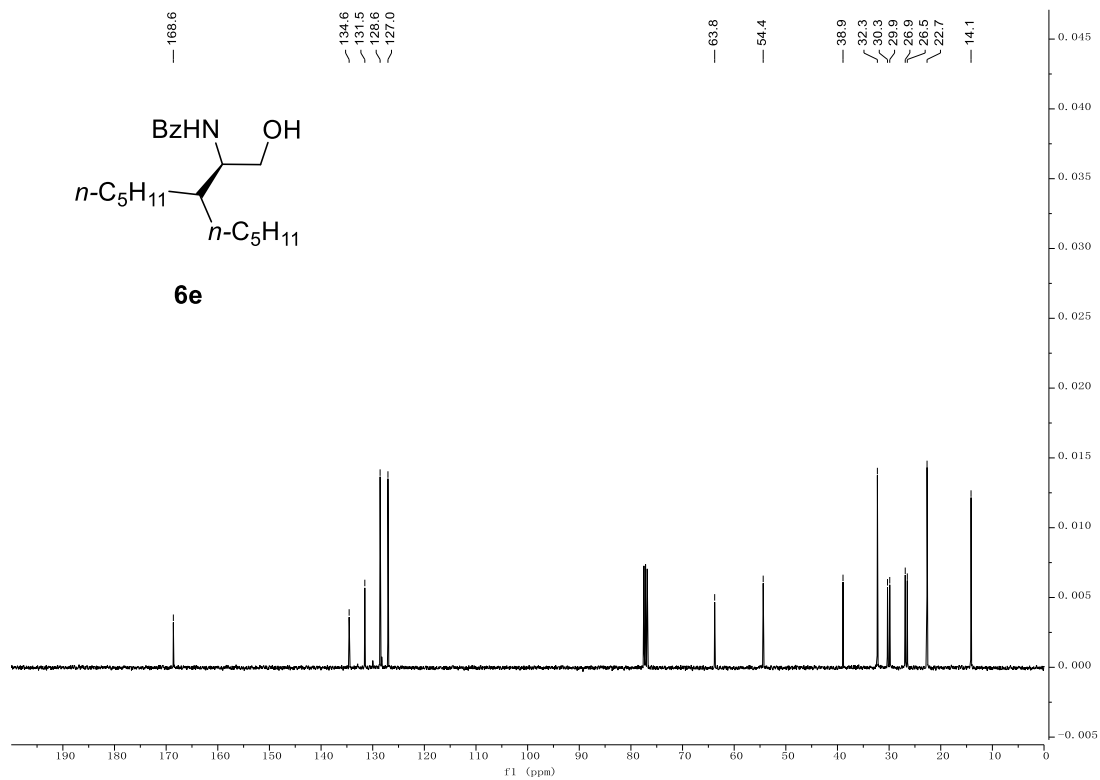

$^{13}\text{C}$  NMR (151 MHz,  $\text{CDCl}_3$ ) spectrum for **6e**

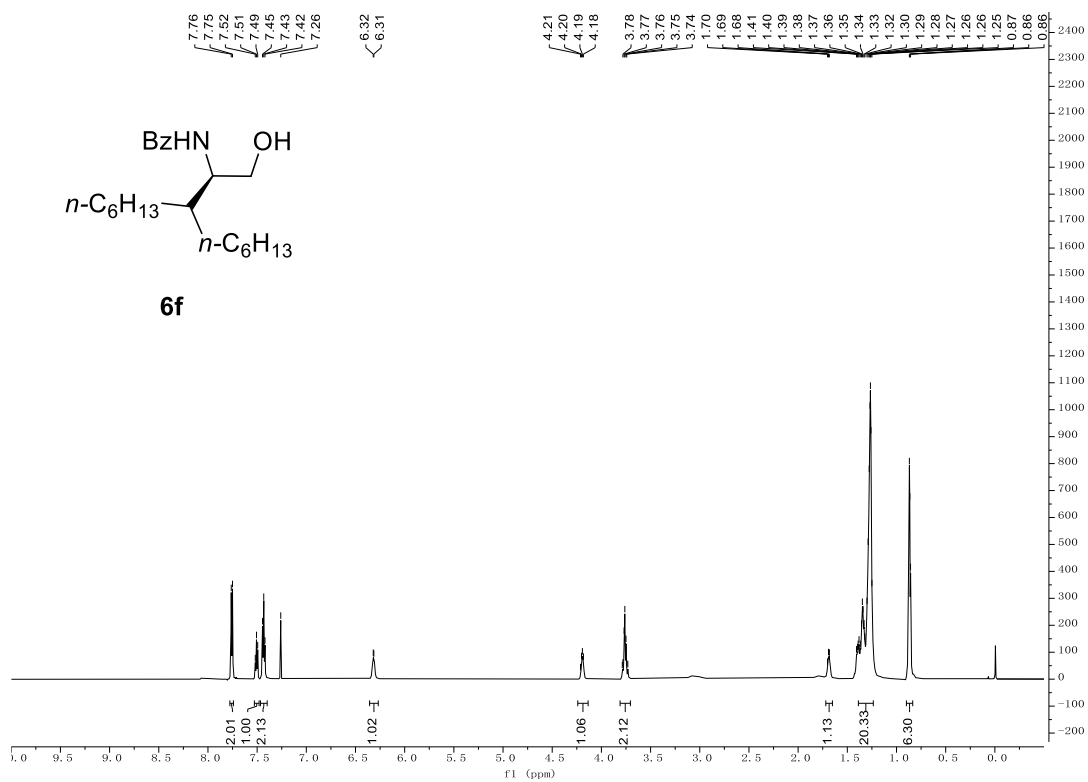

$^1\text{H}$  NMR (600 MHz,  $\text{CDCl}_3$ ) spectrum for **6f**

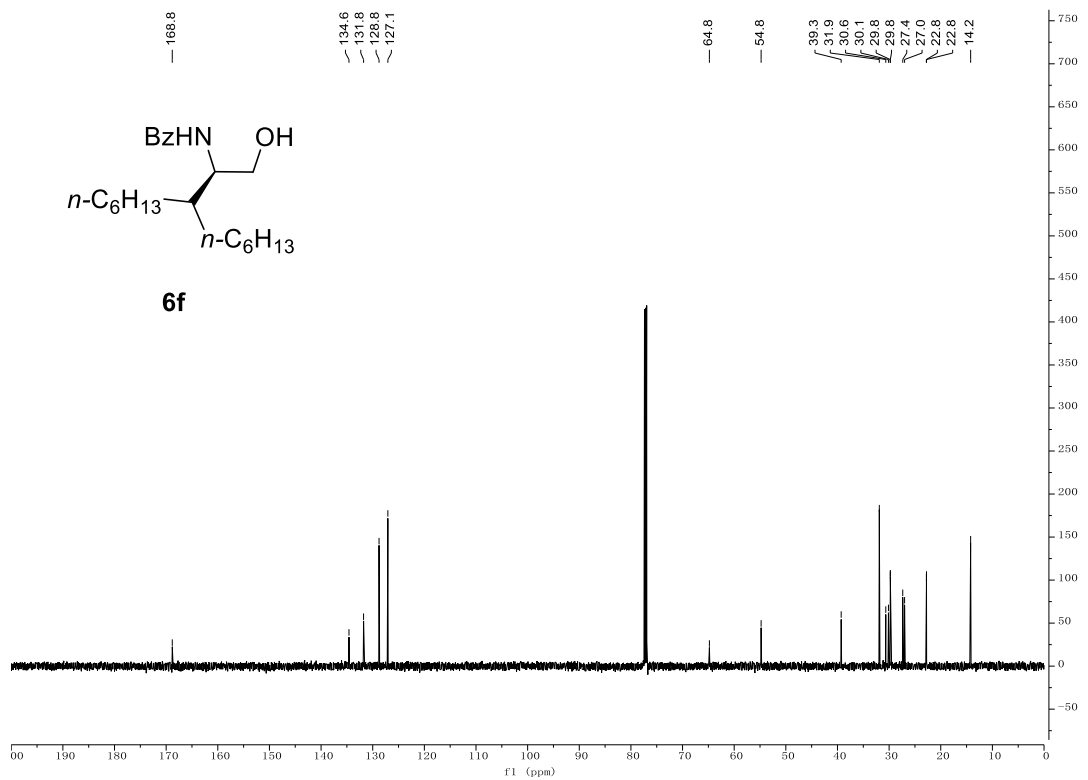

$^{13}\text{C}$  NMR (151 MHz,  $\text{CDCl}_3$ ) spectrum for **6f**

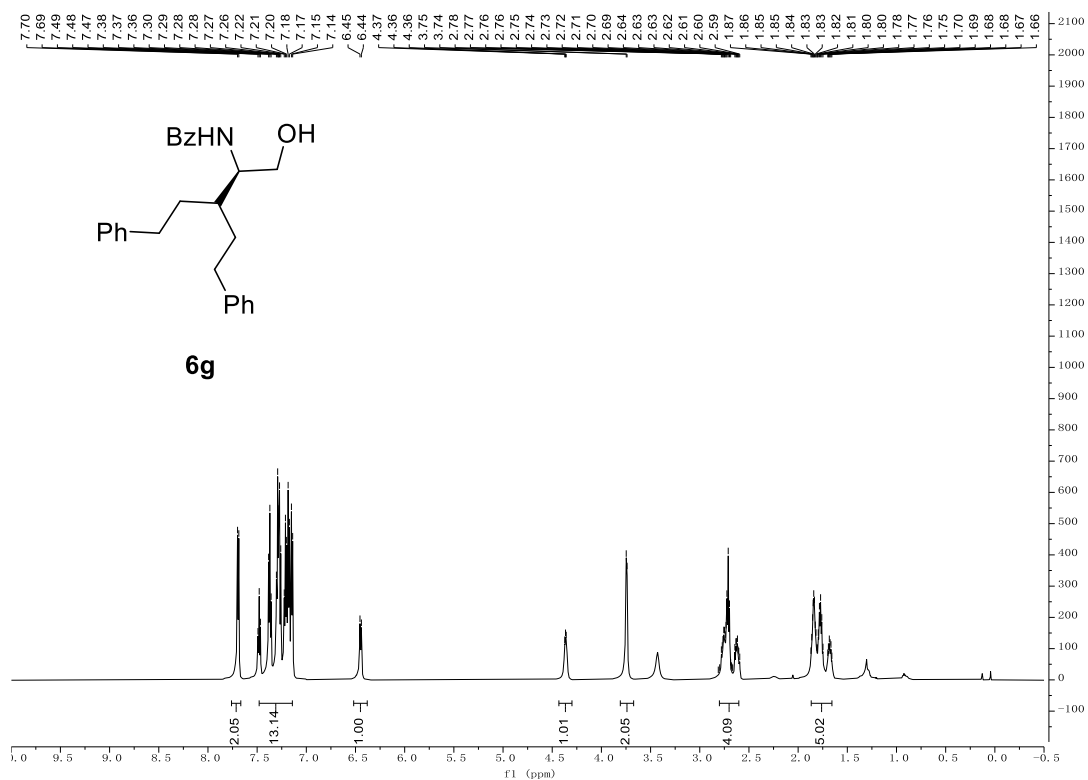

$^1\text{H}$  NMR (600 MHz,  $\text{CDCl}_3$ ) spectrum for **6g**

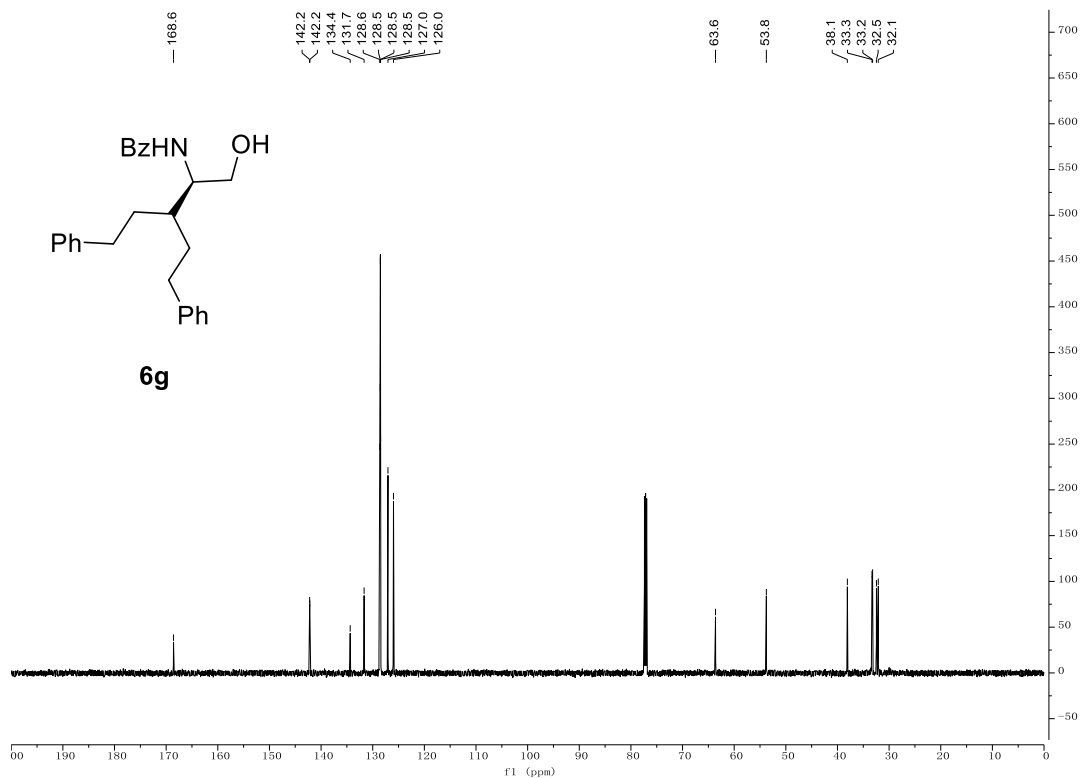

$^{13}\text{C}$  NMR (151 MHz,  $\text{CDCl}_3$ ) spectrum for **6g**

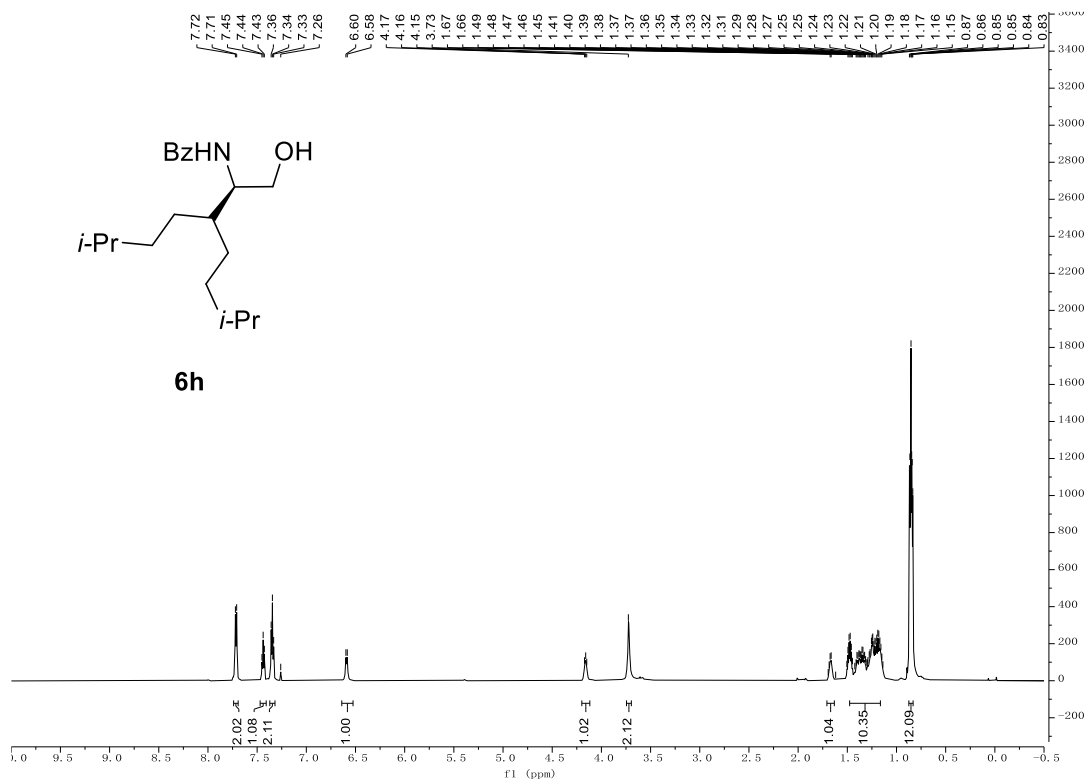

$^1\text{H}$  NMR (600 MHz,  $\text{CDCl}_3$ ) spectrum for **6h**

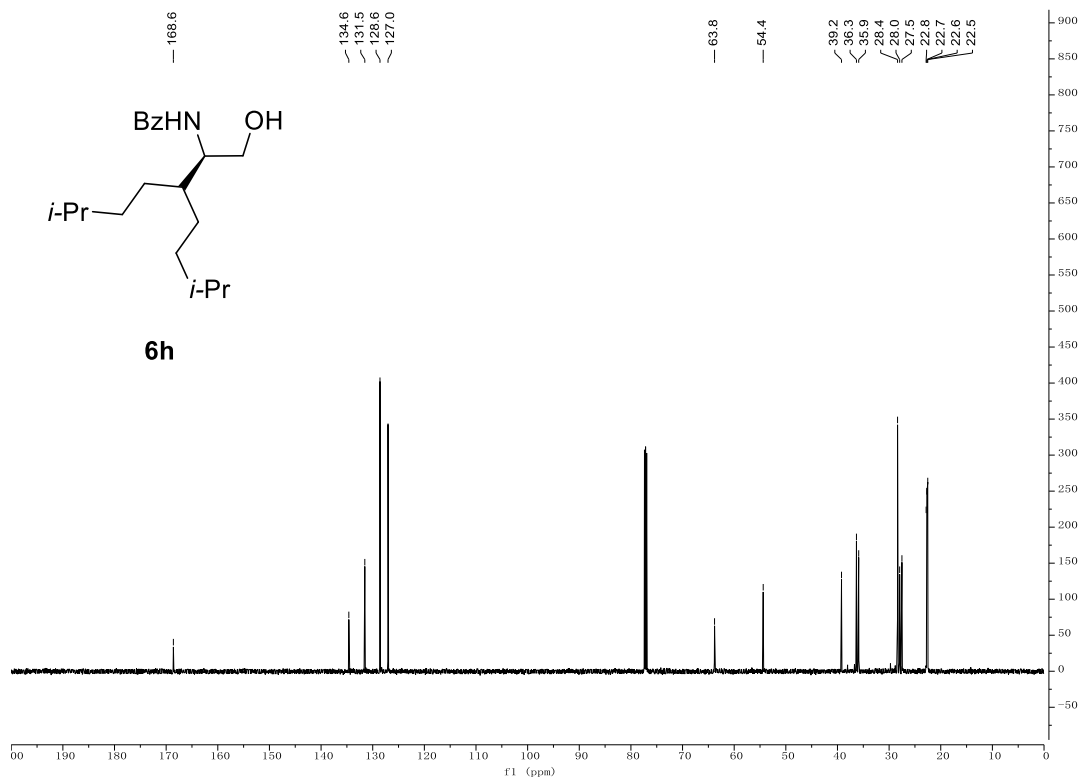

$^{13}\text{C}$  NMR (151 MHz,  $\text{CDCl}_3$ ) spectrum for **6h**

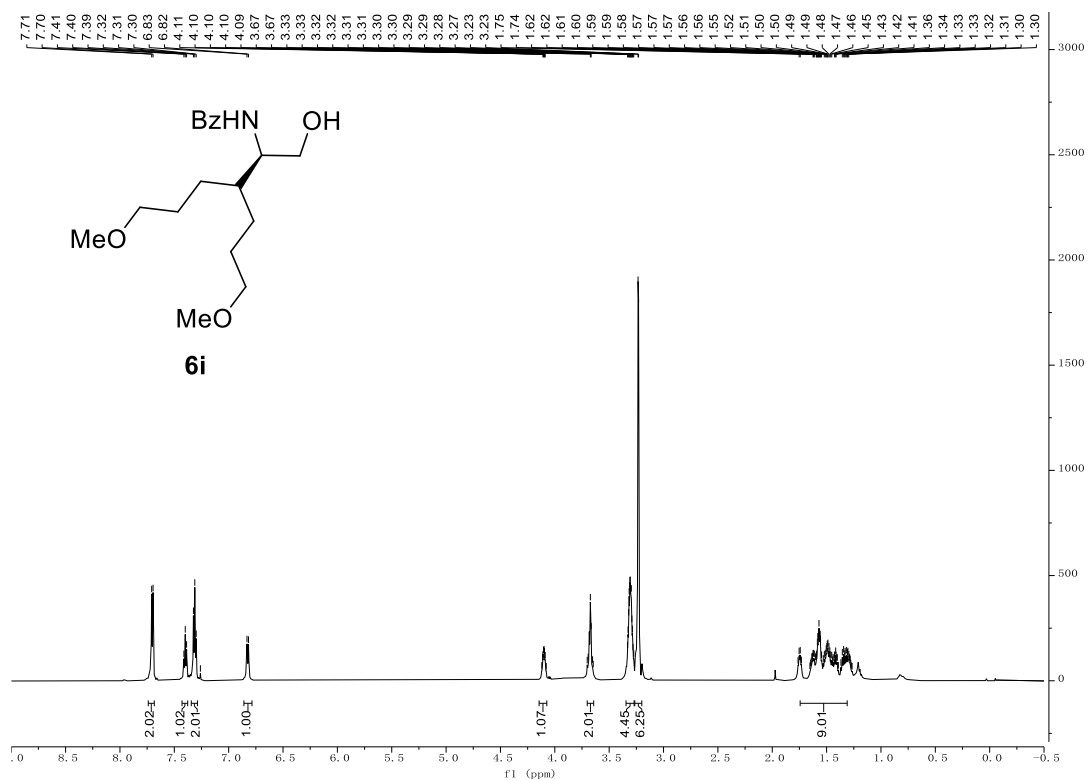

<sup>1</sup>H NMR (600 MHz, CDCl<sub>3</sub>) spectrum for **6i**

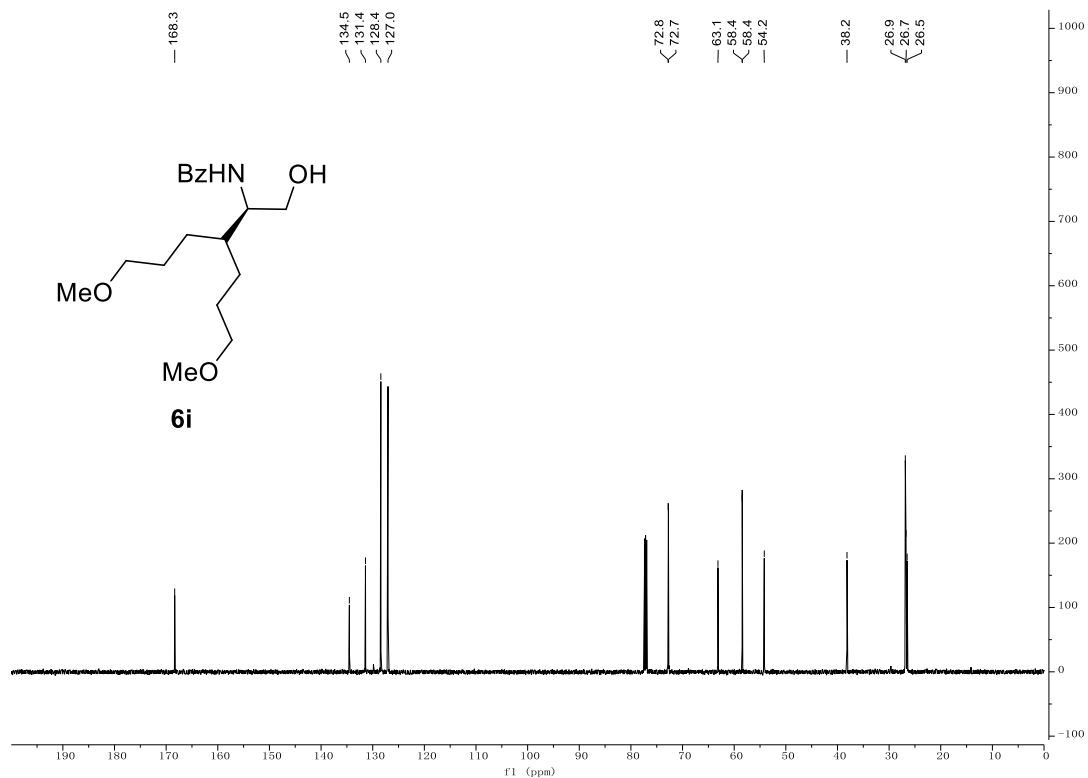

<sup>13</sup>C NMR (151 MHz, CDCl<sub>3</sub>) spectrum for **6i**

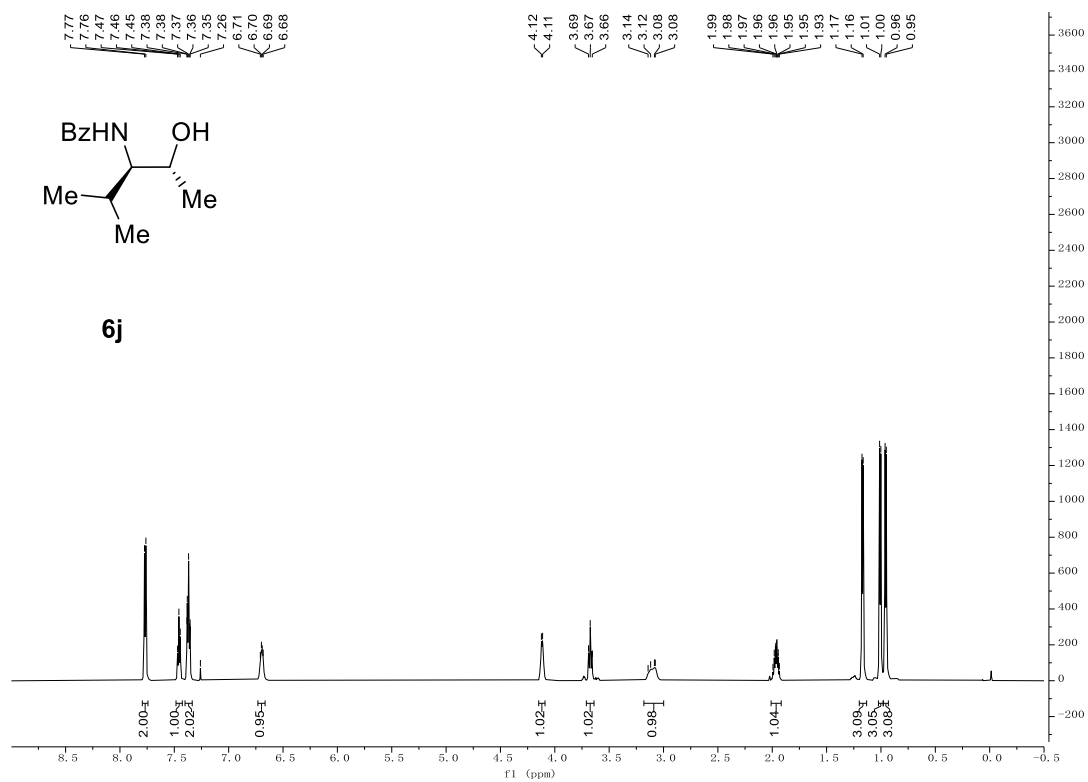

$^1\text{H}$  NMR (600 MHz,  $\text{CDCl}_3$ ) spectrum for **6j**

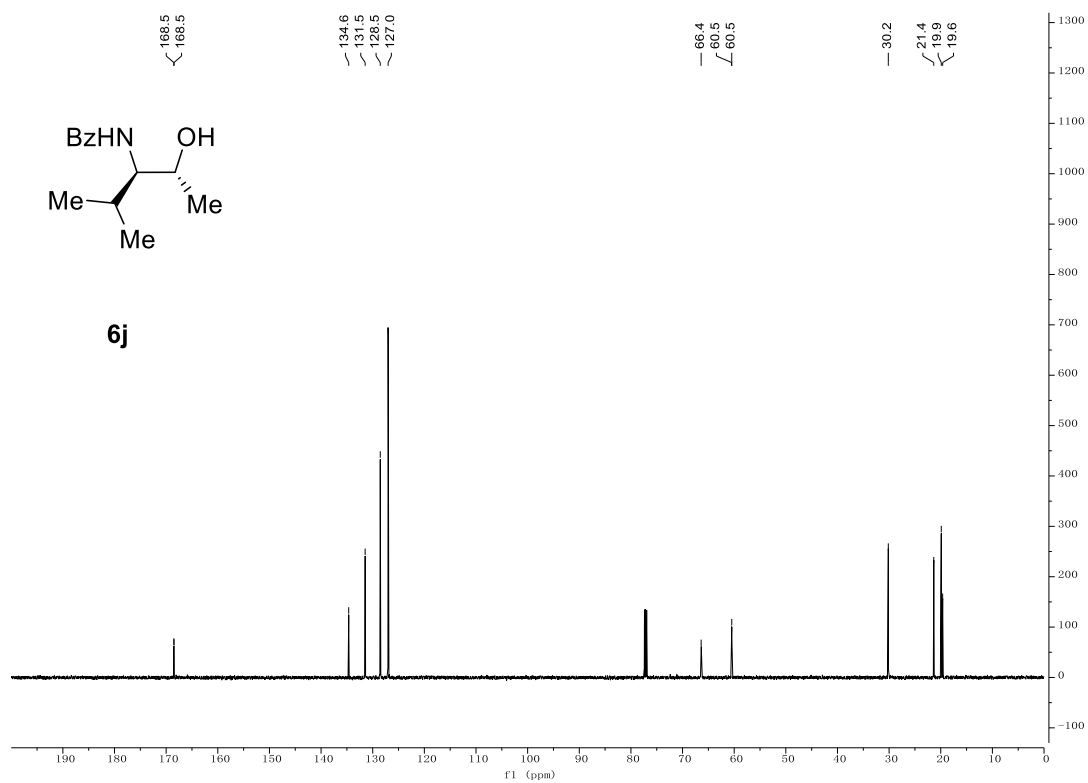

$^{13}\text{C}$  NMR (151 MHz,  $\text{CDCl}_3$ ) spectrum for **6j**



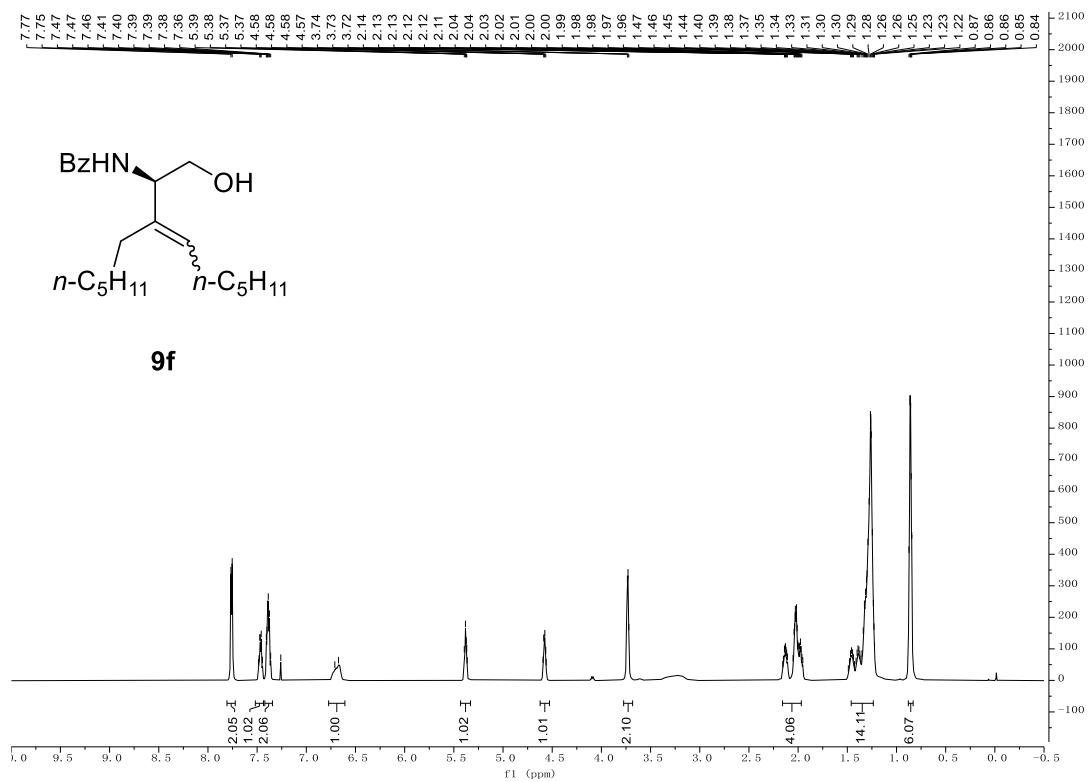

$^1\text{H NMR}$  (600 MHz,  $\text{CDCl}_3$ ) spectrum for **9f**

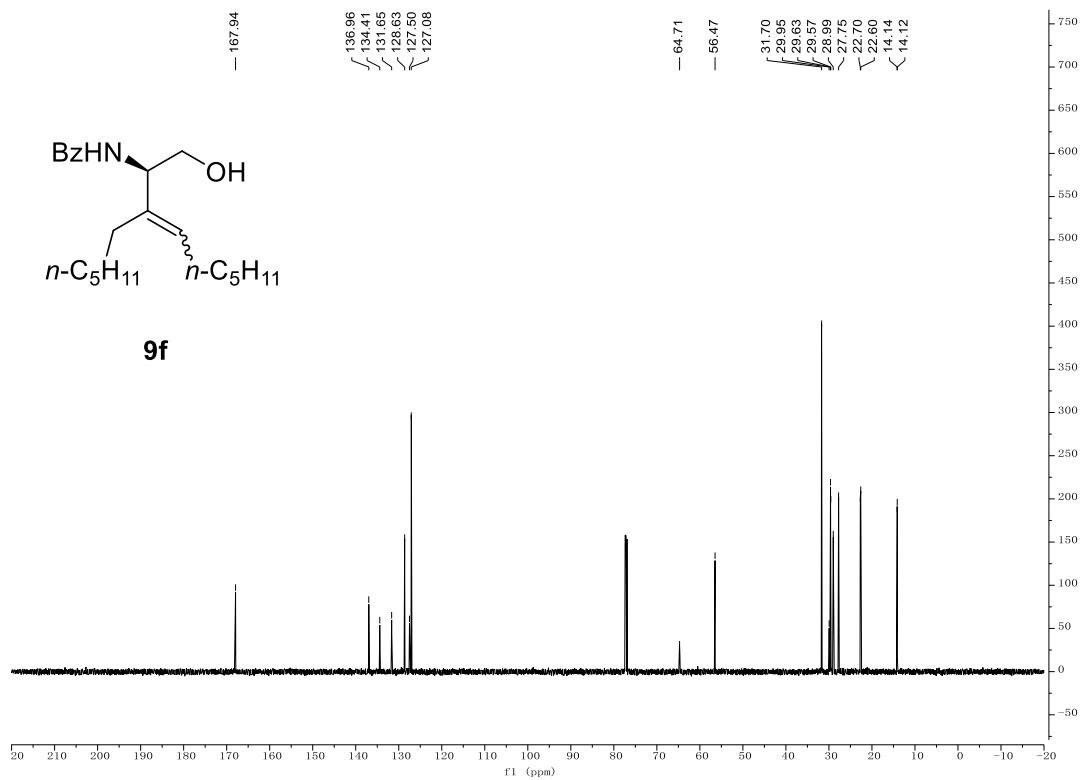

$^{13}\text{C NMR}$  (151 MHz,  $\text{CDCl}_3$ ) spectrum for **9f**

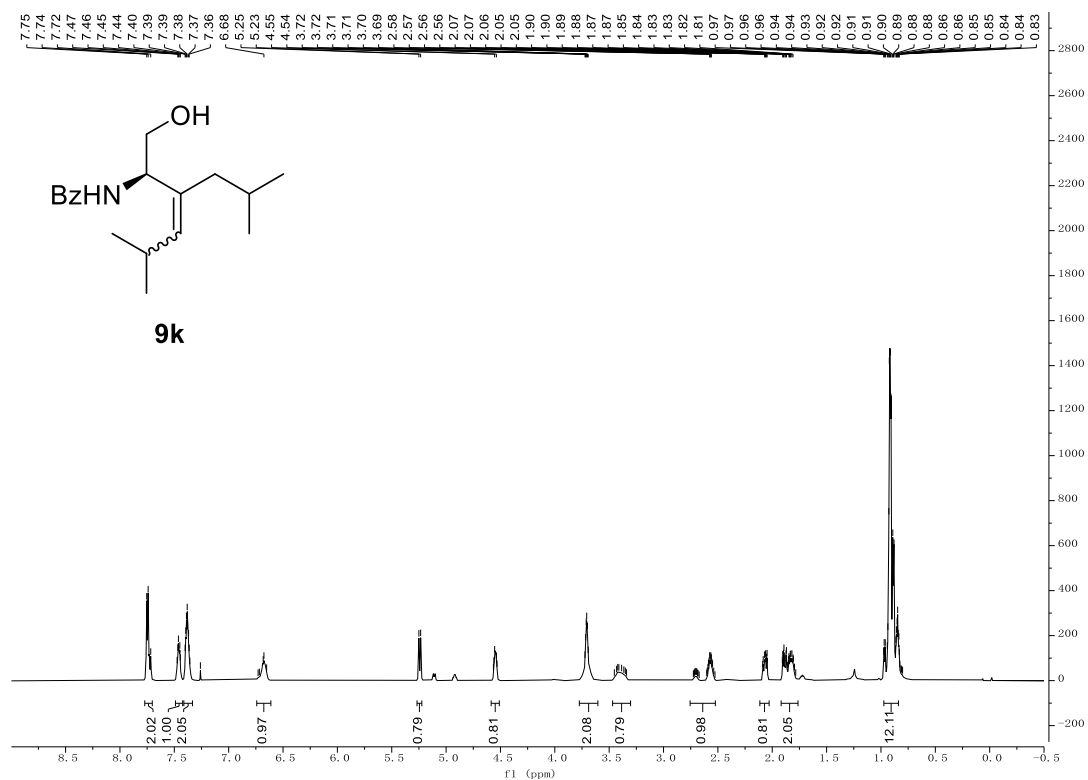

$^1\text{H NMR}$  (600 MHz,  $\text{CDCl}_3$ ) spectrum for **9k**

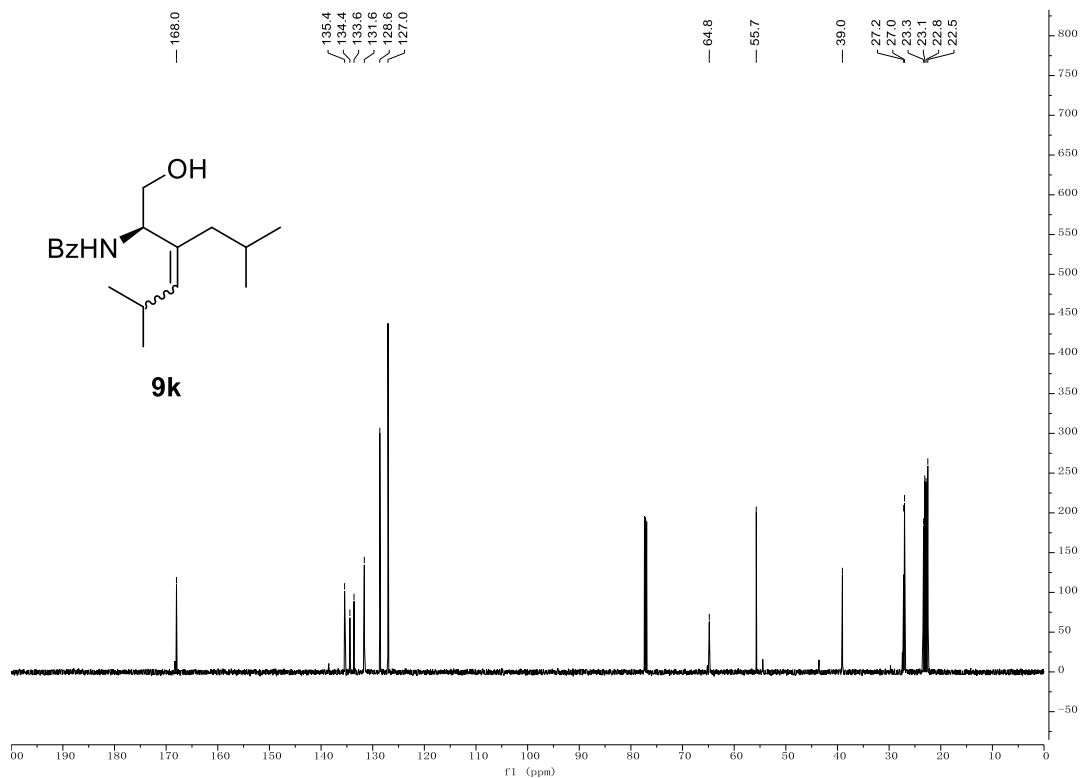

$^{13}\text{C NMR}$  (151 MHz,  $\text{CDCl}_3$ ) spectrum for **9k**

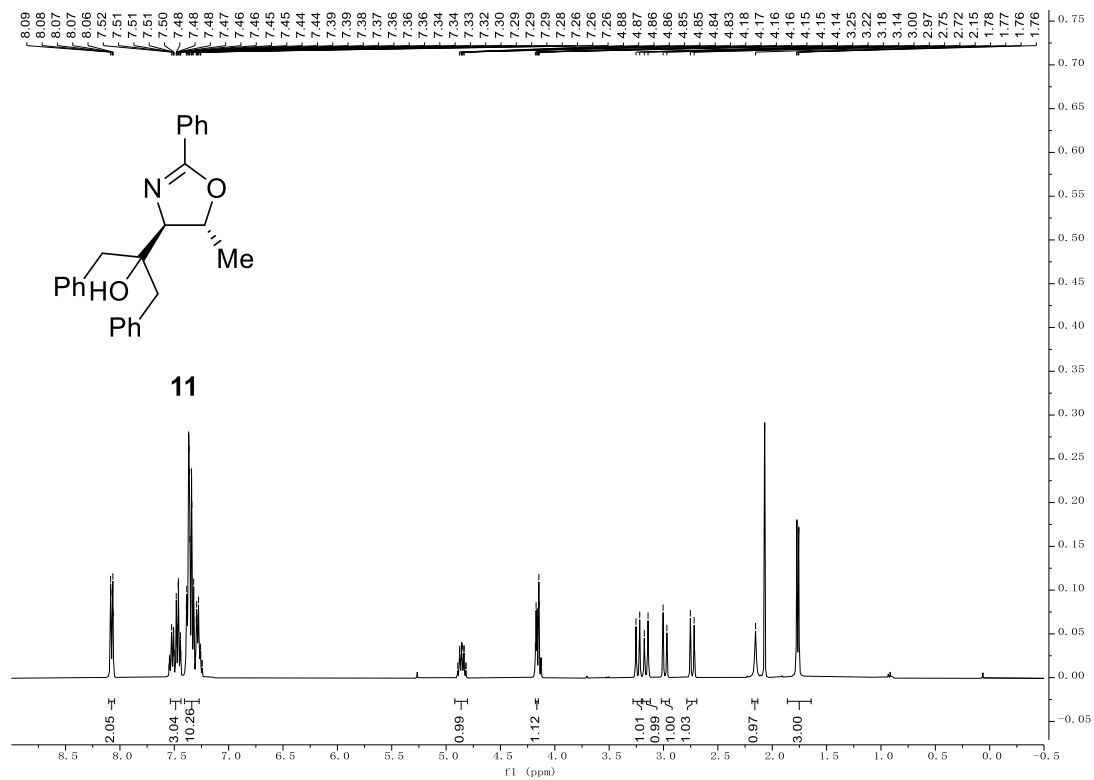

$^1\text{H}$  NMR (600 MHz,  $\text{CDCl}_3$ ) spectrum for **11**

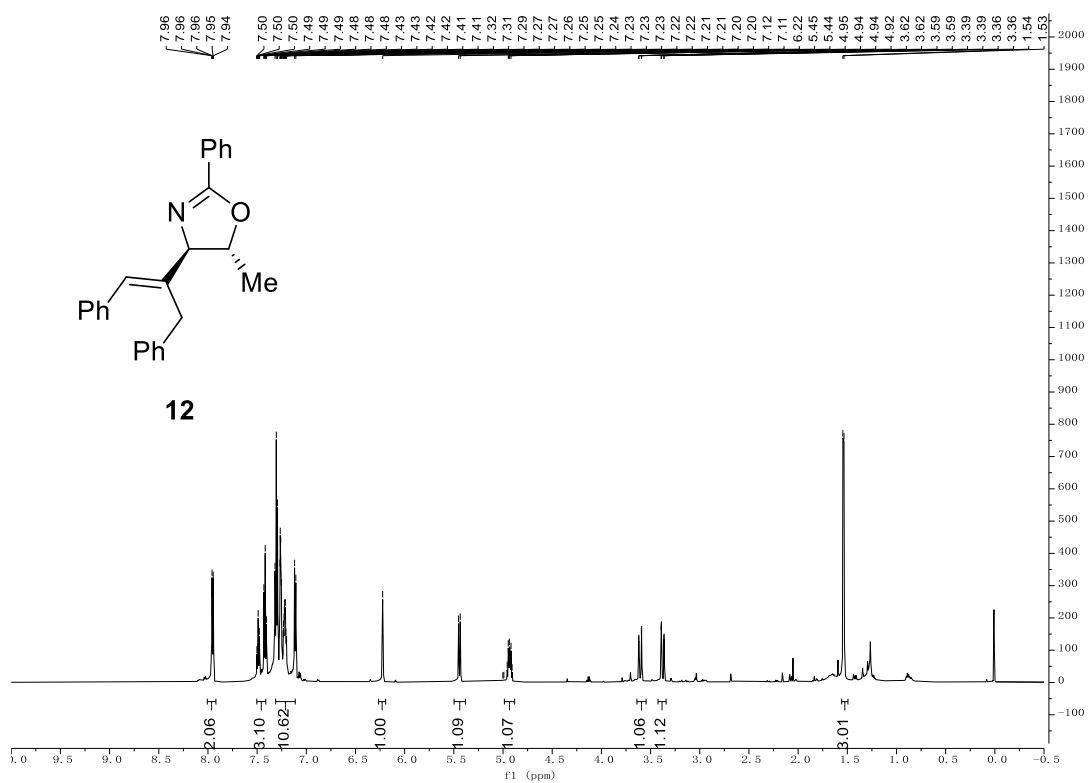

$^1\text{H}$  NMR (600 MHz,  $\text{CDCl}_3$ ) spectrum for **12**

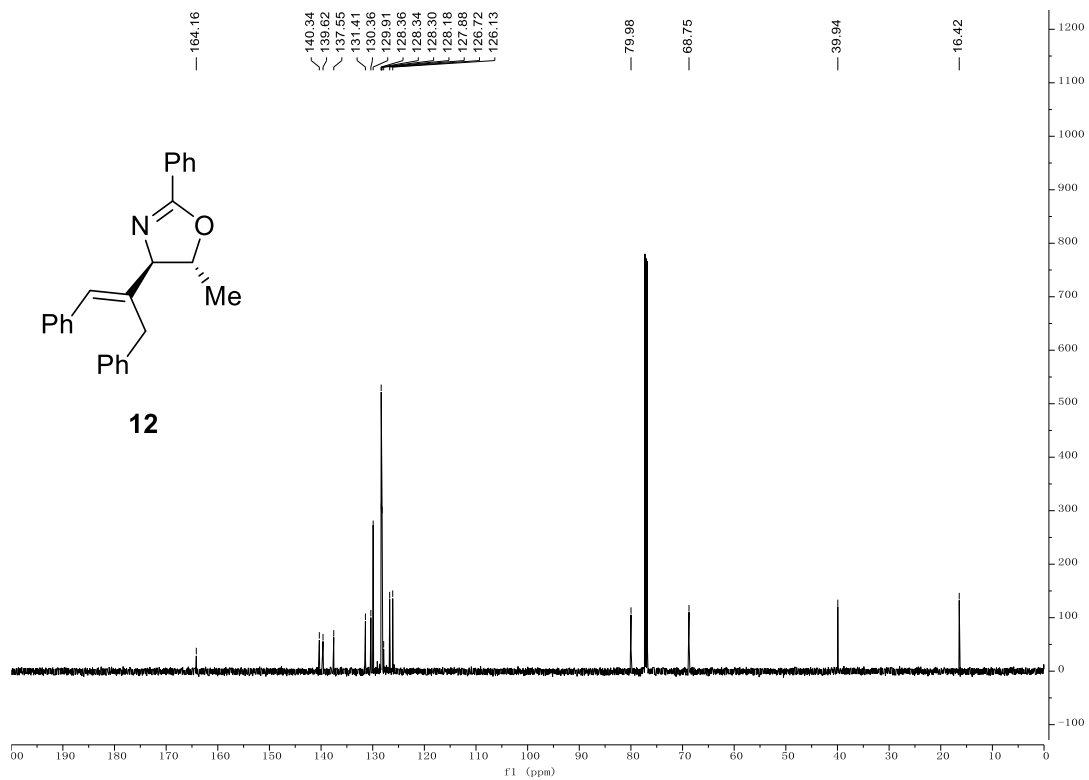

<sup>13</sup>C NMR (151 MHz, CDCl<sub>3</sub>) spectrum for **12**

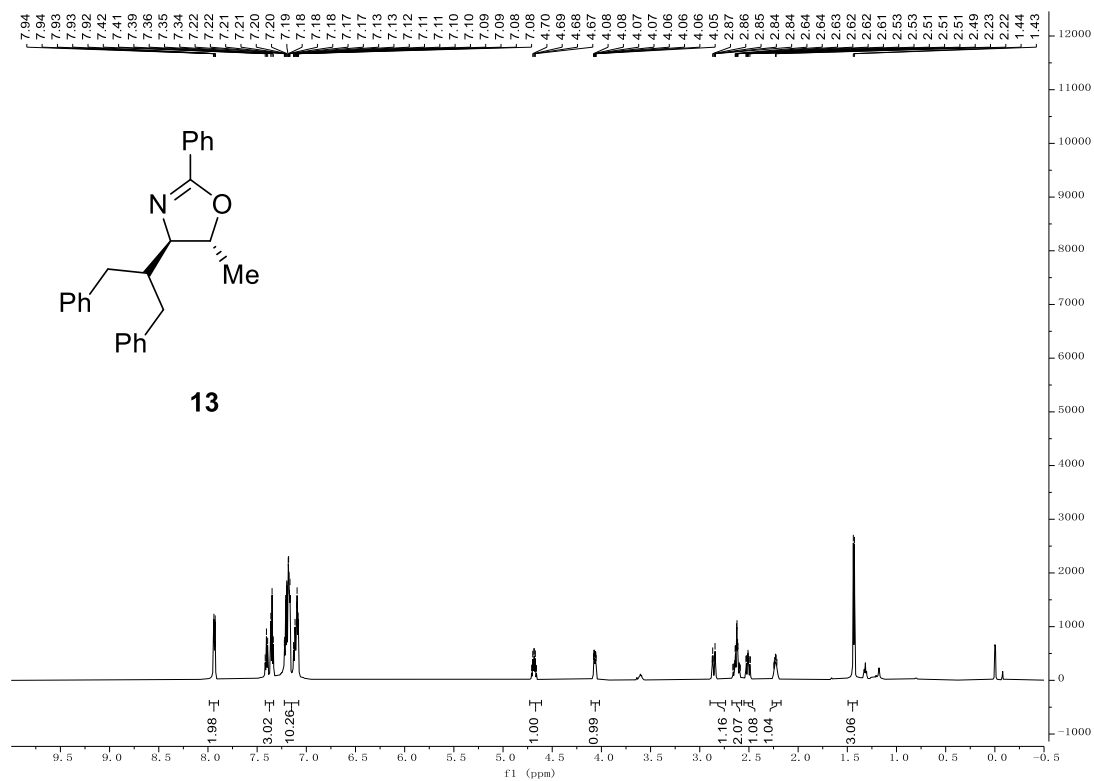

<sup>1</sup>H NMR (600 MHz, CDCl<sub>3</sub>) spectrum for **13**

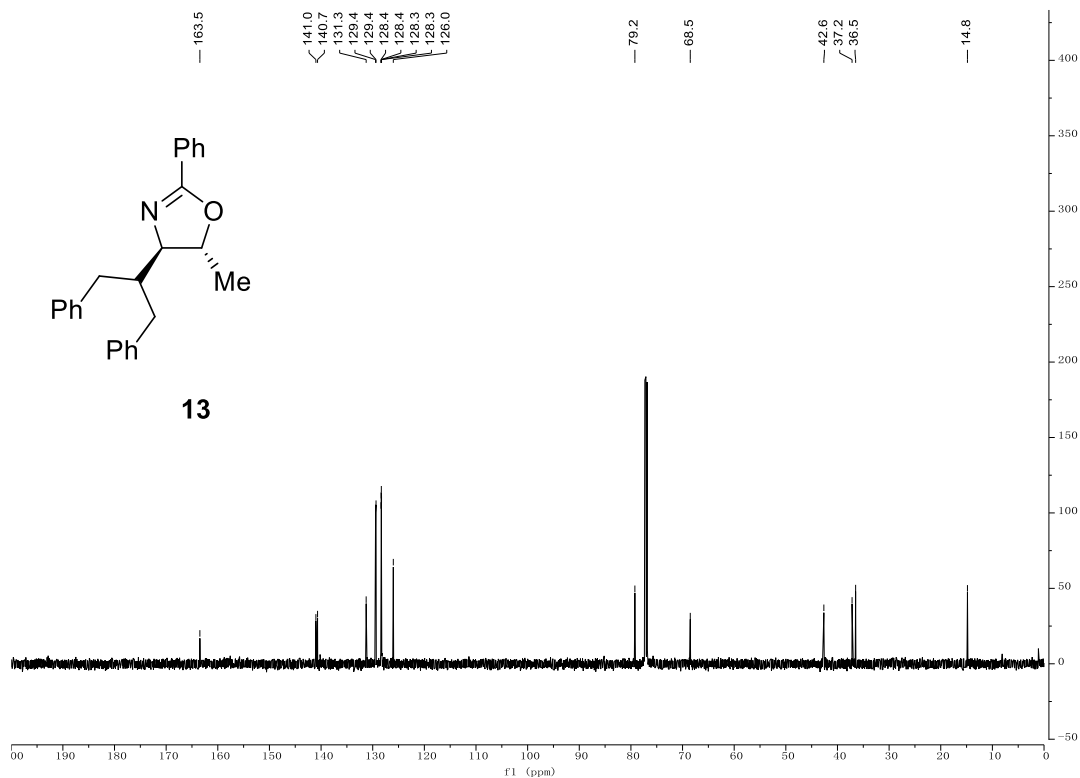

$^{13}\text{C}$  NMR (151 MHz,  $\text{CDCl}_3$ ) spectrum for **13**

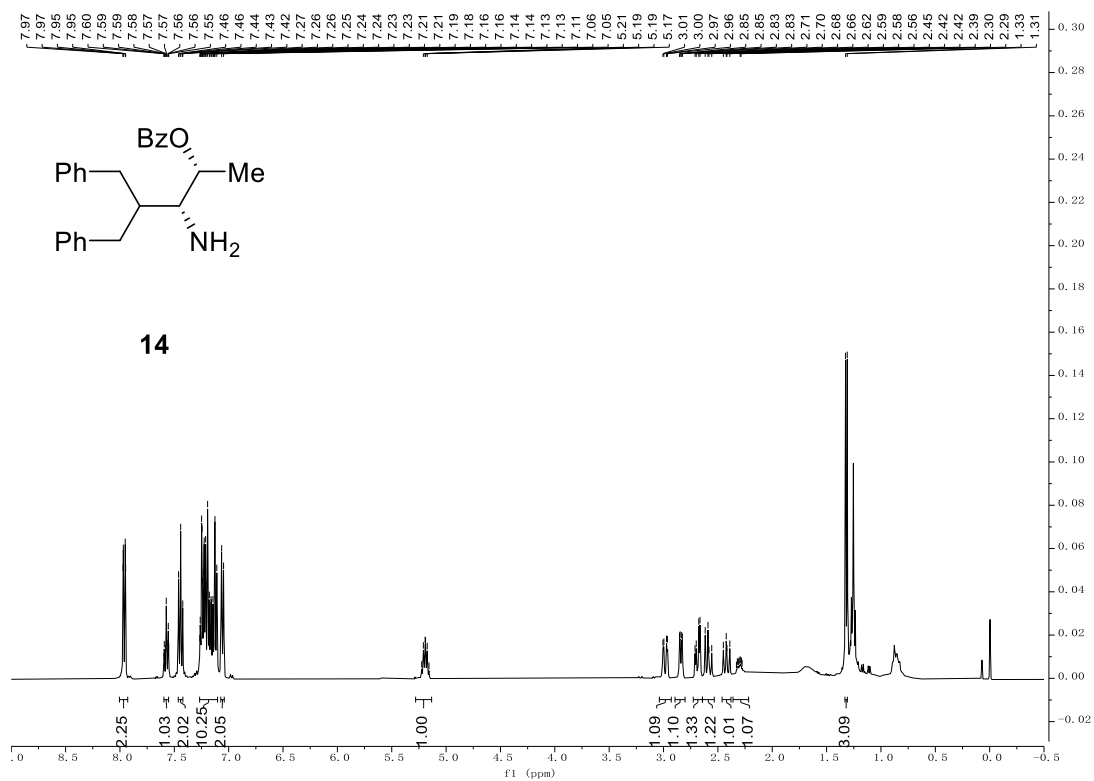

$^1\text{H}$  NMR (400 MHz,  $\text{CDCl}_3$ ) spectrum for **14**

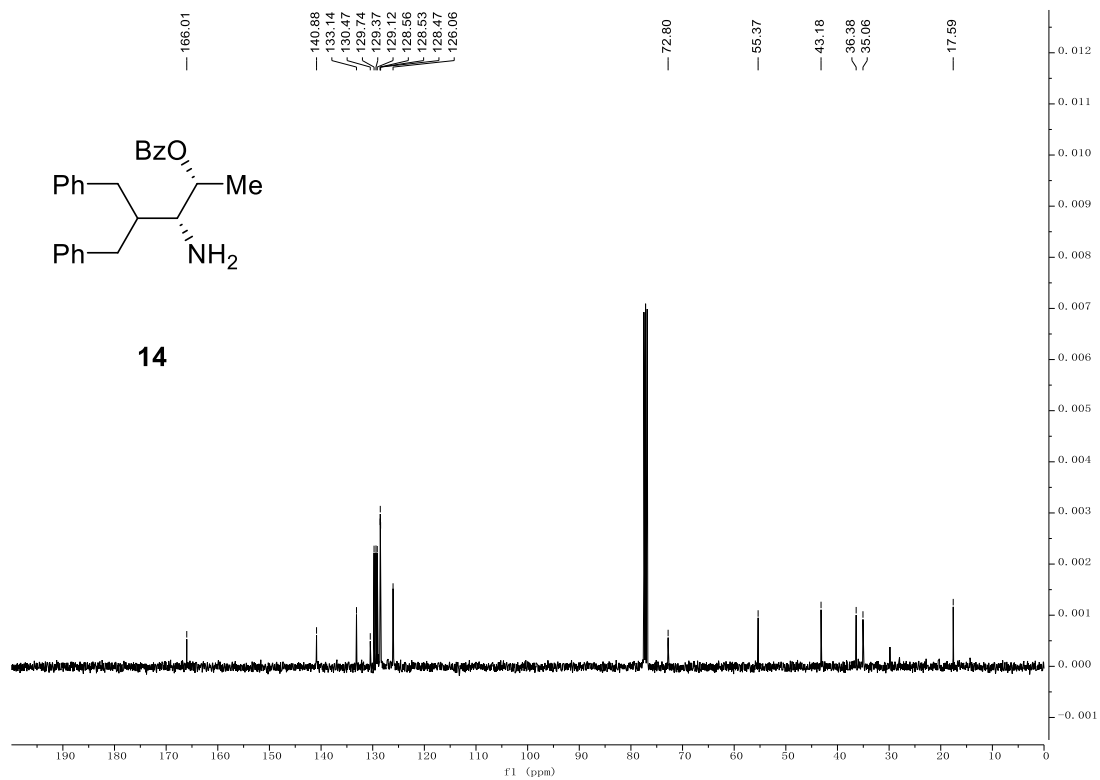

$^{13}\text{C}$  NMR (101 MHz,  $\text{CDCl}_3$ ) spectrum for **14**

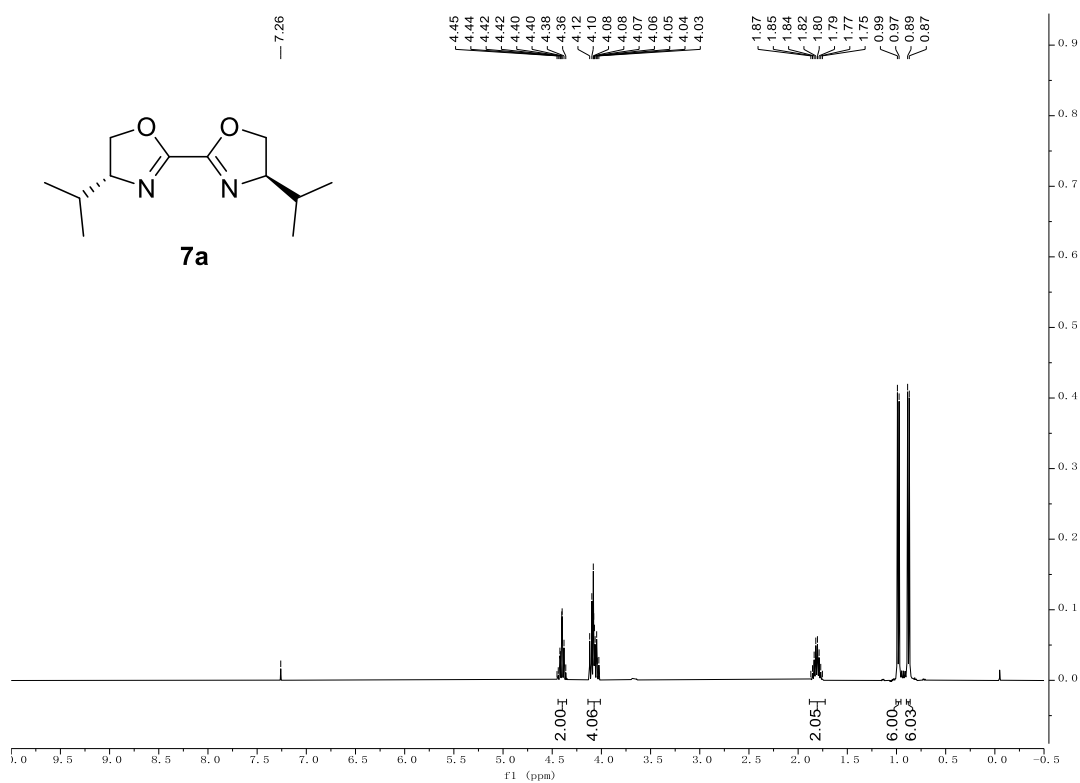

$^1\text{H}$  NMR (400 MHz,  $\text{CDCl}_3$ ) spectrum for **7a**

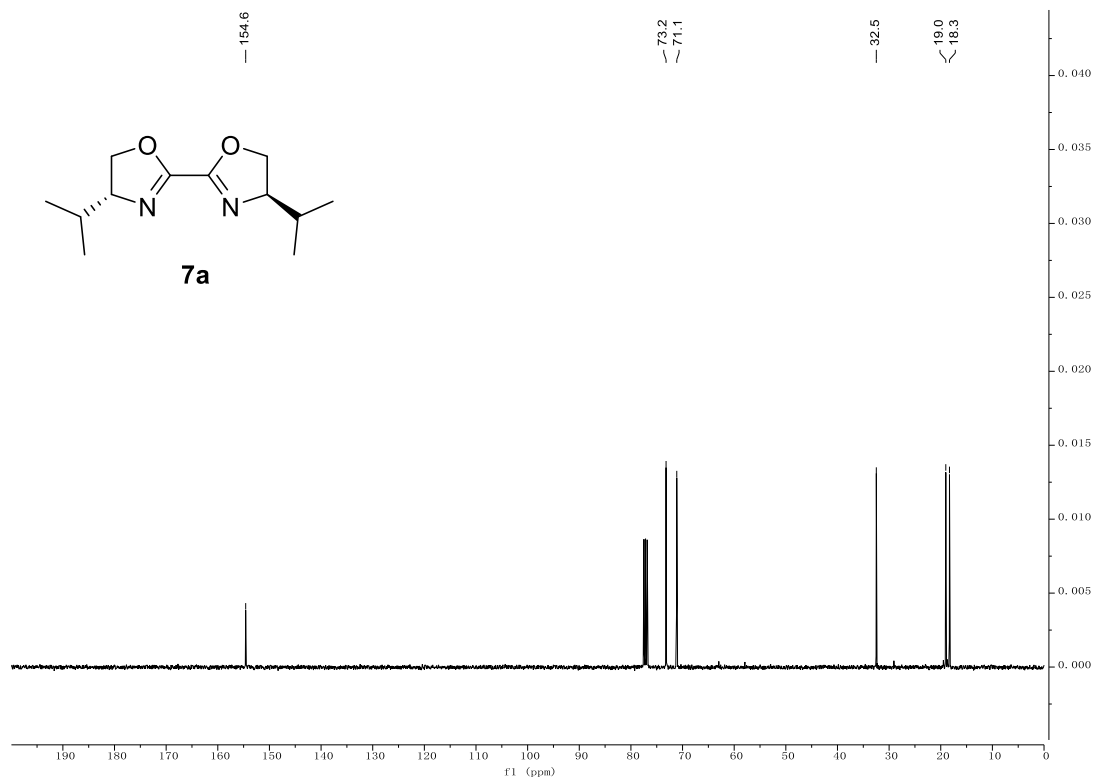

$^{13}\text{C}$  NMR (101 MHz,  $\text{CDCl}_3$ ) spectrum for **7a**

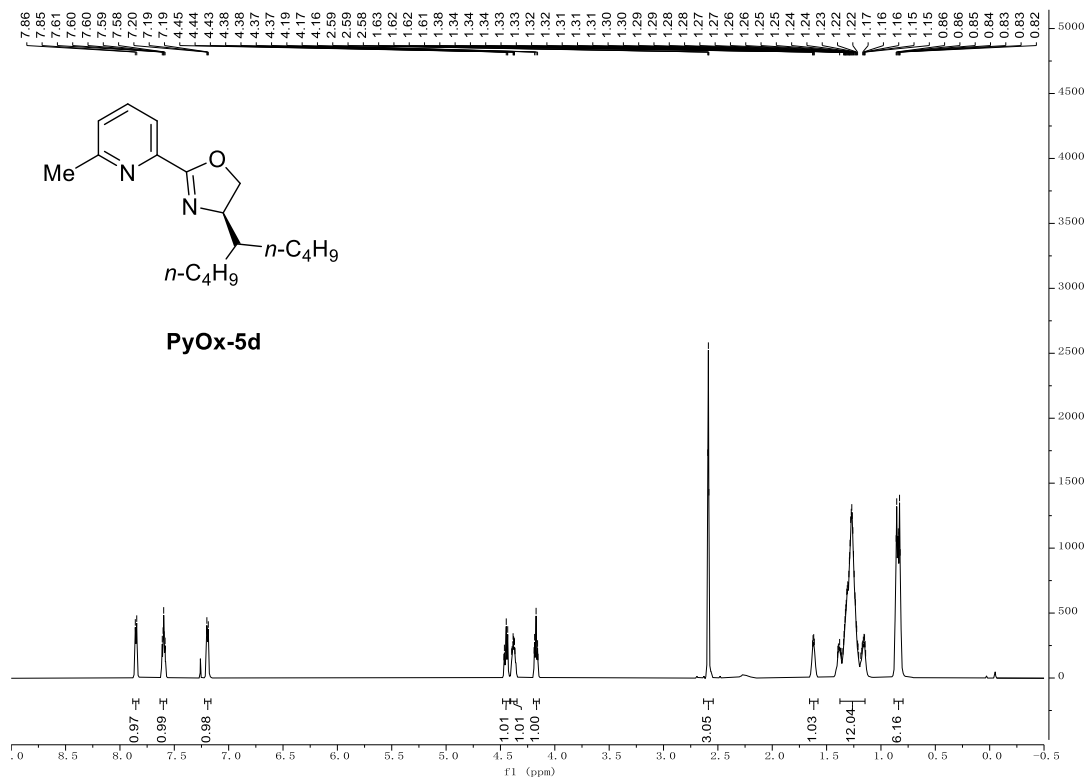

$^1\text{H}$  NMR (600 MHz,  $\text{CDCl}_3$ ) spectrum for **PyOx-5d**

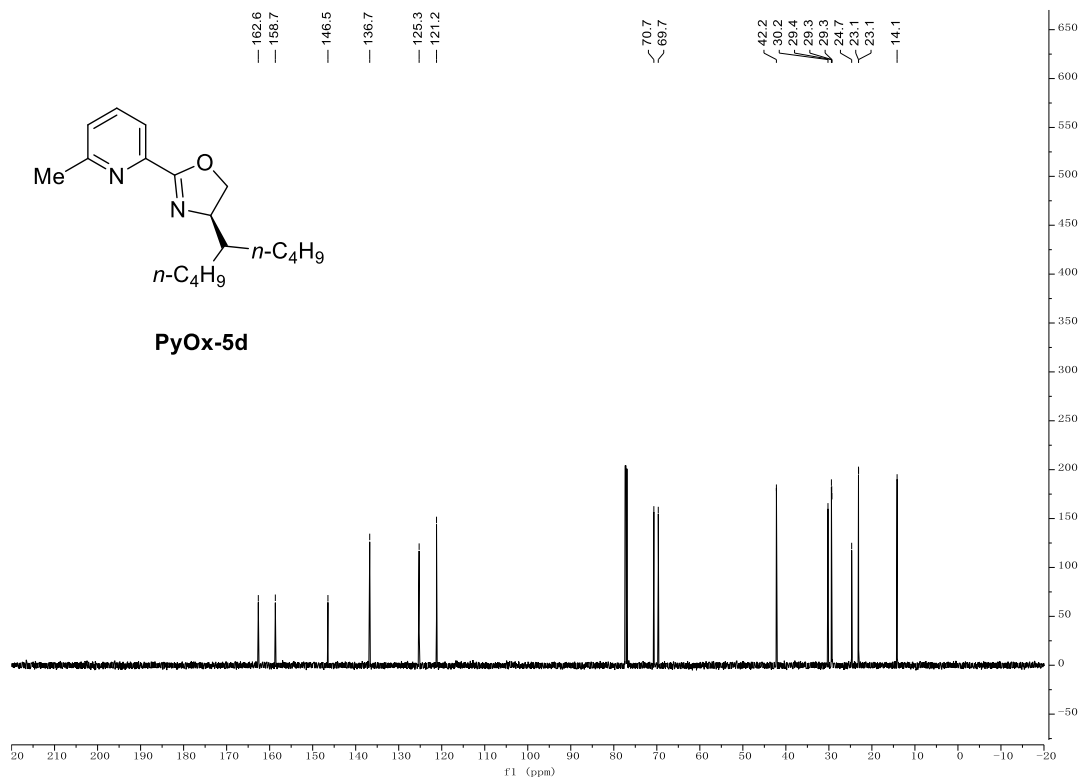

$^{13}\text{C}$  NMR (151 MHz,  $\text{CDCl}_3$ ) spectrum for **PyOx-5d**

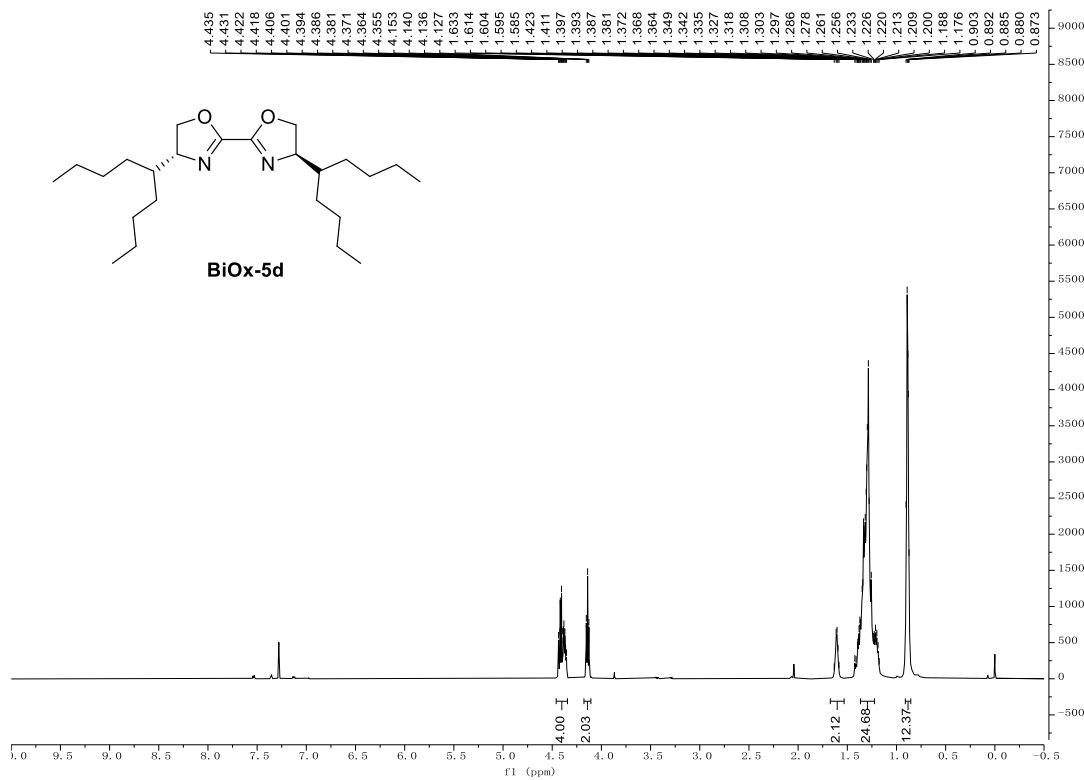

$^1\text{H}$  NMR (600 MHz,  $\text{CDCl}_3$ ) spectrum for **BiOx-5d**



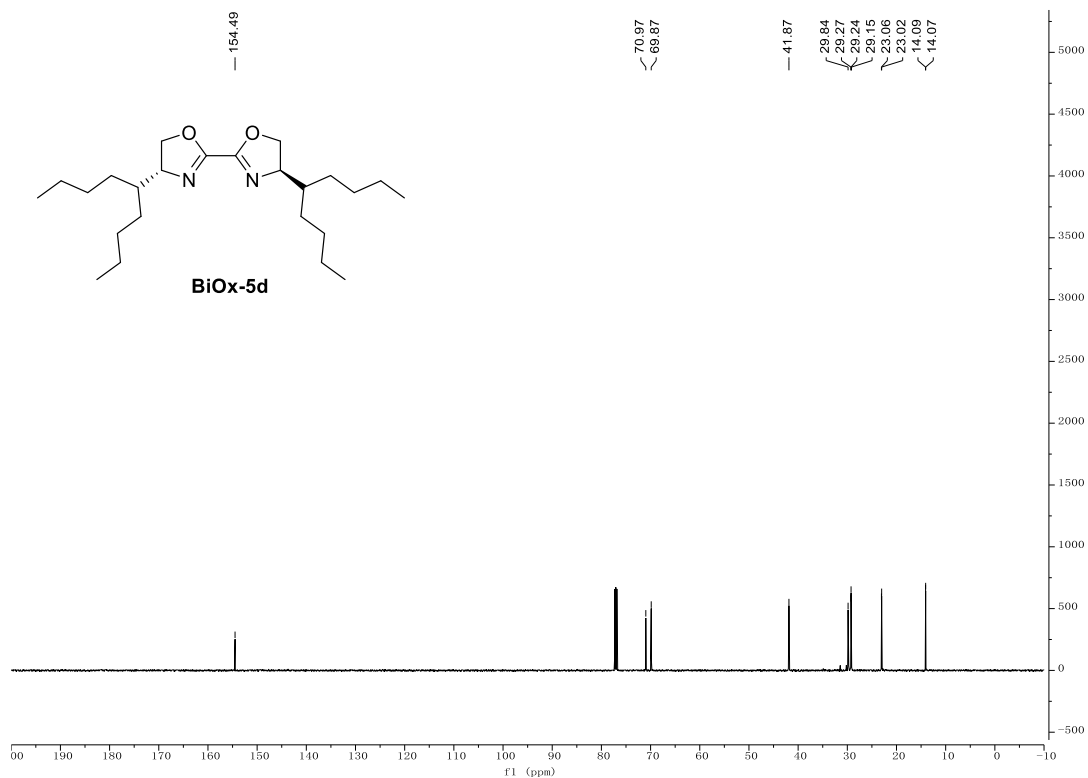

$^{13}\text{C}$  NMR (151 MHz,  $\text{CDCl}_3$ ) spectrum for **BiOx-5d**

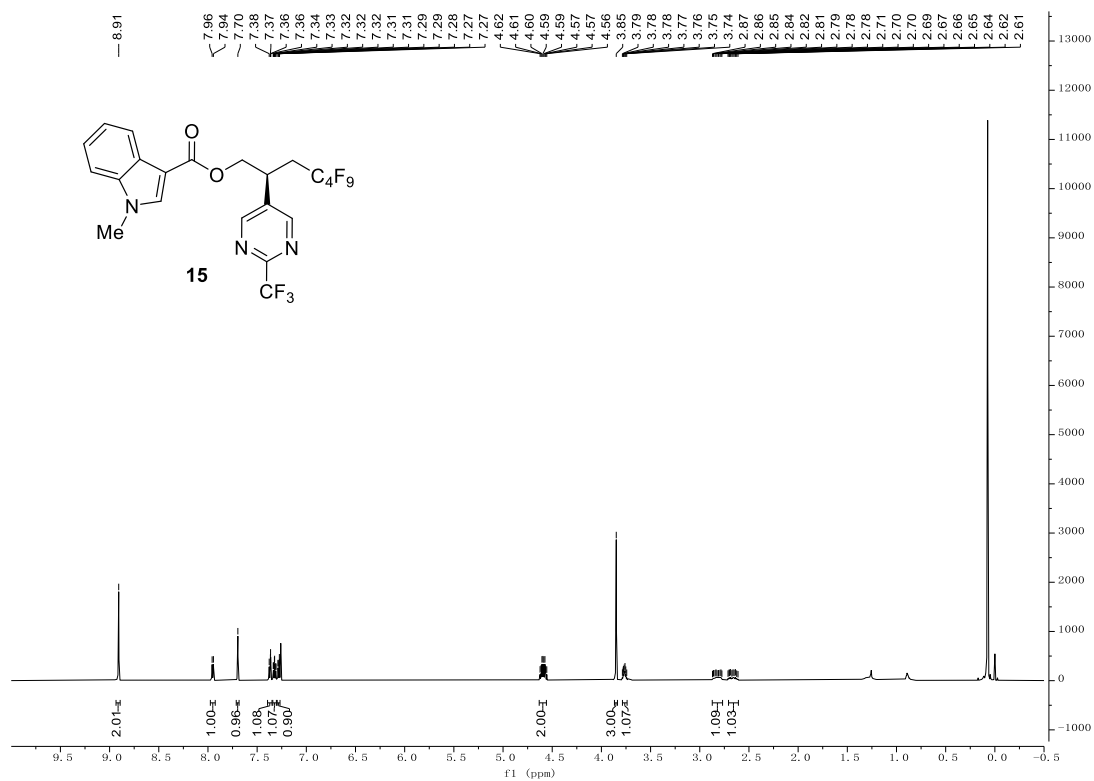

$^1\text{H}$  NMR (600 MHz,  $\text{CDCl}_3$ ) spectrum for **15**

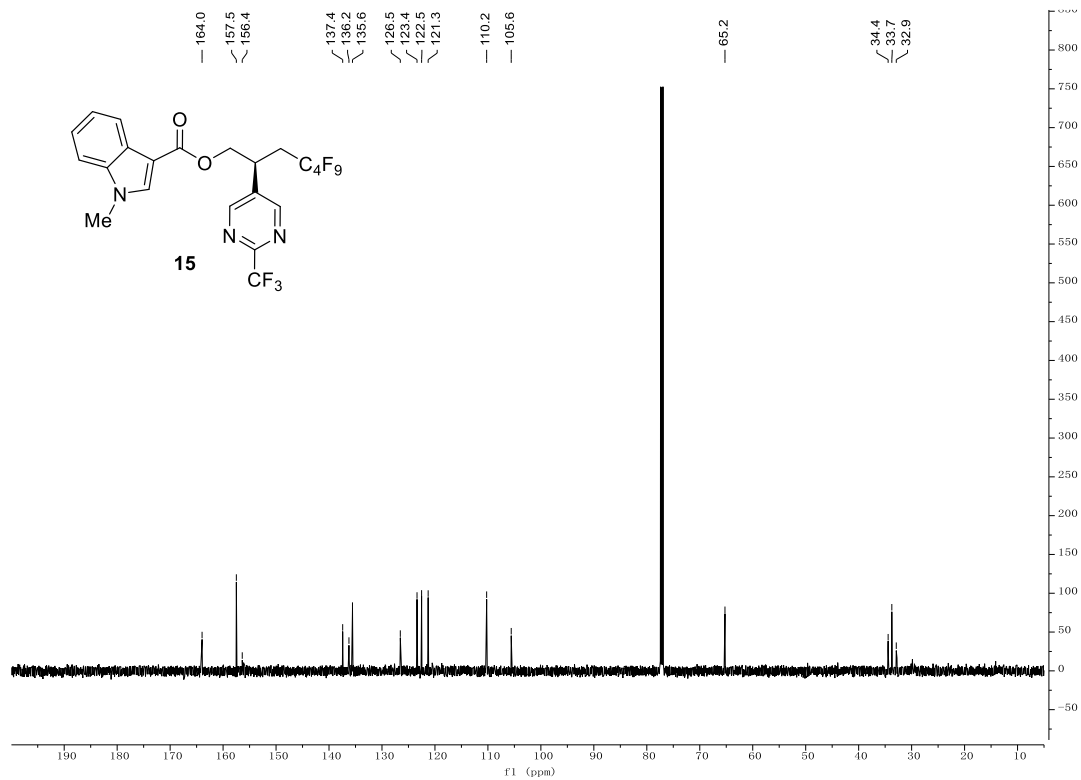

<sup>13</sup>C NMR (151 MHz, CDCl<sub>3</sub>) spectrum for **15**

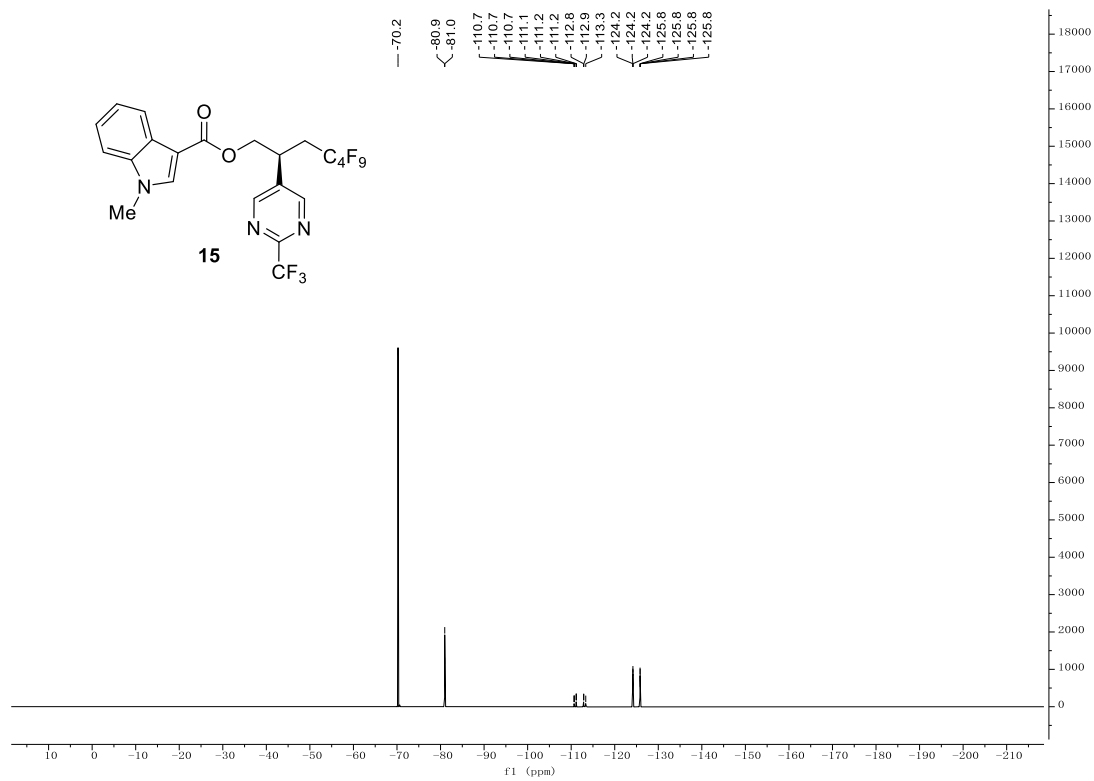

<sup>19</sup>F NMR (565 MHz, CDCl<sub>3</sub>) spectrum for **15**

## References

1. W. Huang, S. Fan, J. Gao, S. Luo, S. Tang, J. Liu and X. Wang, *Angew. Chem. Int. Ed.*, 2022, **61**, e202204907.
2. A. Sahari, C. D. Do, J. K. Mannisto, E. Antico, A. Amaratunga, K. H. Hopmann and T. Repo, *Chem. Commun.*, 2022, **58**, 3027-3030.
3. X. E. Hu, N. K. Kim, J. L. Gray, J.-I. K. Almstead, W. L. Seibel and B. Ledoussal, *J. Med. Chem.*, 2003, **46**, 3655-3661.
4. C. Beemelmanns and H.-U. Reissig, *Chem. -Eur. J.*, 2015, **21**, 8416-8425.
5. H. Sajiki, T. Ikawa, K. Hattori and K. Hirota, *Chem. Commun.*, 2003, 654-655.
6. M. Luo, H. Xu, Y. Dong, K. Shen, J. Lu, Z. Yin, M. Qi, G. Sun, L. Tang, J. Xiang, Z. Deng, J. S. Dickschat and Y. Sun, *Angew. Chem. Int. Ed.*, 2021, **60**, 19139-19143.
7. X. Liang, C.-J. Lee, J. Zhao, E. J. Toone and P. Zhou, *J. Med. Chem.*, 2013, **56**, 6954-6966.
8. M. Diéguez and O. Pàmies, *Chem. -Eur. J.*, 2008, **14**, 3653-3669.
9. F. Menges and A. Pfaltz, *Adv. Synth. Catal.*, 2002, **344**, 40-44.
10. K. E. Poremba, N. T. Kadunce, N. Suzuki, A. H. Cherney and S. E. Reisman, *J. Am. Chem. Soc.*, 2017, **139**, 5684-5687.
11. A. G. De Crisci, K. Chung, A. G. Oliver, D. Solis-Ibarra and R. M. Waymouth, *Organometallics*, 2013, **32**, 2257-2266.
